# Supplementary material for: A versatile strategy for the formation of hydride-bridged actinide–iridium multimetallics
Source: Royal Society of Chemistry journal article supplement (doi:10.1039/d2sc04903a), 2022-12-19
Supplement: d2sc04903a1.pdf [file d2sc04903a1.pdf]

## **A Versatile Strategy for the Formation of Hydride-Bridged Actinide-Iridium Multimetallics**

Christopher Z. Ye,<sup>a</sup> Iker Del Rosal,<sup>b</sup> Michael A. Boreen,<sup>a</sup> Erik T. Ouellette,<sup>a</sup> Dominic Russo,<sup>a</sup>  
Laurent Maron,<sup>b</sup> John Arnold,<sup>\*a</sup> and Clément Camp<sup>\*c</sup>

<sup>a</sup> Department of Chemistry, University of California, Berkeley, California 94720, United States;  
Chemical Sciences Division, Lawrence Berkeley National Laboratory, Berkeley, California  
94720, United States.

<sup>b</sup> LPCNO, Université de Toulouse, INSA Toulouse, 135 Avenue de Rangueil, Toulouse 31077,  
France.

<sup>c</sup> Laboratory of Catalysis, Polymerization, Processes and Materials, CP2M UMR 5128,  
Université de Lyon, Institut de Chimie de Lyon, CNRS, Université Lyon 1, ESCPE Lyon, 43 Bd  
du 11 Novembre 1918, F-69616 Villeurbanne, France.

## **Supporting Information**

|                         |          |
|-------------------------|----------|
| Experimental Procedures | S3-S4    |
| UV-Vis Spectroscopy     | S6       |
| IR Spectroscopy         | S7-S9    |
| NMR Spectroscopy        | S10-S14  |
| X-ray Crystallography   | S15-S17  |
| Computational Section   | S18-S132 |
| References              | S133     |

## Experimental Procedures

*General considerations:* Unless otherwise noted, all reactions were performed using standard Schlenk line techniques under an atmosphere of nitrogen or argon, or in an MBraun inert atmosphere glove box under an atmosphere of nitrogen. Glassware and Celite® were stored in an oven at ca. 150 °C for at least 3 h prior to use. Molecular sieves (4 Å) were activated by heating to 200 °C overnight under vacuum prior to storage in a glovebox. NMR spectra were recorded on Bruker AV-600 and AVB-400 spectrometers. <sup>1</sup>H chemical shifts are given relative to residual solvent peaks and are recorded in units of parts per million (ppm). FT-IR samples were prepared as Nujol mulls pressed between KBr plates or as solutions in C<sub>6</sub>D<sub>6</sub> between KBr plates, with data collected with a Nicolet iS10 FT-IR spectrometer. Melting points were determined using sealed capillaries prepared under nitrogen on an OptiMelt automated melting point system. Elemental analyses were determined at the Microanalytical Facility at the College of Chemistry, University of California, Berkeley.

*Materials:* Toluene, *n*-hexane, and THF were purified by passage through columns of activated alumina and degassed by sparging with nitrogen. Deuterated solvents were degassed with three freeze-pump-thaw cycles and stored over molecular sieves. Benzylpotassium,<sup>1</sup> IrCp\*H<sub>4</sub>,<sup>2</sup> UI<sub>3</sub>(1,4-dioxane)<sub>1.5</sub>,<sup>3</sup> UCl<sub>4</sub>,<sup>4</sup> and ThCl<sub>4</sub>(DME)<sub>2</sub><sup>5</sup> were synthesized according to literature procedures. All other chemicals were purchased from commercial sources and used as received.

**U{(μ-H)<sub>3</sub>IrCp\*}<sub>4</sub> (1):** IrCp\*H<sub>4</sub> (68.7 mg, 0.207 mmol, 4.0 equiv.) and benzyl potassium (28.5 mg, 0.219 mmol, 4.2 equiv.) were added to a 20 mL scintillation vial with THF (2 mL) to generate a solution of K[IrCp\*H<sub>3</sub>]. UCl<sub>4</sub> (19.7 mg, 0.052 mmol, 1.0 equiv.) was dissolved in THF (2 mL) and added to the K[IrCp\*H<sub>3</sub>] solution. The solution quickly turned orange and slightly opaque as KCl precipitated out of solution. After stirring at room temperature for 2.5 h, the solvent was removed *in vacuo*. The crude solid was then triturated with *n*-hexane and the product was extracted with *n*-hexane (5 mL), filtered through Celite, and concentrated (ca. 1.5 mL). The resulting orange solution was cooled to -40 °C overnight, affording thin orange plates (60.8 mg, 75% yield). X-ray quality crystals were grown by recrystallization of **1** in *n*-hexane at -40 °C. Mp ca. 226 °C (decomp.); <sup>1</sup>H NMR (400 MHz, C<sub>6</sub>D<sub>6</sub>): δ 4.98 (s, 60H, CH<sub>3</sub>), no hydride resonances were found within the range 200 ppm to -200 ppm; <sup>13</sup>C NMR (600 MHz, C<sub>6</sub>D<sub>6</sub>): δ 113.97 (C<sub>5</sub>(CH<sub>3</sub>)<sub>5</sub>), 7.04 (C<sub>5</sub>(CH<sub>3</sub>)<sub>5</sub>); IR (Nujol mull on KBr): 2144 (m), 2017 (m), 1951 (s), 1072 (m), 1029 (m), 856 (w), 802 (m), 615 (w), 585 (w), 561 (w), 530 (w); IR (solution in C<sub>6</sub>D<sub>6</sub>, solvent subtracted): 2979 (w), 2957 (w), 2902 (m), 2850 (w), 1955 (s), 1476 (w), 1381 (m), 1073 (w), 1033 (m) cm<sup>-1</sup>. Anal. Calcd (%) for UIr<sub>4</sub>C<sub>40</sub>H<sub>72</sub>: C, 30.80; H, 4.65. Found: C, 30.92; H, 4.67.

**Th{(μ-H)<sub>2</sub>(H)IrCp\*}<sub>2</sub>[(μ-H)<sub>3</sub>IrCp\*]<sub>2</sub> (2).** IrCp\*H<sub>4</sub> (71.1 mg, 0.214 mmol, 4.0 equiv.) and benzyl potassium (28.3 mg, 0.217 mmol, 4.0 equiv.) were added to a 20 mL scintillation vial with THF (2 mL) to generate a solution of K[IrCp\*H<sub>3</sub>]. ThCl<sub>4</sub>(DME)<sub>2</sub> (29.8 mg, 0.054 mmol, 1.0 equiv.) was dissolved in THF (2 mL) and added to the K[IrCp\*H<sub>3</sub>] solution. The solution quickly turned pale yellow and slightly opaque as KCl precipitated out of solution. After stirring at room

temperature for 2 h, the solvent was removed *in vacuo*. The crude solid was then triturated with *n*-hexane and the product was extracted with *n*-hexane (5 mL), filtered through Celite, and concentrated (ca. 1.5 mL). The resulting pale-yellow solution was cooled to -40 °C overnight, affording thin colorless plates (48.7 mg, 58% yield). X-ray quality crystals were grown by recrystallization of **2** in *n*-hexane at -40 °C. Mp ca. 171 °C (decomp.); <sup>1</sup>H NMR (600 MHz, C<sub>6</sub>D<sub>6</sub>): δ 2.08 (s, 60H, CH<sub>3</sub>), -11.31 (s, 12H, Th–H–Ir); <sup>13</sup>C NMR (600 MHz, C<sub>6</sub>D<sub>6</sub>): δ 90.45 (C<sub>5</sub>(CH<sub>3</sub>)<sub>5</sub>), 11.57 (C<sub>5</sub>(CH<sub>3</sub>)<sub>5</sub>); IR (Nujol mull on KBr): 2138 (m), 2026 (m), 1962 (s), 1072 (m), 1029 (m), 860 (w), 810 (m), 616 (w), 565 (w), 531 (w), 501 (w); IR (solution in C<sub>6</sub>D<sub>6</sub>, solvent subtracted): 2979 (w), 2958 (w), 2902 (m), 2849 (w), 1962 (s), 1475 (w), 1381 (m), 1073 (w), 1033 (m) cm<sup>-1</sup>. Anal. Calcd (%) for ThIr<sub>4</sub>C<sub>40</sub>H<sub>72</sub> (**2**): C, 30.92; H, 4.67. Found: C, 30.87; H, 4.59.

**{U[(μ<sub>2</sub>-H<sub>3</sub>)IrCp\*]<sub>2</sub>[(μ<sub>3</sub>-H<sub>2</sub>)IrCp\*]<sub>2</sub> (3):** *Method A:* IrCp\*H<sub>4</sub> (48.0 mg, 0.145 mmol, 6.0 equiv.) and U(Terph)<sub>3</sub> (61.3 mg, 0.049 mmol, 2.0 equiv.) (Terph = C<sub>6</sub>H<sub>3</sub>-2,6-(C<sub>6</sub>H<sub>4</sub>-4'-Bu)<sub>2</sub>) were dissolved in separate 20 mL scintillation vials in *n*-hexane (2 mL and 6 mL, respectively). Both solutions were cooled to -40 °C, then the solution of IrCp\*H<sub>4</sub> was added to the solution of U(Terph)<sub>3</sub>. The resulting black-yellow solution afforded black-yellow crystals of **3** (41.9 mg, 70% yield) after 18 h, which were rinsed with 2 × 2 mL *n*-hexane to remove any crystallized Terph–H. X-ray quality crystals were grown in a similar fashion at room temperature. Mp ca. 327 °C (decomp.); <sup>1</sup>H NMR (600 MHz, C<sub>6</sub>D<sub>6</sub>): δ 3.38 (s, 60H, CH<sub>3</sub> (Cp\*Ir<sub>terminal</sub>)), -0.11 (s, 30H, CH<sub>3</sub> (Cp\*Ir<sub>bridging</sub>)); <sup>13</sup>C NMR (600 MHz, C<sub>6</sub>D<sub>6</sub>): δ 112.63 (U<sub>2</sub>Ir(C<sub>5</sub>(CH<sub>3</sub>)<sub>5</sub>)), 105.44 (Ir(C<sub>5</sub>(CH<sub>3</sub>)<sub>5</sub>)), 5.08 (C<sub>5</sub>(CH<sub>3</sub>)<sub>5</sub>); IR (Nujol mull on KBr): 1951 (s), 1071 (w), 1031 (m), 793 (w), 628 (w), 585 (w) cm<sup>-1</sup>. Anal. Calcd (%) for U<sub>2</sub>Ir<sub>6</sub>C<sub>60</sub>H<sub>106</sub> (**3**): C, 29.33; H, 4.35. Found: C, 29.60; H, 4.39.

*Method B:* IrCp\*H<sub>4</sub> (19.9 mg, 0.060 mmol, 6.0 equiv.) and benzyl potassium (8.1 mg, 0.062 mmol, 6.2 equiv.) were added to a 20 mL scintillation vial with THF (2 mL) to generate a solution of K[IrCp\*H<sub>3</sub>]. UI<sub>3</sub>(THF)<sub>4</sub> (18.2 mg, 0.020 mmol, 2.0 equiv.) was dissolved in THF (2 mL) and added to the K[IrCp\*H<sub>3</sub>] solution. The solution quickly turned cloudy yellow-brown and slightly opaque as KI precipitated out of solution. After stirring at room temperature for 1 h, the solvent was removed *in vacuo*. The crude solid was extracted in toluene, filtered through Celite, and dried *in vacuo*, affording **3** as a yellow-brown powder (17.1 mg, 70% yield). A slight impurity was detectable in the IR spectrum, corresponding to the peak at 2159 cm<sup>-1</sup>; this peak is detectable but much smaller in the IR spectrum from Method A. <sup>1</sup>H NMR (400 MHz, C<sub>6</sub>D<sub>6</sub>): δ 3.35 (s, 60H, CH<sub>3</sub> (Cp\*Ir<sub>terminal</sub>)), -0.10 (s, 30H, CH<sub>3</sub> (Cp\*Ir<sub>bridging</sub>)); IR (Nujol mull on KBr): 2159 (m), 1956 (s), 1071 (w), 1032 (m), 813 (m), 564 (w) cm<sup>-1</sup>. Anal. Calcd (%) for U<sub>2</sub>Ir<sub>6</sub>C<sub>60</sub>H<sub>106</sub> (**3**): C, 29.33; H, 4.35. Found: C, 29.49; H, 3.96.

**H<sub>2</sub> Monitoring in the Synthesis of 3:** IrCp\*H<sub>4</sub> (13.7 mg) and U(Terph)<sub>3</sub> (17.3 mg) were each dissolved in 0.75 mL C<sub>6</sub>D<sub>6</sub>. The solution of IrCp\*H<sub>4</sub> was added to a J. Young NMR tube, followed by a buffer layer of 0.5 mL C<sub>6</sub>D<sub>6</sub>, with the U(Terph)<sub>3</sub> solution layered on top of that. The remaining headspace of the tube was filled with C<sub>6</sub>D<sub>6</sub>, after which the tube was sealed, inverted 10 times, and then allowed to sit for 20 minutes before the <sup>1</sup>H NMR spectrum was measured.

**Magnetism measurements:** Samples of  $\text{UIr}_4$  (7.1 mg) and  $\text{U}_2\text{Ir}_6$  (5.4 mg) were loaded into 3 mm (O.D.) quartz tubes and sandwiched between two pieces of quartz wool ( $\text{UIr}_4$ , 4.1 mg;  $\text{U}_2\text{Ir}_6$ , 6.3 mg) by a modified literature procedure.<sup>6–8</sup> Outside the glovebox, a pre-weighed amount of quartz wool, which had previously been leached with oxalic and hydrochloric acid, was inserted and packed into a quartz tube with quartz rods. Afterwards, the tubes were oven-dried for 24 h at 150 °C. Inside a glovebox, two 0.075” (O.D.) polyimide liners were placed inside both ends of the tube. A mild vacuum was applied to one end, such that no quartz wool was pushed out; the other end was used to vacuum sample into tube landing onto the quartz wool without touching the sidewalls. The polyimide liners were removed, and a second piece of quartz wool was inserted into the tube on top of the compound. The sample was compressed into a pellet with two quartz rods. The ends of the tube were capped with two 5 mm NMR tube rubber septa. The capped tubes were removed from the glovebox and surveyed for any contamination. The center of the tube was wrapped with a piece of open-cell foam, saturated with liquid nitrogen, and the ends were flame-sealed with a propane/oxygen torch. Variable temperature magnetization data were recorded from 2–300 K at 1, 2, and 4 T with a 7 T Quantum Design MPMS magnetometer utilizing a superconducting quantum interference device (SQUID). Molar susceptibility,  $\chi_m$ , was calculated using the formula:

$$\chi_m = \frac{MW}{m} \left[ \frac{M_{meas} - M_{imp}}{H} - \chi_{QW} \right] - \chi_d$$

Where  $MW$  is the molecular weight of the sample;  $m$  is the mass of the sample;  $M_{meas}$  is the measured magnetization;  $M_{imp}$  is the magnetization due to an assumed ferromagnetic impurity;  $H$  is the applied field; and  $\chi_{QW}$  as well as  $\chi_d$  are the diamagnetic corrections due to the quartz wool and the sample, respectively, calculated from Pascal’s constants.<sup>9</sup> The different applied fields were chosen to saturate  $M_{imp}$  so that its field dependence could be treated as a constant. The value of  $M_{imp}$  was allowed to vary to minimize the least squares difference of  $\chi_m \cdot T$  between the measured fields from 100–300 K.

## UV-Vis Spectra

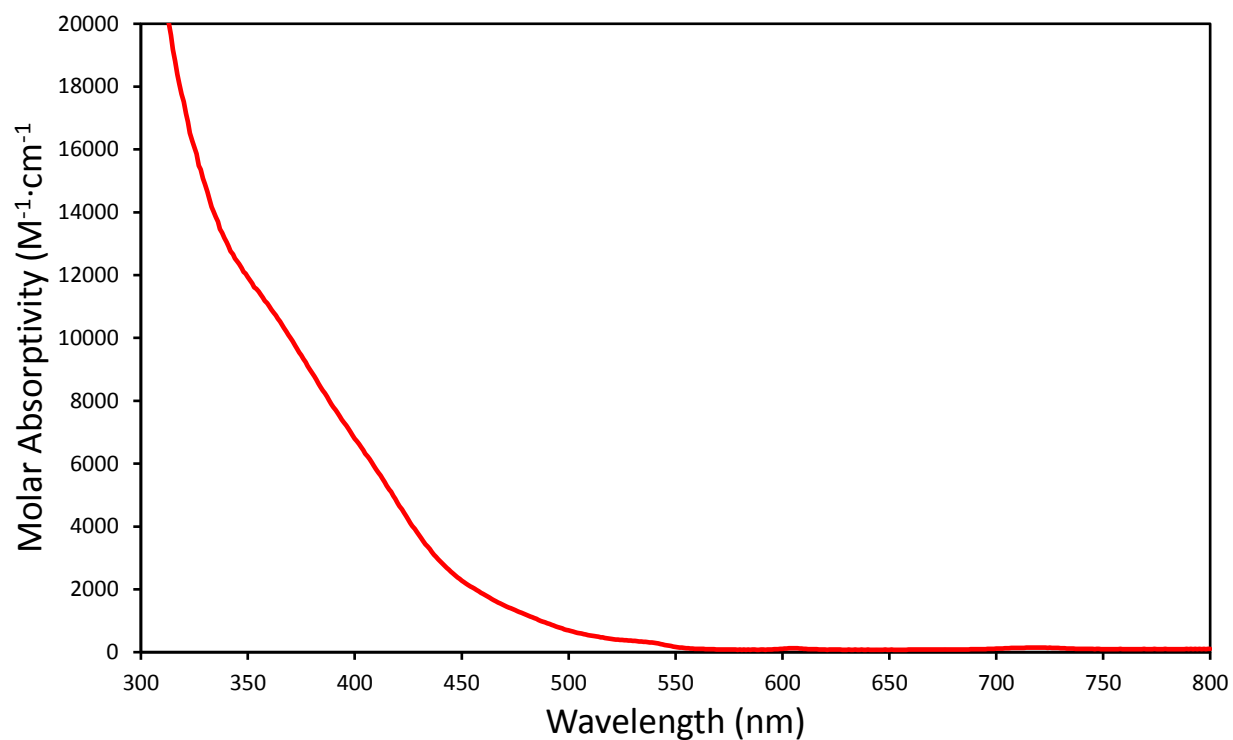

**Figure S1.** UV-Vis spectrum of **1** in toluene

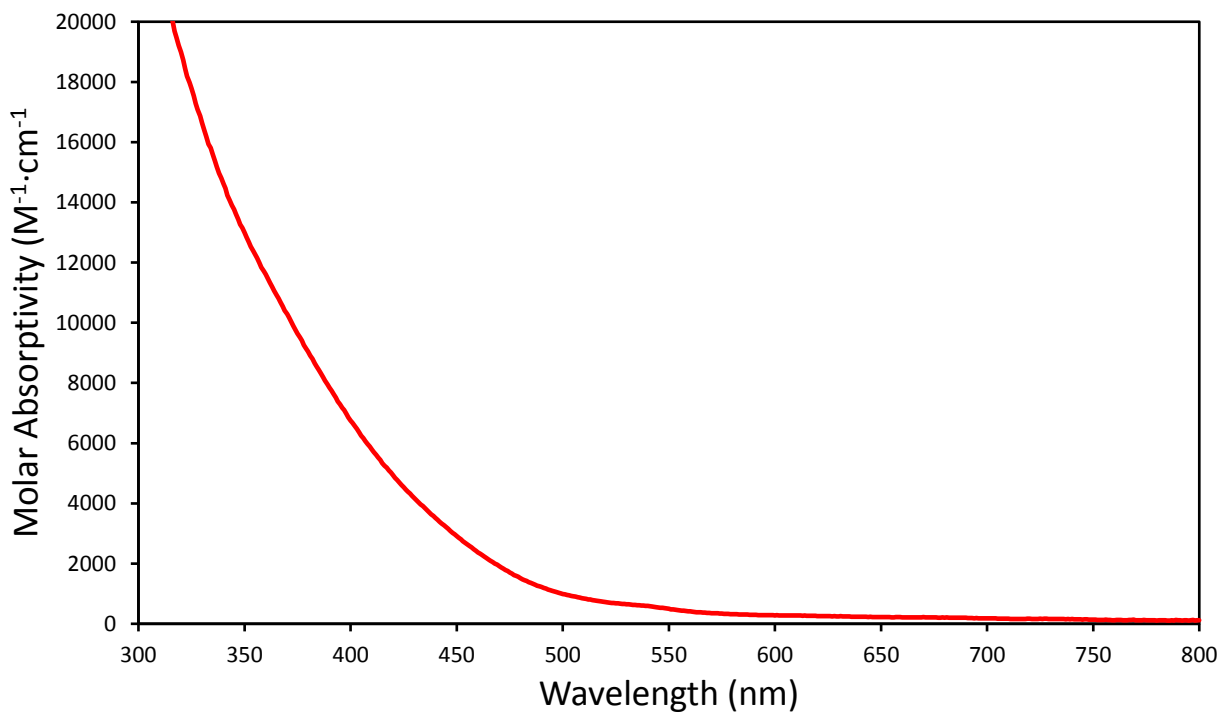

**Figure S2.** UV-Vis spectrum of **3** in toluene

## IR Spectra

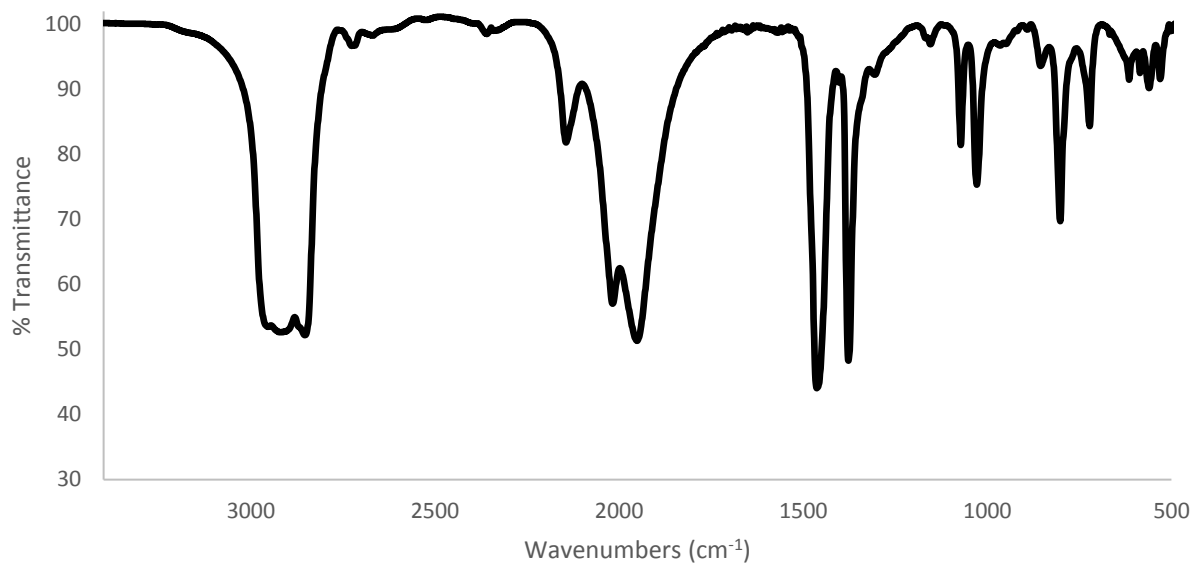

**Figure S3.** IR spectrum of **1** (Nujol mull)

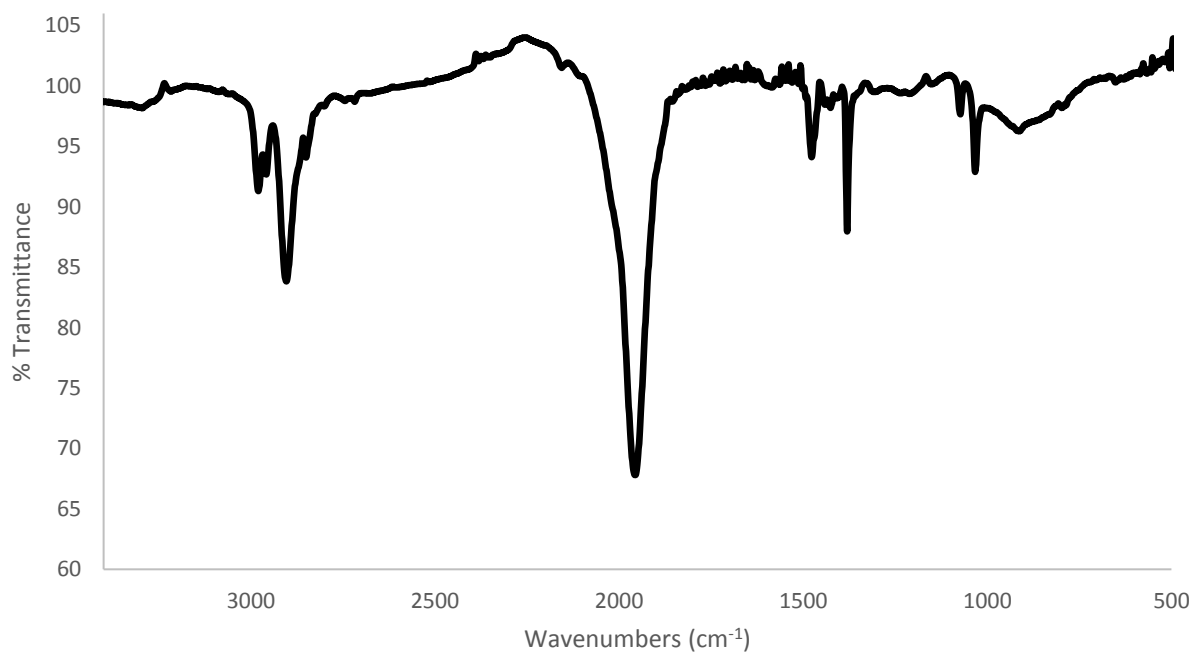

**Figure S4.** IR spectrum of **1** (in C<sub>6</sub>D<sub>6</sub>, solvent subtracted)

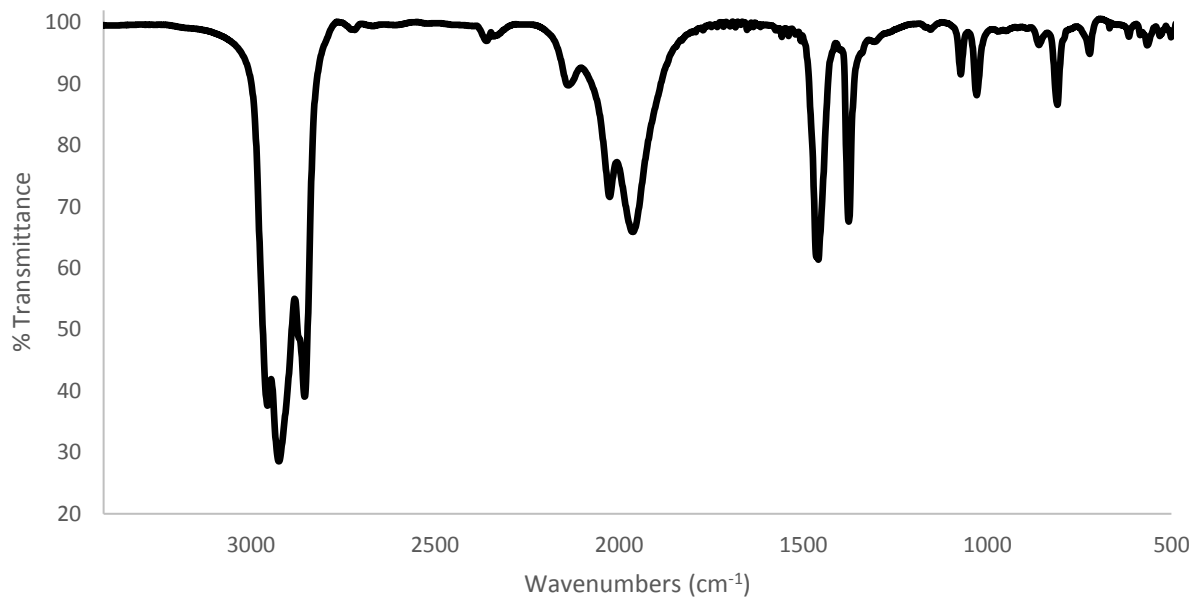

**Figure S5.** IR spectrum of **2** (Nujol mull)

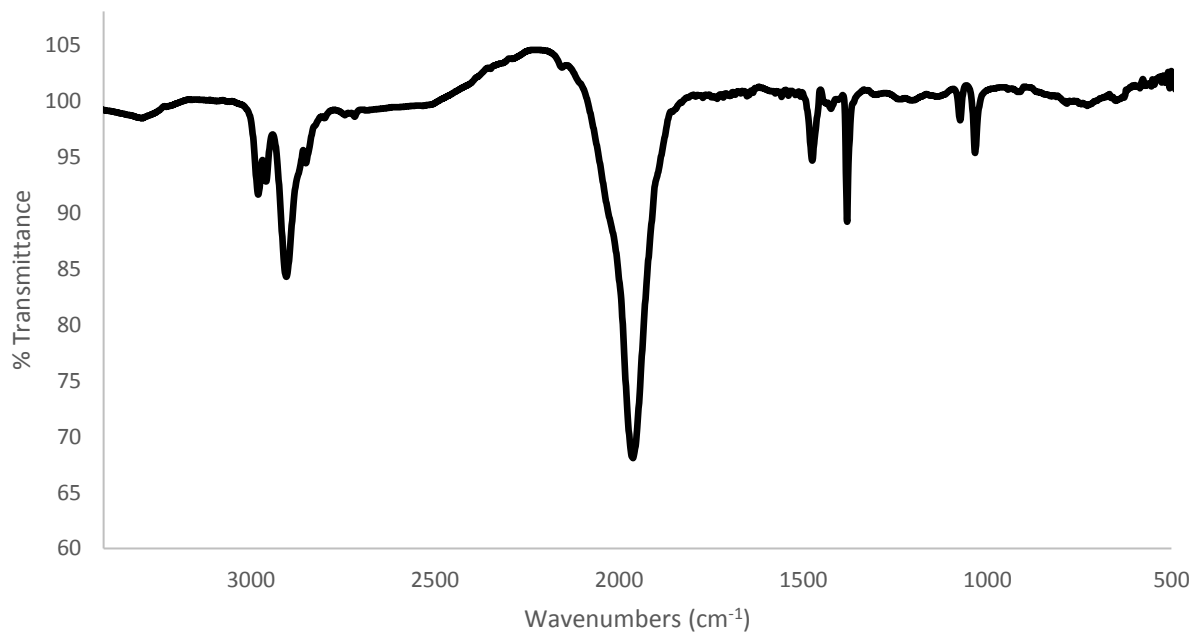

**Figure S6.** IR spectrum of **2** (in  $C_6D_6$ , solvent subtracted)



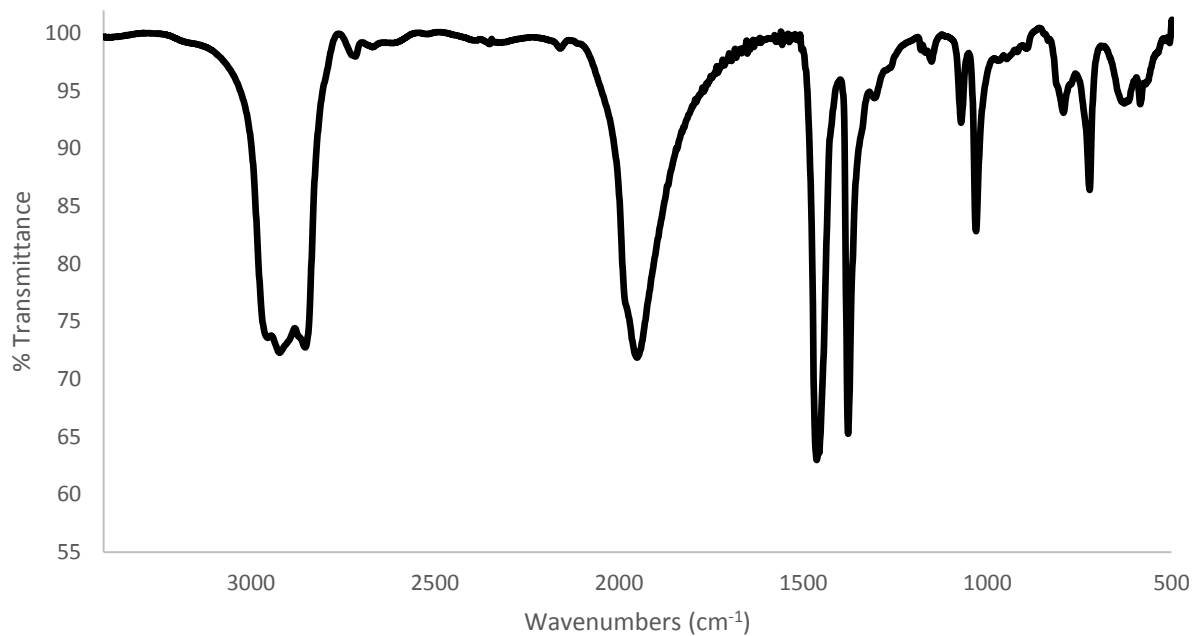

**Figure S7.** IR spectrum of **3**, synthesized by Method A (Nujol mull)

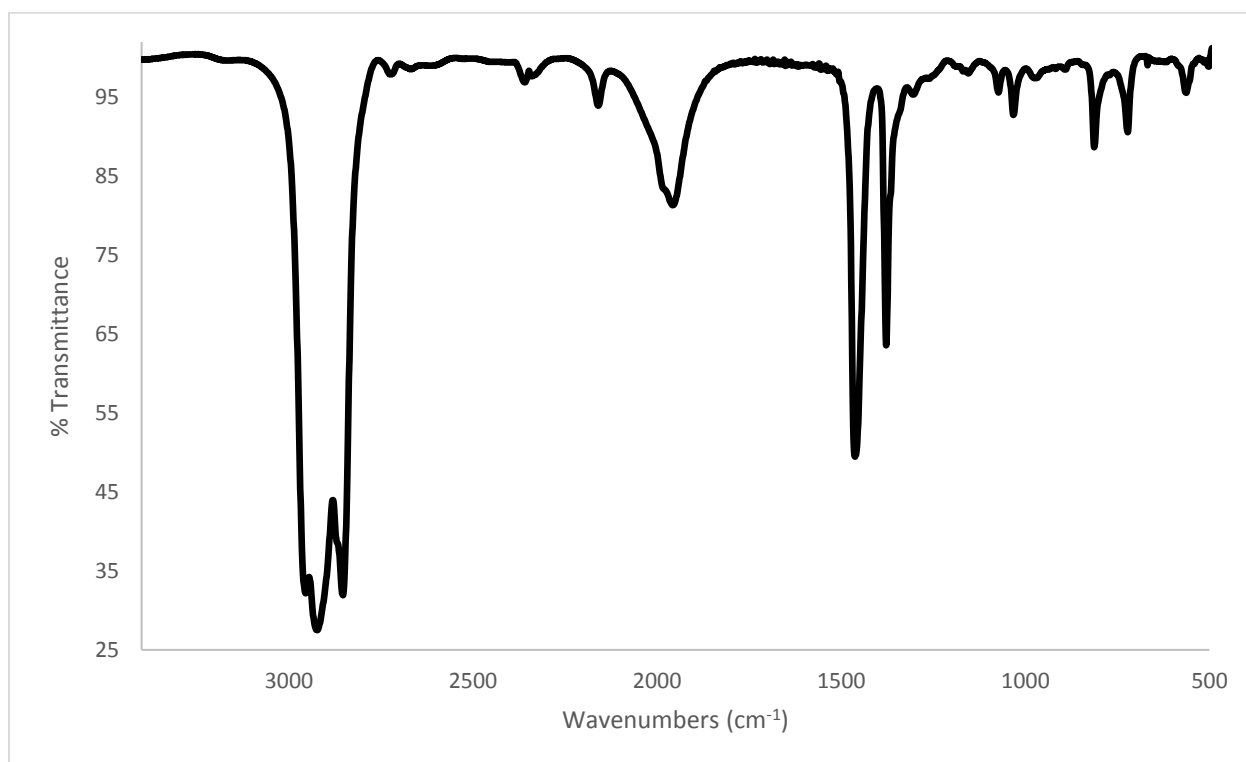

**Figure S8.** IR spectrum of **3**, synthesized by Method B (Nujol mull)

## NMR Spectra

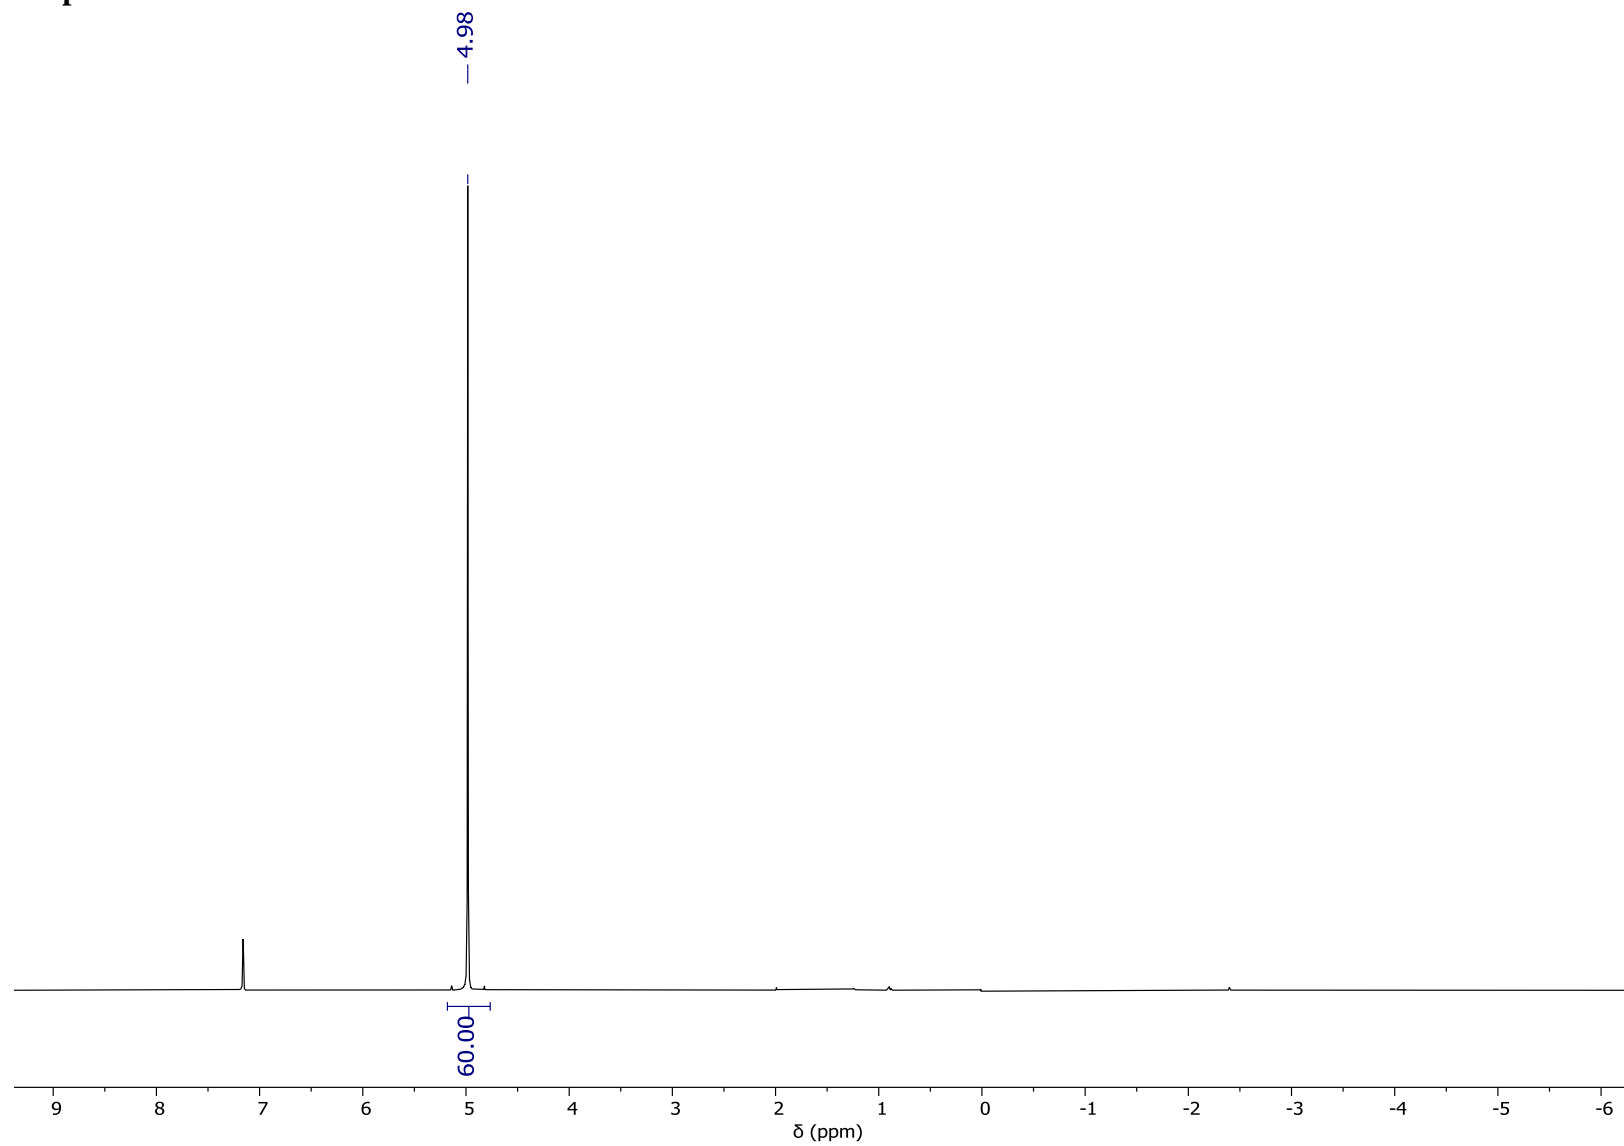

**Figure S9.**  $^1\text{H}$  NMR spectrum of **1** in  $\text{C}_6\text{D}_6$  after initial crystallization from *n*-hexane.

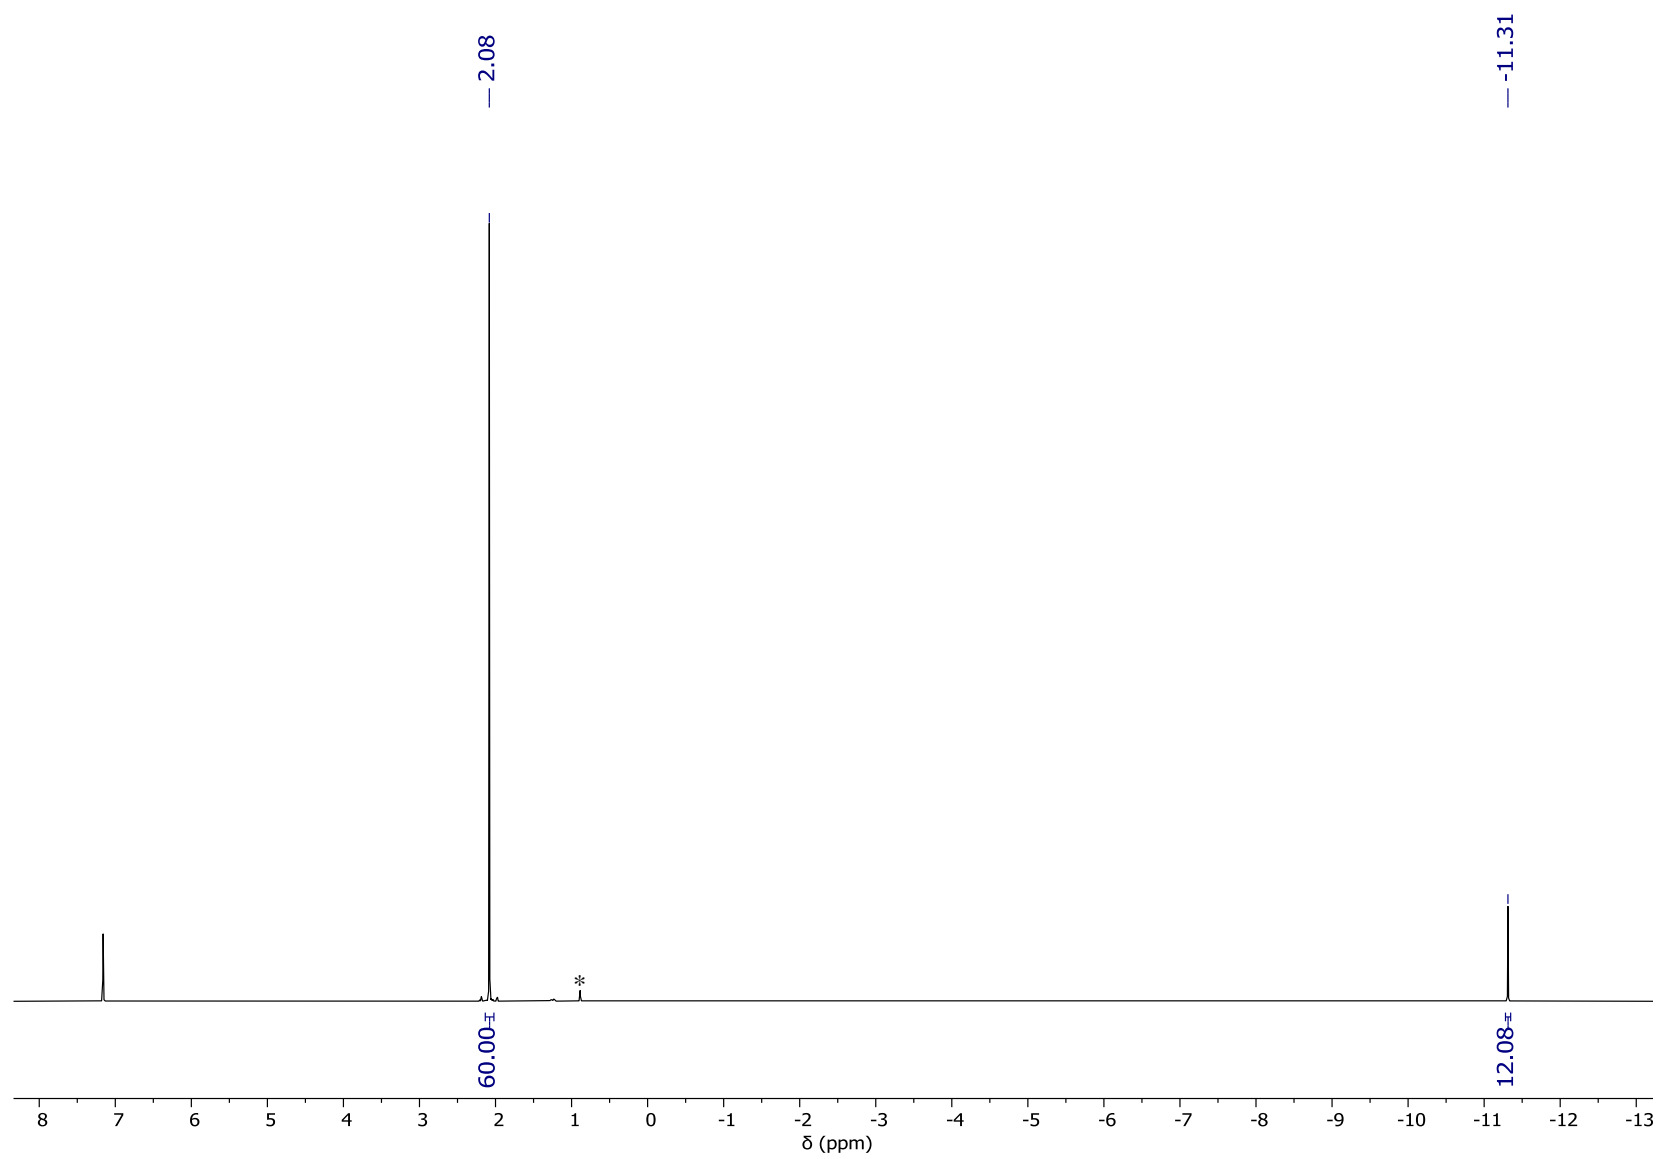

**Figure S10.**  $^1\text{H}$  NMR spectrum of **2** in  $\text{C}_6\text{D}_6$  after initial crystallization from *n*-hexane; \* = *n*-hexane.

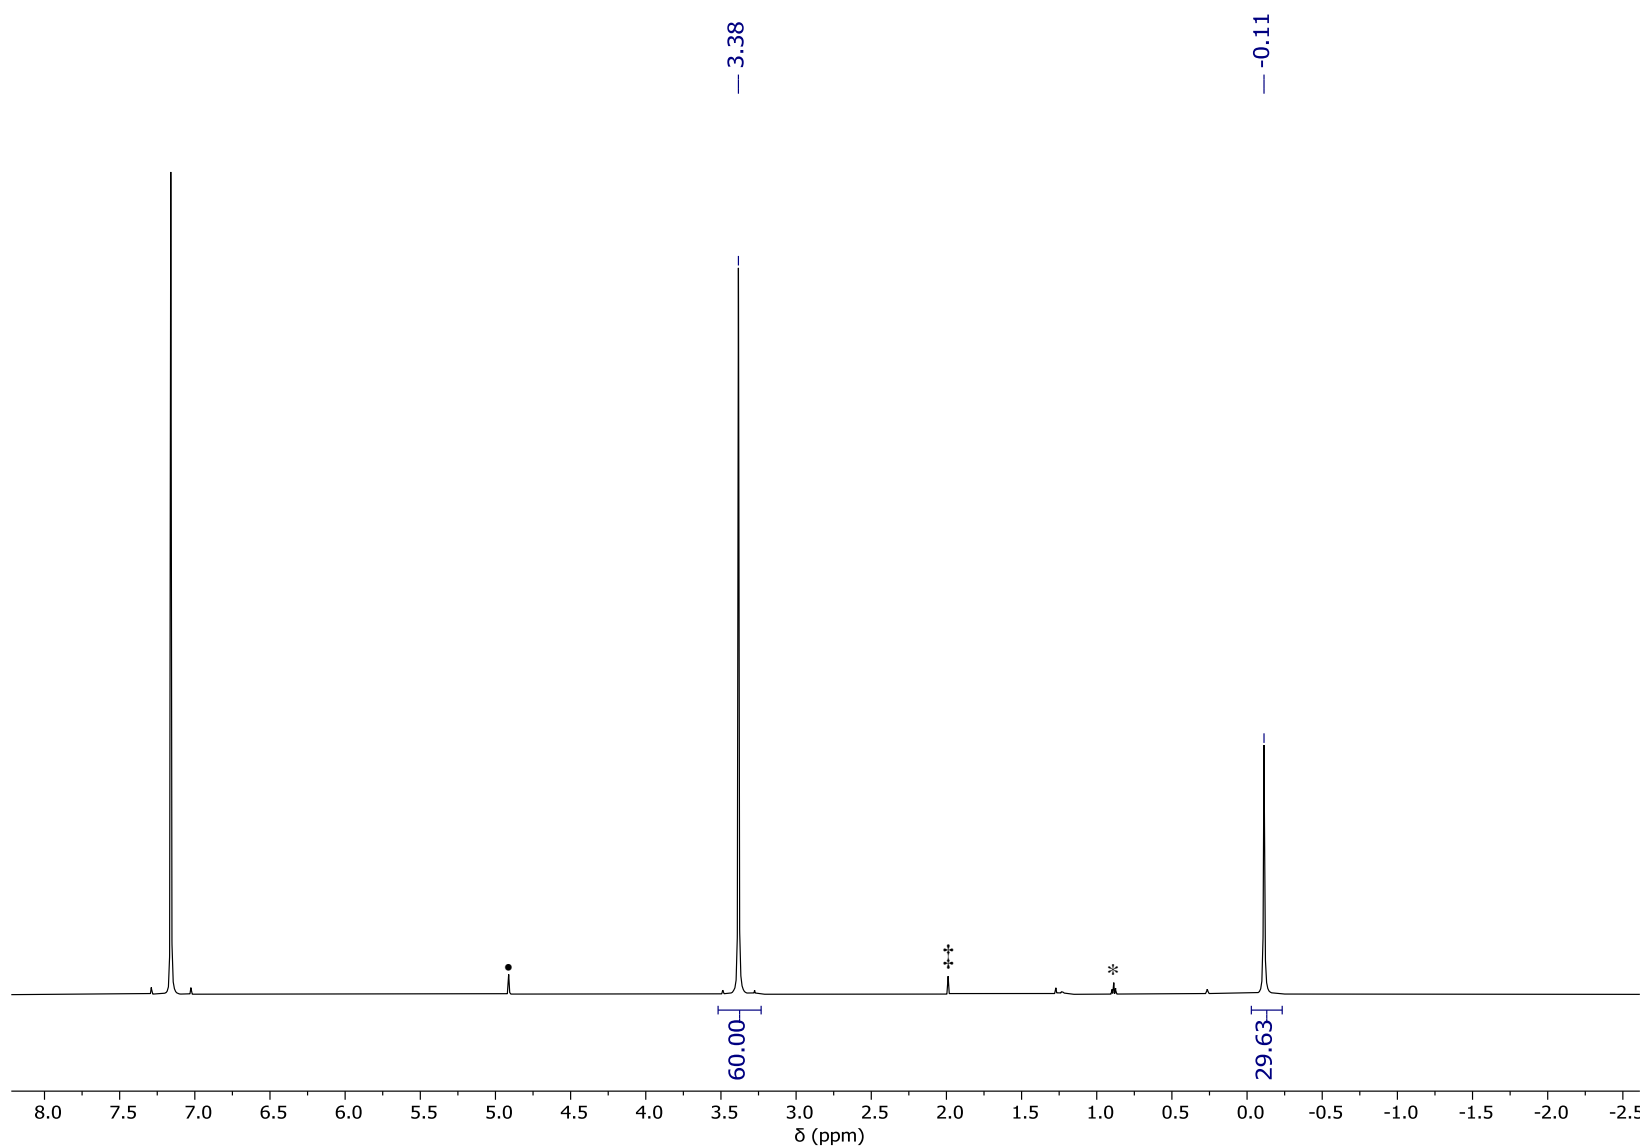

**Figure S11.**  $^1\text{H}$  NMR spectrum in  $\text{C}_6\text{D}_6$  of **3** after crystallization from  $n$ -hexane;  $\ddagger$  =  $\text{IrCp}^*\text{H}_4$ ,  $*$  =  $n$ -hexane,  $\bullet$  = impurity of varying concentration, most likely **1** or a similar species formed by the slight decomposition of **3**.

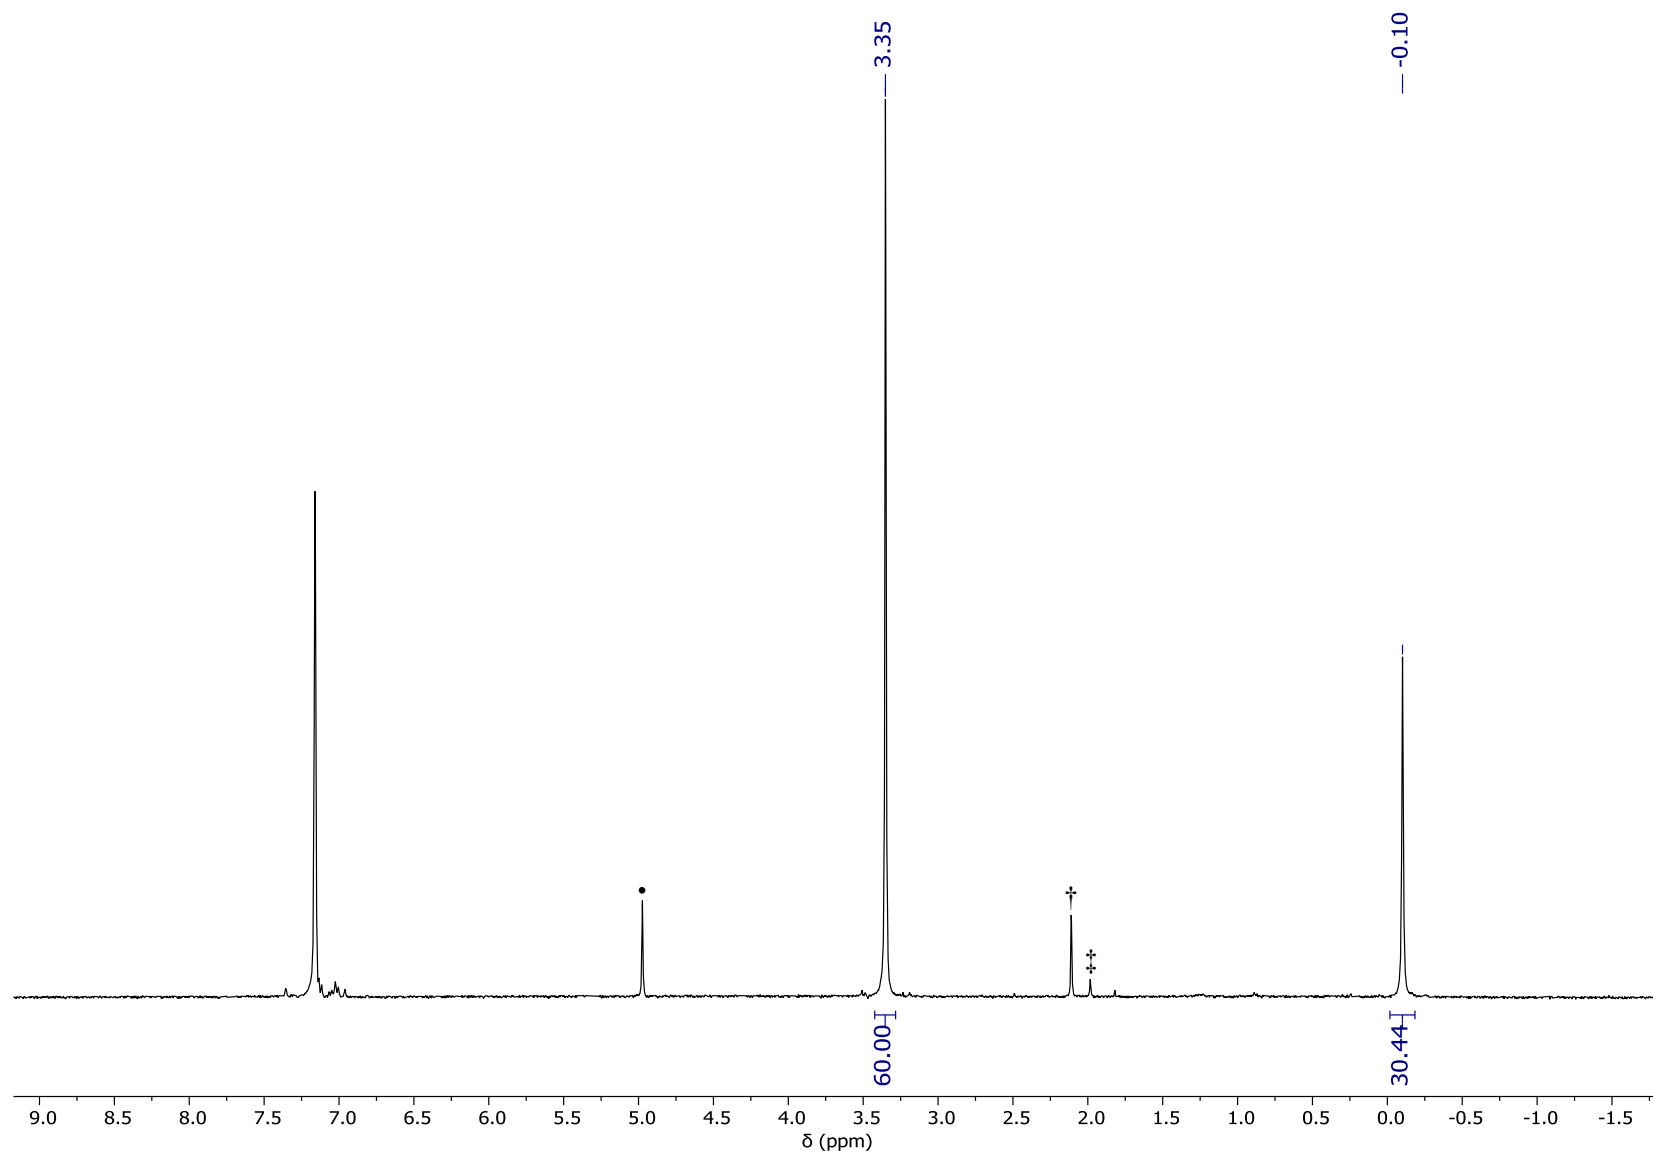

**Figure S12.**  $^1\text{H}$  NMR spectrum in  $\text{C}_6\text{D}_6$  of **3** after extraction from toluene and drying *in vacuo*; † = toluene, ‡ =  $\text{IrCp}^*\text{H}_4$ , • = impurity of varying concentration, most likely **1** or a similar species formed by the slight decomposition of **3**.

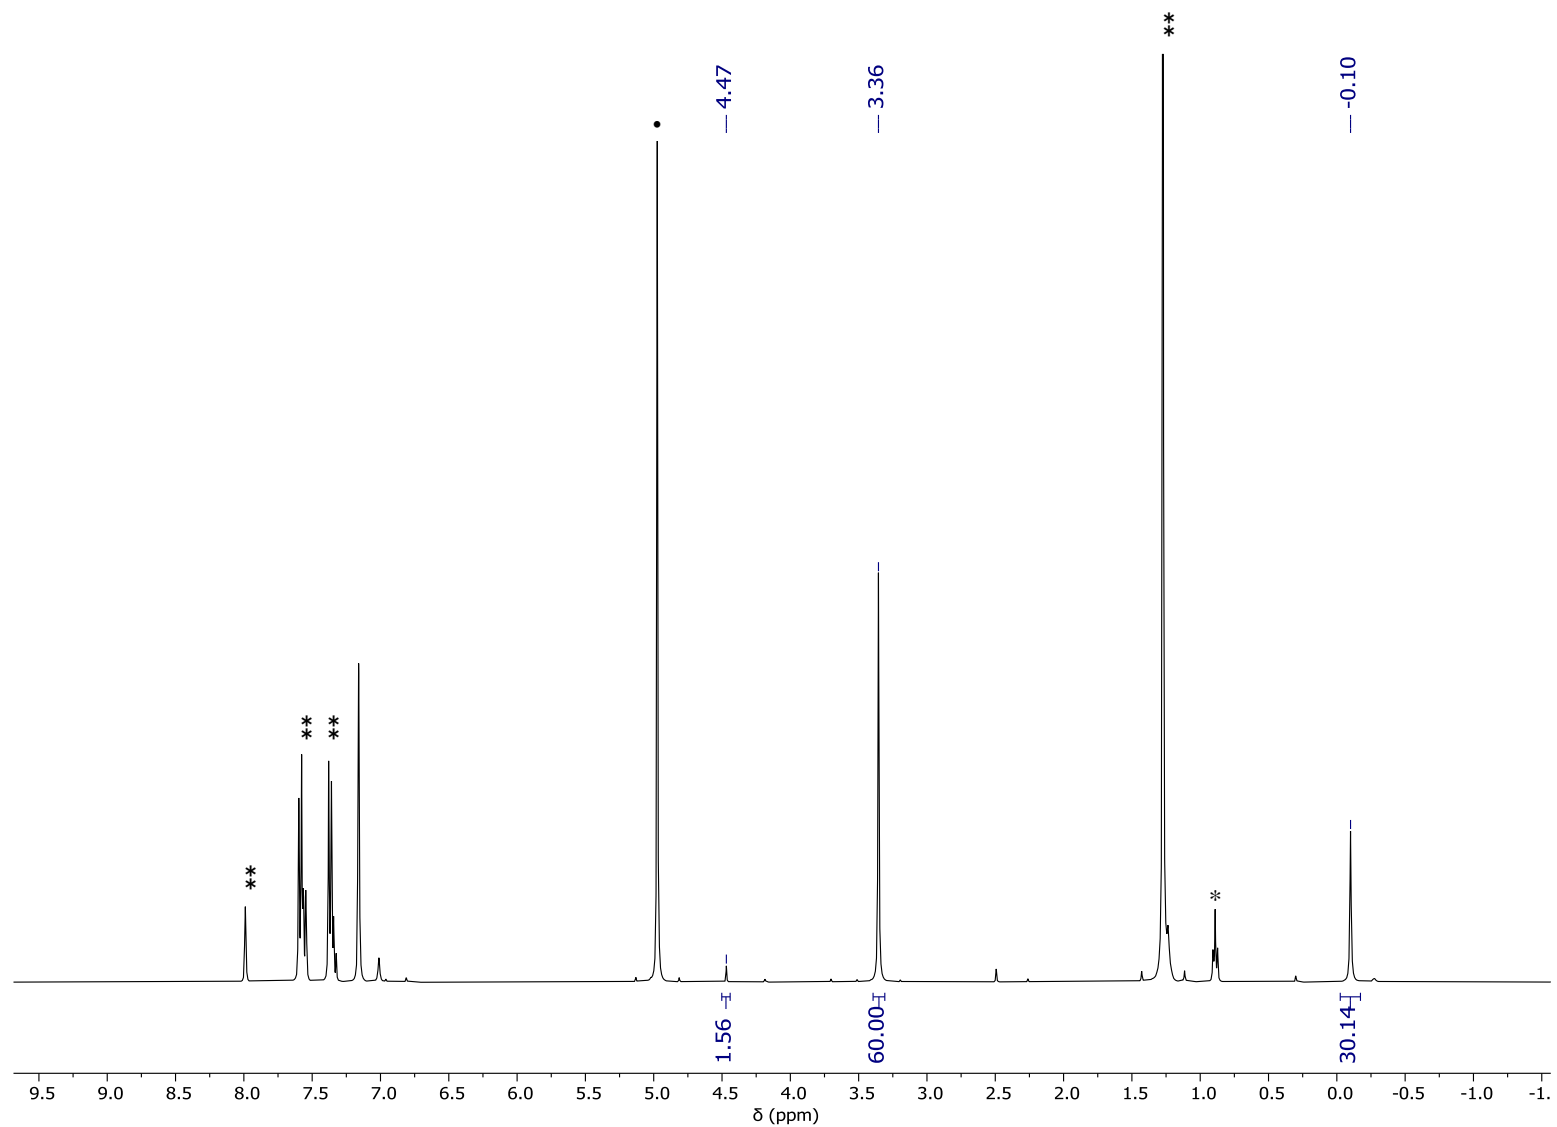

**Figure S13.** No-headspace  $^1\text{H}$  NMR spectrum of the synthesis of **3** from  $\text{Cp}^*\text{IrH}_4$  and  $\text{U}(\text{Terph})_3$  in  $\text{C}_6\text{D}_6$ , showing the presence of  $\text{H}_2$ ; \* = *n*-hexane, • = impurity of varying concentration, most likely **1** or a similar species formed by the slight decomposition of **3**, \*\* = Terph-H

**Table S1.** Crystallographic data for  $U\{(\mu-H)_3IrCp^*\}_4 \cdot C_6H_{14}$  (**1**· $C_6H_{14}$ )

|                                         |                                                                    |                              |
|-----------------------------------------|--------------------------------------------------------------------|------------------------------|
| Empirical formula                       | $C_{46}H_{74}Ir_4U^*$                                              |                              |
| Formula weight                          | 1633.88*                                                           |                              |
| Color, habit                            | Orange, rod                                                        |                              |
| Temperature                             | 100(2) K                                                           |                              |
| Wavelength                              | 0.71073 Å                                                          |                              |
| Crystal system                          | Monoclinic                                                         |                              |
| Space group                             | C 2/c                                                              |                              |
| Unit cell dimensions                    | $a = 14.8239(6)$ Å                                                 | $\alpha = 90^\circ$ .        |
|                                         | $b = 21.1789(6)$ Å                                                 | $\beta = 107.318(5)^\circ$ . |
|                                         | $c = 17.2427(8)$ Å                                                 | $\gamma = 90^\circ$ .        |
| Volume                                  | $5168.0(4)$ Å <sup>3</sup>                                         |                              |
| Z                                       | 4                                                                  |                              |
| Density (calculated)                    | $2.100$ Mg/m <sup>3</sup>                                          |                              |
| Absorption coefficient                  | $13.411$ mm <sup>-1</sup>                                          |                              |
| $F(000)$                                | 3000.0                                                             |                              |
| Crystal size                            | $0.3 \times 0.08 \times 0.08$ mm <sup>3</sup>                      |                              |
| Theta range for data collection         | $3.195$ to $29.673^\circ$                                          |                              |
| Index ranges                            | $-18 \leq h \leq 18$ , $-26 \leq k \leq 26$ , $-21 \leq l \leq 21$ |                              |
| Reflections collected                   | 31322                                                              |                              |
| Independent reflections                 | 5280 [ $R_{int} = 0.0472$ ]                                        |                              |
| Completeness to $\theta = 25.242^\circ$ | 99.8 %                                                             |                              |
| Absorption correction                   | Semi-empirical from equivalents                                    |                              |
| Max. and min. transmission              | 1.0000 and 0.1324                                                  |                              |
| Refinement method                       | Full-matrix least-squares on $F^2$                                 |                              |
| Data / restraints / parameters          | 5280 / 48 / 290                                                    |                              |
| Goodness-of-fit on $F^2$                | 1.389                                                              |                              |
| Final $R$ indices [ $I > 2\sigma(I)$ ]  | $R_1 = 0.0376$ , $wR_2 = 0.0949$                                   |                              |
| $R$ indices (all data)                  | $R_1 = 0.0400$ , $wR_2 = 0.0956$                                   |                              |
| Largest diff. peak and hole             | $1.361$ and $-2.043$ e·Å <sup>-3</sup>                             |                              |

\*The presumed 12 hydrides were not located, hence the reduced empirical formula and formula weight

**Table S2.** Crystallographic data for Th{[( $\mu$ -H<sub>2</sub>)(H)IrCp\*]<sub>2</sub>[( $\mu$ -H)<sub>3</sub>IrCp\*]<sub>2</sub>} (2)

|                                        |                                                                                                                                        |
|----------------------------------------|----------------------------------------------------------------------------------------------------------------------------------------|
| Empirical formula                      | C <sub>40</sub> H <sub>60</sub> Ir <sub>4</sub> Th*                                                                                    |
| Formula weight                         | 1541.72*                                                                                                                               |
| Color, habit                           | Colorless, plate                                                                                                                       |
| Temperature                            | 100(2) K                                                                                                                               |
| Wavelength                             | 0.7288 Å                                                                                                                               |
| Crystal system                         | Monoclinic                                                                                                                             |
| Space group                            | P 2 <sub>1</sub> /n                                                                                                                    |
| Unit cell dimensions                   | $a = 13.6424(17)$ Å $\alpha = 90^\circ$ .<br>$b = 19.070(2)$ Å $\beta = 102.339(6)^\circ$ .<br>$c = 17.520(2)$ Å $\gamma = 90^\circ$ . |
| Volume                                 | 4452.8(10) Å <sup>3</sup>                                                                                                              |
| Z                                      | 4                                                                                                                                      |
| Density (calculated)                   | 2.300 Mg/m <sup>3</sup>                                                                                                                |
| Absorption coefficient                 | 16.233 mm <sup>-1</sup>                                                                                                                |
| $F(000)$                               | 2792.0                                                                                                                                 |
| Crystal size                           | 0.12 × 0.12 × 0.005 mm <sup>3</sup>                                                                                                    |
| Theta range for data collection        | 3.278 to 27.097°                                                                                                                       |
| Index ranges                           | -17 ≤ $h$ ≤ 16, 0 ≤ $k$ ≤ 23, 0 ≤ $l$ ≤ 21                                                                                             |
| Reflections collected                  | 9167                                                                                                                                   |
| Independent reflections                | 9167 [ $R_{int} = 0.0518$ ]                                                                                                            |
| Completeness to theta = 25.242°        | 99.8 %                                                                                                                                 |
| Absorption correction                  | Semi-empirical from equivalents                                                                                                        |
| Max. and min. transmission             | 0.7472 and 0.4006                                                                                                                      |
| Refinement method                      | Full-matrix least-squares on $F^2$                                                                                                     |
| Data / restraints / parameters         | 9167 / 150 / 427                                                                                                                       |
| Goodness-of-fit on $F^2$               | 1.037                                                                                                                                  |
| Final $R$ indices [ $I > 2\sigma(I)$ ] | $R_1 = 0.0625$ , $wR_2 = 0.1430$                                                                                                       |
| $R$ indices (all data)                 | $R_1 = 0.1052$ , $wR_2 = 0.1750$                                                                                                       |
| Largest diff. peak and hole            | 3.44 and -3.01 e·Å <sup>-3</sup>                                                                                                       |

\*The presumed 12 hydrides were not located, hence the reduced empirical formula and formula weight



**Table S3.** Crystallographic data for  $\{U[(\mu_2\text{-H}_3)\text{IrCp}^*]_2[(\mu_3\text{-H}_2)\text{IrCp}^*]\}_2$  (**3**)

|                                        |                                                                    |                              |
|----------------------------------------|--------------------------------------------------------------------|------------------------------|
| Empirical formula                      | $\text{C}_{60}\text{H}_{90}\text{Ir}_6\text{U}_2^*$                |                              |
| Formula weight                         | 2440.57*                                                           |                              |
| Color, habit                           | Black, block                                                       |                              |
| Temperature                            | 100(2) K                                                           |                              |
| Wavelength                             | 0.71073 Å                                                          |                              |
| Crystal system                         | Triclinic                                                          |                              |
| Space group                            | P-1                                                                |                              |
| Unit cell dimensions                   | $a = 12.0833(2)$ Å                                                 | $\alpha = 93.815(1)^\circ$ . |
|                                        | $b = 15.2848(2)$ Å                                                 | $\beta = 98.607(1)^\circ$ .  |
|                                        | $c = 18.5723(3)$ Å                                                 | $\gamma = 93.365(1)^\circ$ . |
| Volume                                 | $3375.78(9)$ Å <sup>3</sup>                                        |                              |
| Z                                      | 2                                                                  |                              |
| Density (calculated)                   | $2.401$ Mg/m <sup>3</sup>                                          |                              |
| Absorption coefficient                 | $16.586$ mm <sup>-1</sup>                                          |                              |
| $F(000)$                               | 2192.0                                                             |                              |
| Crystal size                           | $0.20 \times 0.10 \times 0.08$ mm <sup>3</sup>                     |                              |
| Theta range for data collection        | $3.007$ to $26.370^\circ$                                          |                              |
| Index ranges                           | $-15 \leq h \leq 15$ , $-19 \leq k \leq 18$ , $-23 \leq l \leq 23$ |                              |
| Reflections collected                  | 69850                                                              |                              |
| Independent reflections                | 13763 [ $R_{int} = 0.0518$ ]                                       |                              |
| Completeness to theta = $25.242^\circ$ | 99.8 %                                                             |                              |
| Absorption correction                  | Semi-empirical from equivalents                                    |                              |
| Max. and min. transmission             | 1.0000 and 0.5156                                                  |                              |
| Refinement method                      | Full-matrix least-squares on $F^2$                                 |                              |
| Data / restraints / parameters         | 13763 / 0 / 643                                                    |                              |
| Goodness-of-fit on $F^2$               | 1.015                                                              |                              |
| Final $R$ indices [ $I > 2\sigma(I)$ ] | $R_1 = 0.0243$ , $wR_2 = 0.0579$                                   |                              |
| $R$ indices (all data)                 | $R_1 = 0.0297$ , $wR_2 = 0.596$                                    |                              |
| Largest diff. peak and hole            | $2.723$ and $-1.262$ e·Å <sup>-3</sup>                             |                              |

\*The presumed 16 hydrides were not located, hence the reduced empirical formula and formula weight

## Computational Details

All DFT calculations were carried out with the Gaussian 09 suite of programs.<sup>10</sup> Geometries were fully optimized in gas phase without symmetry constraints, employing the B3PW91 functional.<sup>11,12</sup> The nature of the extrema was verified by analytical frequency calculations. The calculation of electronic energies and enthalpies of the extrema of the potential energy surface (minima and transition states) were performed at the same level of theory as the geometry optimizations. IRC calculations were performed to confirm the connections of the optimized transition states. Uranium, thorium, and iridium atoms were treated with a small core effective core potential (60 MWB), associated with its adapted basis set<sup>13-15</sup> augmented for iridium atoms with a polarization function ( $\zeta_f = 0.938$ ).<sup>16</sup> For the other elements (H, C and N), Pople's double- $\zeta$  basis set 6-31G(d,p) was used.<sup>17-19</sup> Dispersion corrections were treated with the D3 version of Grimme's dispersion with Becke-Johnson damping.<sup>20</sup> The electronic charges (at the DFT level) were computed using the natural population analysis (NPA) technique.<sup>21</sup>

**Table S4.** Calculated and experimental bond distances and angles for **1**

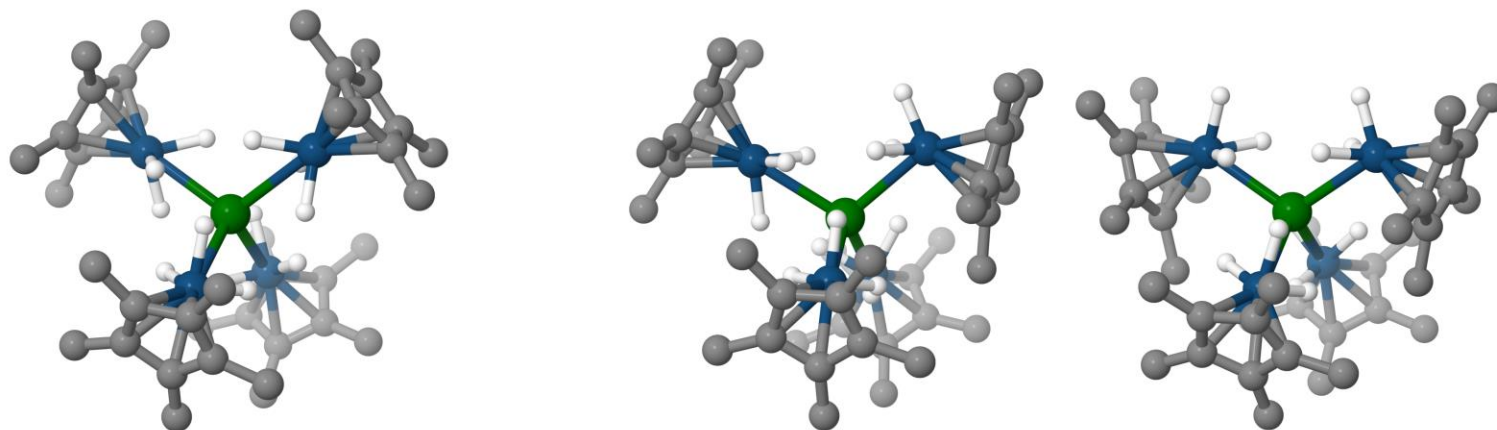

|                            | Linear                     |                            |                            |                            | Experimenta<br>1           | 1-Bent                     |                            | 2-Bent                         |                                        |
|----------------------------|----------------------------|----------------------------|----------------------------|----------------------------|----------------------------|----------------------------|----------------------------|--------------------------------|----------------------------------------|
| Multiplicity               | singlet                    | triplet                    | triplet<br>(disp)          | quintet                    | –                          | triplet                    | triplet<br>(disp)          | triplet                        | triplet<br>(disp)                      |
| $\Delta_r G$<br>(kcal/mol) | 30.3                       | 0.0                        | 0.0                        | 41.0                       | –                          | 10.3                       | 6.8                        | 18.2                           | 4.0                                    |
| Ir–H dist.<br>(Å)          | [1.623–1.629]              | [1.625–1.628]              | [1.624–1.629]              | [1.578–<br>1.655]          | –                          | 1.583<br>[1.618–1.629]     | 1.584<br>[1.616–1.629]     | [1.581–1.582]<br>[1.615–1.627] | [1.582–<br>1.583]<br>[1.617–<br>1.626] |
| U–H dist.<br>(Å)           | [2.339–2.365]              | [2.353–2.467]              | [2.326–2.350]              | [2.387–<br>2.735]          | –                          | [2.342–2.398]<br>3.569     | [2.319–2.406]<br>3.641     | [2.352–2.390]<br>[3.436–3.487] | [2.325–<br>2.414]<br>[3.607–<br>3.617] |
| U–Ir dist.<br>(Å)          | 2.941/2.941<br>2.940/2.942 | 2.954/2.956<br>2.951/2.952 | 2.905/2.907<br>2.912/2.913 | 3.032/3.033<br>3.056/3.175 | 2.951/2.959<br>2.951/2.959 | 2.921/2.934<br>2.961/2.964 | 2.849/2.891<br>2.920/2.922 | 2.901/2.903<br>2.973/2.973     | 2.828/2.831<br>2.930/2.932             |
| Ir–U–Ir<br>angle (°)       | [108.0–111.5]              | [108.8–110.4]              | [106.8–111.4]              | [109.6–<br>116.7]          | [102.8–118.9]              | [108.6–110.7]              | [106.9–112.8]              | [107.1–110.8]                  | [107.6–<br>113.5]                      |

**Table S5.** Calculated NBO Wiberg Bond Indices for **1**

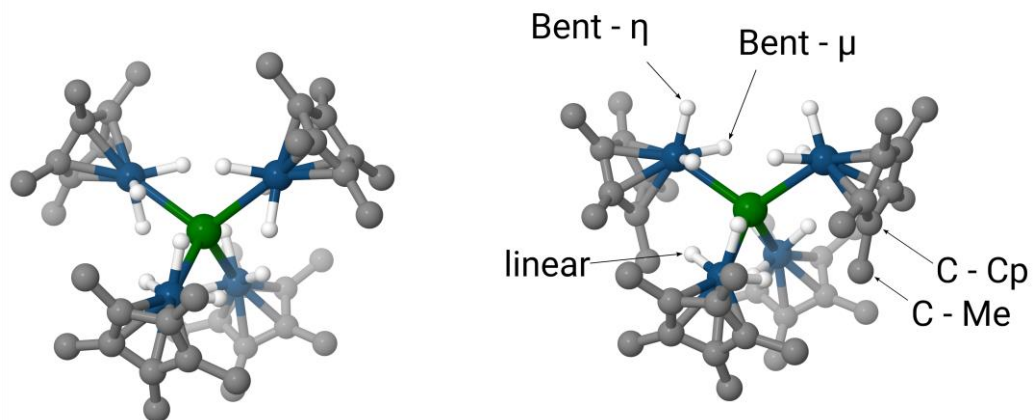

|            | Linear        |               | 2 - Bent                                                       |                                                                 |
|------------|---------------|---------------|----------------------------------------------------------------|-----------------------------------------------------------------|
|            | With disp     | Without disp  | With disp                                                      | Without disp                                                    |
| U – Ir     | [0.96 - 0.98] | [0.94 - 0.95] | 0.79 (linear)<br>0.88 (bent)                                   | 0.69 (linear)<br>0.78 (bent)                                    |
| Ir – H     | 0.53          | 0.55          | 0.55 (linear)<br>0.56 (bent – $\mu$ )<br>0.70 (bent – $\eta$ ) | 0.57 (linear)<br>0.56 (bent – $\mu$ )<br>0.70 (bent – $\eta$ )  |
| U – H      | [0.28 – 0.30] | [0.27 - 0.29] | 0.27 (linear)<br>0.25 (bent – $\mu$ )<br>0.04 (bent – $\eta$ ) | 0.27 (linear)<br>0.26 (bent – $\mu$ )<br>0.051 (bent – $\eta$ ) |
| C(Cp*) – U | –             | –             | 0.08 (C – Cp)<br>0.01 (C – Me)                                 | 0.07 (C – Cp)<br>0.00 (C – Me)                                  |

**Table S6.** Tabulated calculated bond distances/angles for **2**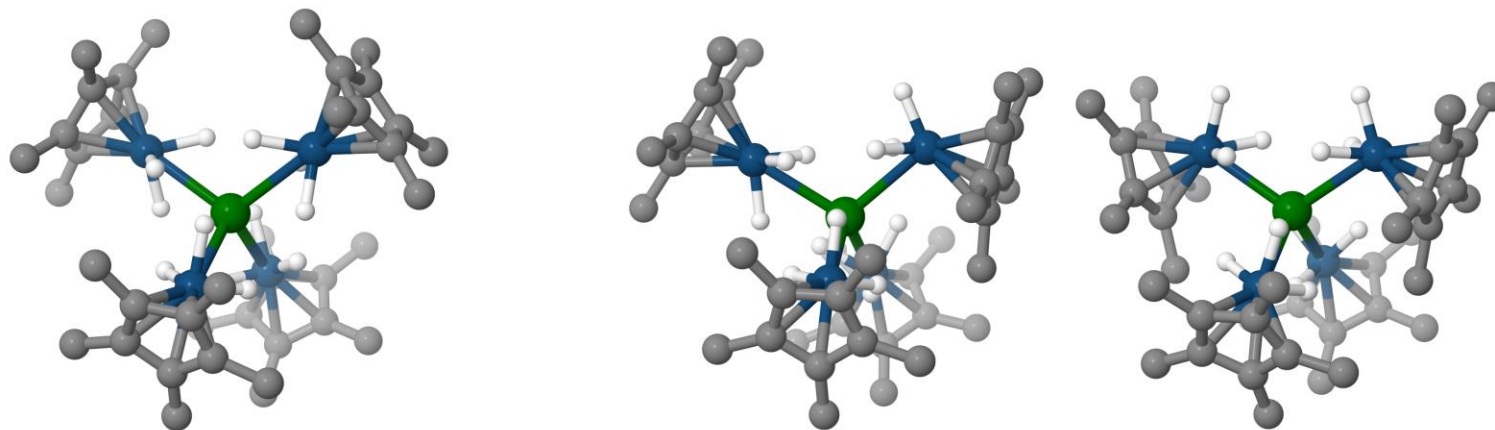

|                         | Linear                     |                            | Experimental               | 1-Bent                     |                            | 2-Bent                         |                                |
|-------------------------|----------------------------|----------------------------|----------------------------|----------------------------|----------------------------|--------------------------------|--------------------------------|
| Multiplicity            | singlet                    | singlet (disp)             | –                          | singlet                    | singlet (disp)             | singlet                        | singlet (disp)                 |
| $\Delta_r G$ (kcal/mol) | 0.0                        | 0.0                        | –                          | 8.5                        | –4.3                       | 16.4                           | –9.4                           |
| Ir–H dist. (Å)          | [1.624–1.625]              | [1.623–1.625]              | –                          | 1.583<br>[1.618–1.629]     | 1.584<br>[1.616–1.629]     | [1.581–1.582]<br>[1.615–1.627] | [1.582–1.583]<br>[1.617–1.626] |
| Th–H dist. (Å)          | [2.426–2.440]              | [2.404–2.420]              | –                          | [2.342–2.398]<br>3.569     | [2.319–2.406]<br>3.641     | [2.352–2.390]<br>[3.436–3.487] | [2.325–2.414]<br>[3.607–3.617] |
| Th–Ir dist. (Å)         | 3.022/3.022<br>3.022/3.022 | 2.978/2.978<br>2.979/2.979 | 2.964/2.983<br>3.010/3.015 | 2.984/3.005<br>3.024/3.036 | 2.916/2.964<br>2.985/2.988 | 2.964/2.970<br>3.036/3.047     | 2.899/2.902<br>2.995/2.999     |
| Ir–Th–Ir angle (°)      | [109.0–110.1]              | [108.8–110.3]              | [107.5–113.0]              | [107.9–111.3]              | [107.6–112.8]              | [108.3–111.1]                  | [107.5–114.4]                  |

**Table S7.** Calculated NBO Wiberg Bond Indexes for **2**

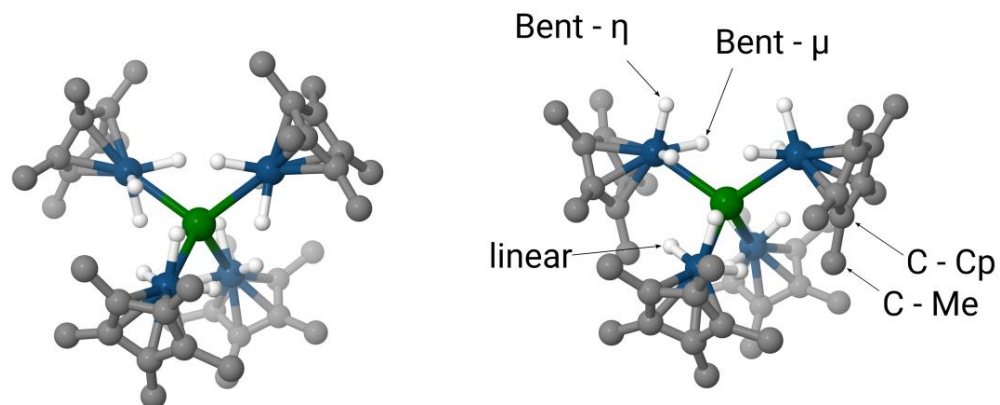

|             | Linear    |              | 2 - Bent                                            |                                                     |
|-------------|-----------|--------------|-----------------------------------------------------|-----------------------------------------------------|
|             | With disp | Without disp | With disp                                           | Without disp                                        |
| Th – Ir     | 0.65      | 0.63         | 0.63 (linear)<br>0.65 (Bent)                        | 0.60 (linear)<br>0.69 (Bent)                        |
| Ir – H      | 0.56      | 0.57         | 0.57 (linear)<br>0.58 (Bent – μ)<br>0.70 (Bent - η) | 0.59 (linear)<br>0.59 (Bent – μ)<br>0.70 (Bent - η) |
| Th – H      | 0.27      | 0.26         | 0.25 (linear)<br>0.24 (Bent – μ)<br>0.05 (Bent - η) | 0.24 (linear)<br>0.24 (Bent – μ)<br>0.05 (Bent - η) |
| C(Cp*) – Th | –         | –            | 0.10 (C – Cp)<br>0.04 (C – Me)                      | 0.08 (C – Cp)<br>0.00 (C – Me)                      |

**Figure S14.** Renderings of the calculated HOMOs (2) or SOMOs (1) and LUMO (c) of linear and bent structures of **1** and **2** (isovalue = 0.03)

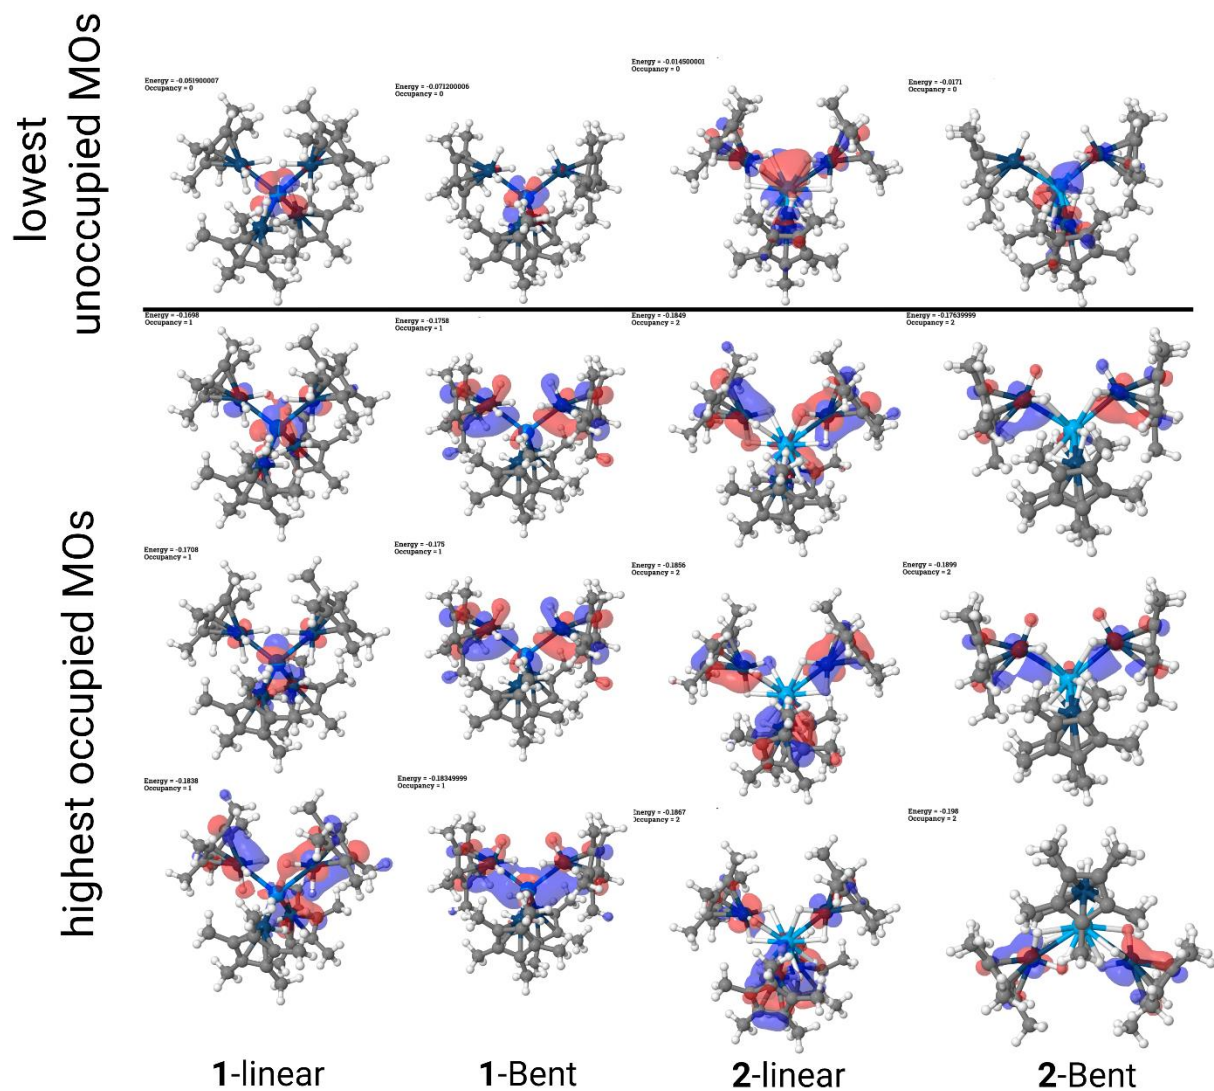

**Table S8.** U/Th and Ir contributions to the calculated HOMOs or SOMOs and LUMO of linear **1** and **2**. For sake of clarity, only the contributions higher than 0.05 are depicted on this table.

|       | SOMO-1   | SOMO     | LUMO     |       | HOMO-1   | HOMO     | LUMO     |
|-------|----------|----------|----------|-------|----------|----------|----------|
| U     |          |          |          | Th    |          |          |          |
| 5S    | -0.02602 | 0.00031  | -0.06169 | 19PX  | -0.00983 | -0.00496 | 0.15726  |
| 7S    | 0.05018  | -0.00046 | 0.11564  | 19PY  | -0.00382 | -0.00502 | 0.28804  |
| 9S    | -0.00398 | 0.00073  | 0.13518  | 19PZ  | -0.00100 | 0.01422  | -0.28669 |
| 10S   | -0.01538 | -0.00084 | -0.27810 | 23D 0 | -0.00499 | 0.00160  | 0.08906  |
| 19PY  | 0.05177  | -0.00307 | -0.02755 | 23D+1 | 0.00062  | 0.00227  | 0.06664  |
| 23D 0 | -0.05017 | -0.00147 | 0.01106  | 23D-2 | -0.00052 | -0.00528 | -0.12398 |
| 25F 0 | -0.00620 | -0.11845 | -0.00308 | 24D 0 | 0.00875  | -0.00337 | 0.17613  |
| 25F+1 | -0.00409 | -0.19062 | -0.01142 | 24D+1 | 0.00986  | -0.00318 | 0.13394  |
| 25F-1 | 0.37190  | -0.00035 | 0.15941  | 24D-1 | 0.00559  | 0.00806  | -0.09313 |
| 25F+2 | -0.01135 | 0.25566  | -0.01178 | 24D+2 | -0.00524 | -0.00033 | -0.07914 |
| 25F-2 | -0.01542 | 0.01256  | 0.30710  | 24D-2 | 0.00027  | 0.00596  | -0.23796 |
| 25F+3 | -0.01408 | 0.21882  | 0.01216  | 25F+1 | -0.00286 | -0.01492 | 0.08928  |
| 25F-3 | 0.19425  | 0.02119  | -0.27323 | 25F-1 | -0.02126 | 0.00715  | -0.05482 |
| 26F 0 | -0.00546 | -0.10353 | -0.00276 | 26F-3 | 0.01752  | -0.00417 | -0.05552 |
| 26F+1 | -0.00360 | -0.16737 | -0.01012 | 27F+1 | -0.00263 | -0.01399 | 0.05568  |
| 26F-1 | 0.32708  | -0.00030 | 0.14089  | Ir    |          |          |          |
| 26F+2 | -0.00999 | 0.22504  | -0.01045 | 6S    | 0.00154  | -0.00052 | 0.59538  |
| 26F-2 | -0.01348 | 0.01104  | 0.27192  | 8PX   | -0.04861 | -0.05338 | 0.00607  |
| 26F+3 | -0.01237 | 0.19243  | 0.01079  | 8PY   | 0.03359  | 0.08735  | 0.00170  |
| 26F-3 | 0.17099  | 0.01863  | -0.24179 | 8PZ   | -0.06883 | 0.02971  | -0.00294 |
| 27F 0 | -0.00363 | -0.06590 | -0.00193 | 10PX  | 0.05108  | 0.02696  | 0.01794  |



|       |          |          |          |       |          |          |          |
|-------|----------|----------|----------|-------|----------|----------|----------|
| 27F+1 | -0.00253 | -0.11126 | -0.00720 | 10PY  | -0.01594 | -0.07198 | 0.06121  |
| 27F-1 | 0.22027  | 0.00004  | 0.10267  | 11PX  | -0.00145 | -0.00189 | 0.33522  |
| 27F+2 | -0.00698 | 0.15682  | -0.00743 | 11PY  | 0.00258  | 0.00350  | 0.18722  |
| 27F-2 | -0.00511 | 0.00790  | 0.19470  | 12D 0 | 0.10653  | -0.07212 | 0.01635  |
| 27F+3 | -0.00870 | 0.12850  | 0.00777  | 12D+1 | -0.01370 | -0.21113 | -0.09641 |
| 27F-3 | 0.11864  | 0.01267  | -0.17544 | 12D-1 | 0.21270  | 0.18646  | -0.05732 |
| 28F-1 | 0.09777  | 0.00052  | 0.07186  | 12D+2 | 0.04713  | 0.01644  | -0.10350 |
| 28F+2 | -0.00386 | 0.08049  | -0.00481 | 12D-2 | 0.10851  | -0.07579 | 0.06526  |
| 28F-2 | 0.01414  | 0.00378  | 0.11663  | 13D+1 | 0.00264  | -0.08584 | -0.04919 |
| 4S    | 0.02235  | -0.00220 | 0.06251  | 13D-1 | 0.08722  | 0.06883  | -0.03020 |
| Ir    |          |          |          | 13D+2 | 0.02767  | 0.02084  | -0.05952 |
| 12D 0 | 0.09432  | -0.02623 | 0.01985  | 14D-2 | 0.00532  | 0.00673  | 0.09075  |
| 12D+1 | 0.05627  | 0.07598  | 0.00246  | Ir    |          |          |          |
| 12D-1 | 0.03989  | -0.15929 | 0.00590  | 8PX   | -0.06315 | 0.09228  | -0.00405 |
| 12D-2 | 0.08320  | -0.05499 | -0.06417 | 10PX  | 0.05228  | -0.06294 | 0.07285  |
| 13D-1 | 0.01225  | -0.05602 | 0.00742  | 10PZ  | 0.00629  | 0.01551  | -0.05273 |
| 4S    | 0.00497  | 0.01090  | 0.05741  | 11PY  | -0.00142 | -0.00166 | -0.12099 |
| Ir    |          |          |          | 11PZ  | 0.00124  | 0.00112  | 0.12274  |
| 5S    | 0.00325  | 0.01035  | 0.08684  | 12D 0 | 0.00728  | 0.02084  | 0.24999  |
| 10PY  | 0.02145  | -0.07226 | 0.02368  | 12D+1 | 0.05657  | -0.07790 | -0.15368 |
| 12D-1 | -0.12990 | 0.09752  | -0.03900 | 12D+2 | -0.08119 | 0.09543  | 0.11408  |
| 12D+2 | -0.08886 | -0.05755 | 0.03706  | 12D-2 | -0.15621 | 0.24178  | -0.10986 |
| 12D-2 | -0.07879 | -0.03060 | -0.00340 | 13D 0 | 0.00539  | 0.00654  | 0.13244  |
| Ir    |          |          |          | 13D+1 | 0.01277  | -0.01799 | -0.09025 |
| 4S    | 0.02142  | 0.00195  | 0.06105  | 13D-2 | -0.06375 | 0.09726  | -0.06939 |

|       |          |          |          |       |          |          |          |
|-------|----------|----------|----------|-------|----------|----------|----------|
| 5S    | 0.02217  | 0.01126  | 0.08612  | 14D-2 | 0.00217  | -0.00400 | -0.06262 |
| 12D 0 | 0.09478  | 0.04190  | 0.01963  | Ir    |          |          |          |
| 12D+1 | 0.06362  | -0.06135 | 0.00264  | 6S    | -0.00086 | -0.00162 | -0.05074 |
| 12D-1 | -0.02592 | -0.16053 | -0.00846 | 8PX   | 0.00662  | -0.06795 | 0.00171  |
| 12D-2 | -0.07971 | -0.06508 | 0.06156  | 8PY   | -0.02785 | -0.08636 | 0.00105  |
| 13D-1 | -0.00691 | -0.05665 | -0.00815 | 8PZ   | 0.08936  | -0.02908 | 0.00135  |
| Ir    |          |          |          | 10PX  | -0.01708 | 0.05127  | 0.00877  |
| 4S    | 0.00517  | -0.01006 | 0.05418  | 10PY  | 0.02749  | 0.06309  | 0.04448  |
| 5S    | 0.00373  | -0.00912 | 0.08217  | 10PZ  | -0.06388 | 0.01587  | -0.08204 |
| 10PY  | 0.01984  | 0.07086  | 0.02284  | 11PY  | 0.00011  | -0.00431 | -0.14276 |
| 12D-1 | 0.13184  | 0.09599  | 0.03714  | 11PZ  | 0.00543  | -0.00220 | 0.11438  |
| 12D+2 | -0.10008 | 0.06361  | 0.03600  | 12D 0 | 0.16916  | -0.02649 | -0.16340 |
| 12D-2 | 0.06307  | -0.03009 | 0.00448  | 12D+1 | 0.13965  | 0.15425  | 0.19334  |
| 13D-1 | 0.05617  | 0.04311  | 0.01926  | 12D-1 | -0.06388 | 0.27795  | -0.09272 |
|       |          |          |          | 12D+2 | 0.03407  | -0.05453 | -0.16751 |
|       |          |          |          | 12D-2 | -0.15492 | 0.00947  | -0.06573 |
|       |          |          |          | 13D 0 | 0.05605  | -0.00961 | -0.09450 |
|       |          |          |          | 13D+1 | 0.06491  | 0.05702  | 0.10485  |
|       |          |          |          | 13D-1 | -0.03189 | 0.10812  | -0.06500 |
|       |          |          |          | 13D+2 | 0.01073  | -0.03721 | -0.08837 |
|       |          |          |          | 13D-2 | -0.06177 | -0.00154 | -0.03615 |
|       |          |          |          | Ir    |          |          |          |
|       |          |          |          | 5S    | -0.00541 | 0.02821  | -0.22680 |
|       |          |          |          | 6S    | 0.00013  | 0.00630  | -0.51129 |
|       |          |          |          | 8PX   | 0.10954  | 0.03024  | -0.00290 |

|  |  |  |  |       |          |          |          |
|--|--|--|--|-------|----------|----------|----------|
|  |  |  |  | 10PX  | -0.08206 | -0.01430 | 0.03619  |
|  |  |  |  | 10PY  | -0.00106 | -0.02916 | 0.07089  |
|  |  |  |  | 11PX  | 0.00864  | 0.00379  | -0.17972 |
|  |  |  |  | 11PY  | 0.00251  | 0.00011  | 0.13058  |
|  |  |  |  | 11PZ  | -0.00033 | 0.00468  | -0.25371 |
|  |  |  |  | 12D+1 | 0.09108  | 0.02313  | 0.14486  |
|  |  |  |  | 12D-1 | 0.04081  | -0.02557 | 0.10218  |
|  |  |  |  | 12D+2 | -0.18147 | -0.01911 | 0.14035  |
|  |  |  |  | 12D-2 | 0.24588  | 0.09257  | -0.01328 |
|  |  |  |  | 13D+1 | 0.01986  | 0.00497  | 0.08227  |
|  |  |  |  | 13D-1 | 0.01159  | -0.01161 | 0.06082  |
|  |  |  |  | 13D+2 | -0.07271 | -0.01036 | 0.07590  |
|  |  |  |  | 13D-2 | 0.10178  | 0.03606  | -0.00016 |
|  |  |  |  | 14D-1 | 0.00874  | 0.00211  | 0.09859  |

**Table S9.** U/Th, C(Cp) and Ir contributions to the calculated HOMOs or SOMOs and LUMO of bent **1** and **2**. For sake of clarity, only the contributions higher than 0.05 are depicted on this table.

|       | HOMO-1   | HOMO     | LUMO     |       | HOMO-1   | HOMO     | LUMO     |
|-------|----------|----------|----------|-------|----------|----------|----------|
| U     |          |          |          |       | Th       |          |          |
| 4S    | -0.10290 | 0.00008  | -0.00278 | 4S    | -0.09269 | -0.00019 | 0.00304  |
| 5S    | 0.14911  | 0.00017  | 0.00395  | 5S    | 0.13546  | 0.00037  | -0.00348 |
| 6S    | 0.06747  | -0.00109 | 0.00212  | 6S    | 0.06012  | -0.00019 | -0.00560 |
| 7S    | -0.23710 | 0.00282  | -0.00733 | 7S    | -0.21294 | 0.00026  | 0.01693  |
| 8S    | -0.07471 | -0.00494 | -0.00006 | 8S    | -0.07906 | -0.00141 | -0.01678 |
| 9S    | 0.27558  | 0.02178  | -0.00455 | 9S    | 0.22743  | 0.00419  | 0.00555  |
| 10S   | -0.09111 | -0.00484 | -0.00161 | 10S   | -0.13864 | -0.00392 | 0.54834  |
| 16PX  | -0.00206 | 0.12766  | -0.00169 | 15PY  | -0.05667 | -0.00649 | -0.02628 |
| 16PY  | 0.06080  | 0.00992  | 0.00051  | 16PX  | -0.00437 | 0.11495  | 0.00797  |
| 16PZ  | 0.01007  | -0.06685 | 0.00426  | 16PY  | 0.08381  | 0.00963  | 0.04188  |
| 17PX  | -0.00242 | 0.09804  | -0.00254 | 16PZ  | 0.00792  | -0.06146 | 0.03966  |
| 17PY  | 0.05871  | 0.00747  | -0.00070 | 17PX  | -0.00509 | 0.13165  | 0.01050  |
| 17PZ  | 0.00804  | -0.05163 | 0.00269  | 17PY  | 0.10256  | 0.01177  | 0.04126  |
| 23D+1 | -0.08901 | 0.00980  | -0.00875 | 17PZ  | 0.00886  | -0.07046 | 0.05200  |
| 23D-1 | -0.01882 | -0.06493 | 0.03133  | 21D 0 | 0.01662  | 0.00278  | -0.06700 |
| 23D+2 | 0.05360  | -0.01407 | 0.01431  | 22D 0 | -0.01194 | -0.00207 | 0.05625  |
| 23D-2 | 0.00312  | 0.12237  | -0.06631 | 23D 0 | -0.04623 | -0.00740 | 0.17317  |
| 24D+1 | -0.06900 | 0.00624  | -0.00095 | 23D+1 | -0.11405 | 0.01156  | 0.06041  |
| 25F 0 | -0.02987 | -0.03775 | -0.25892 | 23D-1 | -0.00679 | -0.06616 | 0.10138  |

|       |          |          |          |  |       |          |          |          |
|-------|----------|----------|----------|--|-------|----------|----------|----------|
| 25F+1 | 0.09212  | 0.00234  | 0.12996  |  | 23D+2 | 0.05979  | -0.01673 | -0.07795 |
| 25F-1 | -0.11830 | 0.00278  | 0.11279  |  | 23D-2 | 0.01486  | 0.12438  | 0.05977  |
| 25F-2 | -0.20381 | 0.00720  | -0.09002 |  | 24D 0 | -0.02949 | -0.00611 | 0.25477  |
| 25F+3 | -0.09877 | 0.00020  | 0.30061  |  | 24D+1 | -0.08645 | 0.00822  | 0.10602  |
| 25F-3 | 0.05884  | -0.00199 | 0.04204  |  | 24D-1 | -0.00850 | -0.04042 | 0.13017  |
| 26F 0 | -0.02637 | -0.03285 | -0.22942 |  | 24D+2 | 0.04813  | -0.01151 | -0.09367 |
| 26F+1 | 0.08109  | 0.00201  | 0.11529  |  | 24D-2 | 0.01403  | 0.08123  | 0.07359  |
| 26F-1 | -0.10415 | 0.00241  | 0.10017  |  | 25F+1 | 0.00123  | 0.00237  | -0.07201 |
| 26F-2 | -0.17886 | 0.00641  | -0.07978 |  | 25F-1 | -0.00376 | 0.00184  | -0.08484 |
| 26F+3 | -0.08684 | 0.00028  | 0.26656  |  | 25F-3 | -0.03337 | -0.00017 | -0.05989 |
| 26F-3 | 0.05093  | -0.00175 | 0.03716  |  | 26F+1 | 0.00085  | 0.00148  | -0.05585 |
| 27F 0 | -0.01810 | -0.02854 | -0.16495 |  | 27F-1 | -0.00377 | 0.00147  | -0.05119 |
| 27F+1 | 0.05531  | 0.00180  | 0.08266  |  | Ir    |          |          |          |
| 27F-1 | -0.07112 | 0.00146  | 0.07017  |  | 4S    | -0.05001 | -0.00013 | 0.00929  |
| 27F-2 | -0.11788 | 0.00503  | -0.05593 |  | 5S    | 0.03317  | 0.01416  | -0.17048 |
| 27F+3 | -0.05828 | -0.00204 | 0.18924  |  | 6S    | 0.04566  | 0.01044  | -0.32958 |
| 28F 0 | -0.00937 | -0.01485 | -0.08874 |  | 10PX  | -0.00702 | -0.02695 | 0.05457  |
| Ir    |          |          |          |  | 10PY  | -0.00334 | 0.00179  | 0.05774  |
| 4S    | -0.05951 | -0.00582 | -0.00360 |  | 10PZ  | 0.01004  | -0.00283 | 0.04731  |
| 12D+2 | -0.01205 | 0.05872  | -0.05382 |  | 11PX  | -0.01496 | -0.00764 | 0.06425  |
| 12D-2 | 0.00277  | -0.00723 | 0.05686  |  | 11PY  | -0.03708 | -0.00659 | 0.06113  |
| Ir    |          |          |          |  | 11PZ  | -0.03097 | -0.00747 | 0.15469  |

|       |          |          |          |  |       |          |          |          |
|-------|----------|----------|----------|--|-------|----------|----------|----------|
| 2S    | 0.05099  | 0.00206  | -0.00112 |  | 12D 0 | -0.03008 | -0.03785 | 0.08329  |
| 4S    | -0.06711 | 0.00249  | -0.00094 |  | 12D+1 | 0.01429  | 0.01250  | -0.06067 |
| 12D+1 | 0.05890  | -0.00057 | 0.05956  |  | 12D+2 | -0.01890 | 0.06871  | 0.03858  |
| 12D-1 | -0.06723 | -0.00454 | 0.00448  |  | 12D-2 | -0.04015 | -0.00755 | -0.11091 |
| Ir    |          |          |          |  | Ir    |          |          |          |
| 5S    | -0.01259 | 0.07349  | 0.03526  |  | 5S    | 0.02093  | -0.02211 | -0.15621 |
| 8PY   | -0.10017 | -0.13640 | 0.00223  |  | 6S    | 0.04351  | -0.01287 | -0.08325 |
| 10PY  | 0.09661  | 0.15327  | -0.01820 |  | 10PX  | 0.00748  | -0.04210 | -0.05871 |
| 12D 0 | -0.11971 | -0.16604 | 0.01670  |  | 10PY  | -0.00653 | -0.00571 | 0.09313  |
| 12D+1 | -0.14139 | -0.06772 | 0.07594  |  | 10PZ  | -0.03107 | -0.00370 | 0.05147  |
| 12D+2 | -0.05741 | -0.16188 | -0.03442 |  | 11PY  | -0.03464 | 0.00906  | -0.08269 |
| 12D-2 | 0.17823  | 0.20961  | 0.01430  |  | 11PZ  | 0.02568  | -0.00966 | -0.14340 |
| 13D 0 | -0.04521 | -0.06488 | 0.00870  |  | 12D 0 | -0.04055 | 0.02411  | 0.34516  |
| 13D+1 | -0.05219 | -0.01599 | 0.03269  |  | 12D-1 | 0.00407  | 0.00776  | -0.05582 |
| 13D+2 | -0.02231 | -0.06678 | -0.01755 |  | 12D+2 | 0.00095  | -0.06507 | 0.14813  |
| 13D-2 | 0.07236  | 0.09085  | 0.00179  |  | 12D-2 | 0.02639  | 0.02265  | 0.21044  |
| Ir    |          |          |          |  | 13D 0 | -0.02326 | 0.00502  | 0.17714  |
| 5S    | -0.01873 | -0.07483 | -0.01094 |  | 13D-2 | 0.00534  | 0.00667  | 0.12326  |
| 8PY   | -0.09795 | 0.12931  | -0.00483 |  | 14D 0 | -0.00709 | 0.01017  | 0.10295  |
| 10PX  | -0.04067 | 0.06445  | -0.02115 |  | 14D-2 | -0.00875 | 0.01919  | 0.06964  |
| 10PY  | 0.08740  | -0.14631 | 0.02690  |  | Ir    |          |          |          |
| 12D 0 | -0.14299 | 0.14791  | -0.05076 |  | 5S    | -0.00149 | 0.07369  | -0.09849 |

|        |          |          |          |  |       |          |          |          |
|--------|----------|----------|----------|--|-------|----------|----------|----------|
| 12D+1  | -0.16416 | 0.10847  | -0.04850 |  | 8PY   | -0.14117 | -0.13202 | 0.00792  |
| 12D-1  | 0.08492  | -0.08079 | -0.01855 |  | 10PY  | 0.12286  | 0.15101  | -0.01257 |
| 12D+2  | -0.03785 | 0.10192  | 0.04034  |  | 10PZ  | -0.02212 | -0.01091 | 0.07029  |
| 12D-2  | -0.10548 | 0.21735  | 0.01509  |  | 12D 0 | -0.14936 | -0.16355 | -0.12334 |
| 13D 0  | -0.05342 | 0.05444  | -0.02469 |  | 12D+1 | -0.16130 | -0.09526 | 0.03995  |
| 13D+1  | -0.06242 | 0.03655  | -0.02213 |  | 12D-1 | -0.04134 | -0.06675 | -0.03702 |
| 13D-2  | -0.04534 | 0.09796  | 0.00193  |  | 12D+2 | -0.04683 | -0.13625 | -0.01306 |
| C (Cp) |          |          |          |  | 12D-2 | 0.14503  | 0.19964  | 0.00557  |
| 2S     | -0.01573 | 0.01363  | -0.00303 |  | 13D 0 | -0.05506 | -0.06027 | -0.06488 |
| 2PX    | -0.10441 | 0.15155  | 0.00660  |  | 13D+1 | -0.05968 | -0.03002 | 0.02533  |
| 2PZ    | 0.06743  | -0.10337 | -0.00478 |  | 13D+2 | -0.01694 | -0.05485 | -0.00076 |
| 3S     | 0.06537  | -0.07991 | -0.00940 |  | 13D-2 | 0.06293  | 0.08649  | 0.01132  |
| 3PX    | -0.09104 | 0.13271  | 0.00295  |  | Ir    |          |          |          |
| 3PY    | -0.07665 | 0.10211  | -0.00226 |  | 4S    | 0.02747  | -0.02282 | -0.05385 |
| 3PZ    | 0.05881  | -0.08706 | -0.00452 |  | 5S    | -0.00862 | -0.06296 | -0.10531 |
| C (Cp) |          |          |          |  | 6S    | -0.02011 | -0.01423 | 0.05690  |
| 2PX    | 0.09218  | 0.14721  | 0.00943  |  | 8PX   | 0.06024  | -0.05065 | -0.00758 |
| 2PZ    | -0.07709 | -0.11187 | -0.00728 |  | 8PY   | -0.13151 | 0.12553  | 0.00202  |
| 3S     | 0.05660  | 0.07716  | 0.01217  |  | 10PX  | -0.06675 | 0.05063  | 0.08342  |
| 3PX    | 0.08705  | 0.13896  | 0.00622  |  | 10PY  | 0.10944  | -0.14522 | 0.03730  |
| 3PY    | -0.04596 | -0.06782 | 0.00097  |  | 11PX  | 0.02485  | 0.00348  | -0.11660 |
| 3PZ    | -0.07849 | -0.10868 | -0.00672 |  | 11PZ  | -0.01391 | -0.00691 | -0.08252 |

|  |  |  |  |        |          |          |          |
|--|--|--|--|--------|----------|----------|----------|
|  |  |  |  | 12D 0  | -0.13236 | 0.14068  | 0.16520  |
|  |  |  |  | 12D+1  | -0.19409 | 0.13444  | -0.16703 |
|  |  |  |  | 12D-1  | 0.06351  | -0.10701 | 0.00500  |
|  |  |  |  | 12D+2  | -0.00896 | 0.07993  | -0.17182 |
|  |  |  |  | 12D-2  | -0.11988 | 0.20770  | -0.03939 |
|  |  |  |  | 13D 0  | -0.04778 | 0.05021  | 0.09248  |
|  |  |  |  | 13D+1  | -0.07428 | 0.04742  | -0.08405 |
|  |  |  |  | 13D-1  | 0.02914  | -0.05054 | -0.00005 |
|  |  |  |  | 13D+2  | 0.00130  | 0.02938  | -0.09269 |
|  |  |  |  | 13D-2  | -0.05415 | 0.09168  | -0.02538 |
|  |  |  |  | C (Cp) |          |          |          |
|  |  |  |  | 2PX    | -0.14333 | 0.15415  | -0.01730 |
|  |  |  |  | 2PZ    | 0.08987  | -0.09714 | 0.03344  |
|  |  |  |  | 3S     | 0.06825  | -0.08173 | 0.02480  |
|  |  |  |  | 3PX    | -0.11966 | 0.12969  | -0.01549 |
|  |  |  |  | 3PY    | -0.09561 | 0.10938  | -0.02864 |
|  |  |  |  | 3PZ    | 0.07632  | -0.08322 | 0.04630  |
|  |  |  |  | C (Cp) |          |          |          |
|  |  |  |  | 2PX    | 0.14516  | 0.15478  | 0.03554  |
|  |  |  |  | 2PZ    | -0.09103 | -0.09707 | -0.01069 |
|  |  |  |  | 3S     | 0.06612  | 0.07776  | 0.03933  |
|  |  |  |  | 3PX    | 0.13152  | 0.14065  | 0.05352  |



|  |  |  |  |     |          |          |          |
|--|--|--|--|-----|----------|----------|----------|
|  |  |  |  | 3PY | -0.06889 | -0.08091 | -0.02102 |
|  |  |  |  | 3PZ | -0.08535 | -0.09200 | -0.00281 |

**Table S10.** Tabulated calculated bond distances/angles for **3**

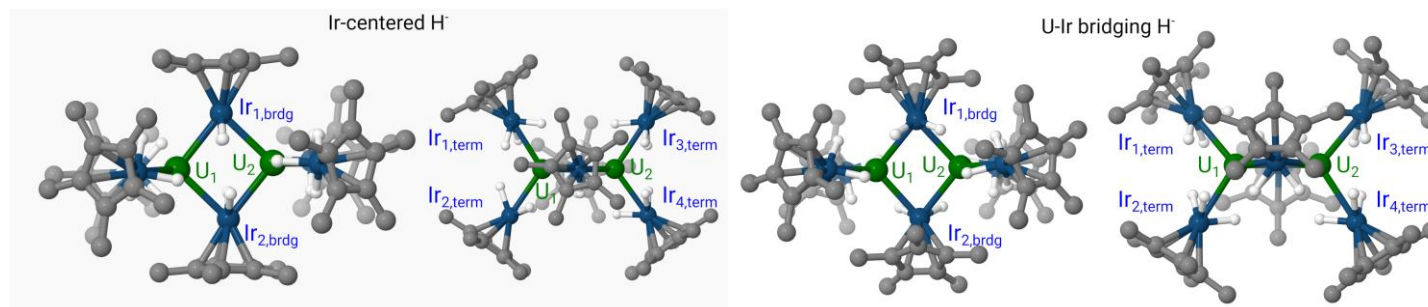

|                                                    | Ir-centered H <sup>-</sup> |                            |                            | Experimental               | U-Ir bridging H <sup>-</sup> |                            |                            |
|----------------------------------------------------|----------------------------|----------------------------|----------------------------|----------------------------|------------------------------|----------------------------|----------------------------|
| Multiplicity                                       | singlet                    | triplet                    | quintet                    | –                          | singlet                      | triplet                    | quintet                    |
| $\Delta_r G$ (kcal/mol)                            | 55.6                       | 7.3                        | 0.0                        | –                          | 78.0                         | 20.7                       | 13.6                       |
| Ir <sub>brdg</sub> –H <sub>brdg</sub> dist. (Å)    | [1.628–1.631]              | [1.627–1.630]              | [1.627–1.631]              | –                          | [1.602–1.608]                | [1.609–1.610]              | [1.608–1.612]              |
| Ir <sub>term</sub> –H <sub>term</sub> dist. (Å)    | [1.624–1.630]              | [1.622–1.628]              | [1.622–1.628]              | –                          | [1.614–1.633]                | [1.609–1.630]              | [1.620–1.630]              |
| U–H <sub>brdg</sub> dist. (Å)                      | [2.440–2.584]              | [2.445–2.613]              | [2.445–2.613]              | –                          | [2.413–2.485]                | [2.379–2.394]              | [2.361–2.394]              |
| U–H <sub>term</sub> dist. (Å)                      | [2.365–2.415]              | [2.373–2.397]              | [2.373–2.394]              | –                          | [2.315–2.439]                | [2.368–2.423]              | [2.373–2.424]              |
| U–Ir <sub>brdg</sub> dist. (Å)                     | 2.810/2.829<br>2.818/2.831 | 2.827/2.830<br>2.837/2.840 | 2.827/2.830<br>2.837/2.840 | 2.814/2.840<br>2.814/2.840 | 2.785/2.813<br>2.797/2.800   | 2.851/2.856<br>2.850/2.856 | 2.851/2.866<br>2.835/2.873 |
| U–Ir <sub>term</sub> dist. (Å)                     | 2.997/3.002<br>2.973/2.976 | 2.978/2.997<br>2.981/2.983 | 2.978/2.997<br>2.981/2.983 | 2.965/2.972<br>2.965/2.972 | 2.964/2.962<br>2.971/2.975   | 3.000/3.003<br>2.996/2.998 | 3.004/3.008<br>2.998/3.001 |
| U–U dist. (Å)                                      | 3.779                      | 3.815                      | 3.815                      | 3.795                      | 2.465                        | 3.703                      | 3.703                      |
| Ir <sub>brdg</sub> –Ir <sub>brdg</sub> dist. (Å)   | 4.192                      | 4.191                      | 4.191                      | 4.192                      | 5.024                        | 4.342                      | 4.343                      |
| Ir <sub>brdg</sub> –U–Ir <sub>brdg</sub> angle (°) | 96.0                       | 95.4                       | 95.4                       | 95.6                       | 127.7                        | 99.1                       | 99.0                       |
| Ir <sub>term</sub> –U–Ir <sub>term</sub> angle (°) | 111.5                      | 111.9                      | 111.9                      | 113.5                      | 101.5                        | 107.4                      | 108.5                      |
| U–Ir <sub>brdg</sub> –U angle (°)                  | 84.0                       | 84.6                       | 84.7                       | 84.3                       | 52.2                         | 80.9                       | 80.8                       |

**Table S11.** Calculated NBO Wiberg Bond Indexes for **3**

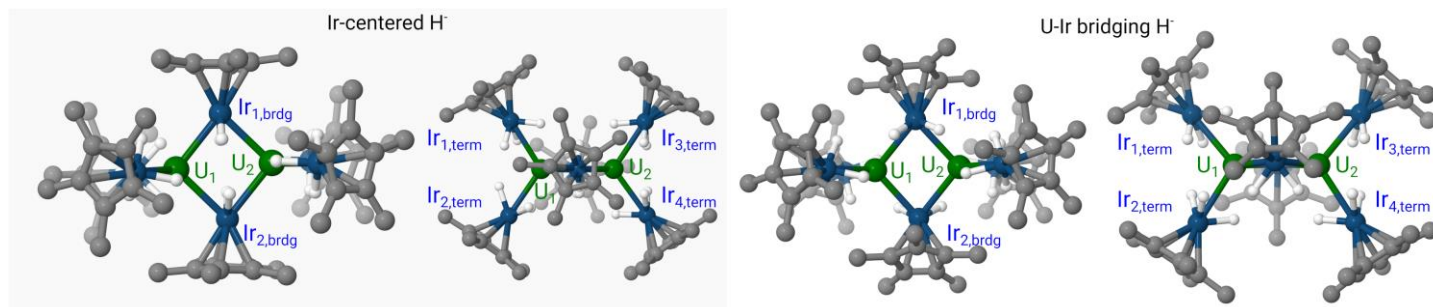

|                                            | Ir-centered H <sup>-</sup>                                      | U-Ir bridging H <sup>-</sup>                                                  |
|--------------------------------------------|-----------------------------------------------------------------|-------------------------------------------------------------------------------|
| Multiplicity                               | quintet                                                         | quintet                                                                       |
| Ir <sub>brdg</sub> -H <sub>brdg</sub>      | 0.47                                                            | 0.54                                                                          |
| Ir <sub>brdg</sub> -C(Cp)                  | [0.18-0.30]                                                     | [0.18-0.30]                                                                   |
| Ir <sub>term</sub> -H <sub>term</sub>      | 0.58                                                            | [0.57-0.59]                                                                   |
| Ir <sub>term</sub> -C(Cp)                  | [0.32-0.35]                                                     | [0.32-0.35]                                                                   |
| U <sub>1</sub> -H <sub>brdg</sub>          | 0.17 (H-Ir <sub>1,brdg</sub> ) / 0.20 (H-Ir <sub>2,brdg</sub> ) | 0.24 / 0.04 (H-Ir <sub>1,brdg</sub> ) / 0.24 / 0.05 (H-Ir <sub>2,brdg</sub> ) |
| U <sub>2</sub> -H <sub>brdg</sub>          | 0.19 (H-Ir <sub>1,brdg</sub> ) / 0.22 (H-Ir <sub>2,brdg</sub> ) | 0.22 / 0.04 (H-Ir <sub>1,brdg</sub> ) / 0.23 / 0.03 (H-Ir <sub>2,brdg</sub> ) |
| U <sub>1</sub> -H <sub>term</sub>          | [0.23-0.25]                                                     | [0.23-0.25]                                                                   |
| U <sub>2</sub> -H <sub>term</sub>          | [0.24-0.26]                                                     | [0.24-0.25]                                                                   |
| U-Ir <sub>1,brdg</sub>                     | 0.85 (U <sub>1</sub> ) / 0.83 (U <sub>2</sub> )                 | 0.88 (U <sub>1</sub> ) / 0.84 (U <sub>2</sub> )                               |
| U-Ir <sub>2,brdg</sub>                     | 0.83 (U <sub>1</sub> ) / 0.85 (U <sub>2</sub> )                 | 0.84 (U <sub>1</sub> ) / 0.89 (U <sub>2</sub> )                               |
| U <sub>1</sub> -Ir <sub>term</sub>         | 0.64 (Ir <sub>1,term</sub> ) / 0.66 (Ir <sub>2,term</sub> )     | 0.X (Ir <sub>1,term</sub> ) / 0.X (Ir <sub>2,term</sub> )                     |
| U <sub>2</sub> -Ir <sub>term</sub>         | 0.65 (Ir <sub>3,term</sub> ) / 0.65 (Ir <sub>4,term</sub> )     | 0.X (Ir <sub>3,term</sub> ) / 0.X (Ir <sub>4,term</sub> )                     |
| U <sub>1</sub> -U <sub>2</sub>             | 0.26                                                            | 0.36                                                                          |
| Ir <sub>1,brdg</sub> -Ir <sub>2,brdg</sub> | 0.03                                                            | 0.03                                                                          |

**Table S12.** Atomic coordinates for the computed structures of **1** at different spin states (singlet (sing), triplet (t) and quintet (q)), with or without dispersion corrections (disp)

**1-linear-sing**

|    |          |          |         |
|----|----------|----------|---------|
| U  | 6.12294  | 5.09344  | 4.16193 |
| Ir | 3.83891  | 3.37355  | 4.84564 |
| Ir | 6.76321  | 6.90294  | 6.39049 |
| C  | 5.99518  | 7.97527  | 8.20707 |
| C  | 7.08518  | 7.12941  | 8.59599 |
| C  | 6.51276  | 8.95164  | 7.26402 |
| C  | 8.27728  | 7.56075  | 7.90602 |
| C  | 5.73906  | 10.09346 | 6.68170 |
| H  | 6.15349  | 10.40480 | 5.71998 |
| H  | 5.75605  | 10.96214 | 7.35337 |
| H  | 4.69412  | 9.82033  | 6.51539 |
| C  | 9.66498  | 7.04306  | 8.12500 |
| H  | 9.65465  | 5.98565  | 8.40096 |
| H  | 10.17368 | 7.59298  | 8.92887 |
| H  | 10.27145 | 7.13794  | 7.22083 |
| C  | 7.91031  | 8.69605  | 7.08792 |
| C  | 4.60752  | 7.95241  | 8.76892 |
| H  | 3.87523  | 8.29293  | 8.03255 |
| H  | 4.52640  | 8.60628  | 9.64795 |
| H  | 4.31829  | 6.94412  | 9.07462 |
| C  | 8.85735  | 9.51244  | 6.26392 |
| H  | 9.65173  | 8.89221  | 5.84195 |
| H  | 9.32756  | 10.29373 | 6.87514 |
| H  | 8.34262  | 9.99995  | 5.43297 |
| C  | 2.11405  | 3.42787  | 7.72124 |
| H  | 3.00654  | 3.28569  | 8.33476 |

|   |          |          |          |
|---|----------|----------|----------|
| H | 1.26598  | 2.97158  | 8.24794  |
| H | 1.92657  | 4.50179  | 7.65150  |
| C | 0.60322  | 4.34791  | 5.05889  |
| H | 0.81088  | 5.15008  | 5.77157  |
| H | -0.41017 | 3.97454  | 5.26116  |
| H | 0.60034  | 4.79274  | 4.06062  |
| C | 3.42367  | 0.15323  | 3.94221  |
| H | 3.53004  | 0.34200  | 2.87135  |
| H | 2.76092  | -0.71354 | 4.06683  |
| H | 4.40896  | -0.12223 | 4.32590  |
| C | 1.45738  | 2.35552  | 2.71000  |
| H | 1.27088  | 3.37823  | 2.37423  |
| H | 0.51103  | 1.80265  | 2.64689  |
| H | 2.15953  | 1.90057  | 2.00745  |
| C | 3.81135  | 0.80218  | 7.04645  |
| H | 4.67982  | 0.32877  | 6.58166  |
| H | 3.17213  | 0.00466  | 7.44920  |
| H | 4.17543  | 1.39496  | 7.88922  |
| C | 1.99052  | 2.33149  | 4.10934  |
| C | 2.87669  | 1.35049  | 4.65633  |
| C | 3.06201  | 1.64912  | 6.06460  |
| C | 2.28171  | 2.81464  | 6.36524  |
| C | 1.61763  | 3.25131  | 5.16316  |
| C | 7.02123  | 6.03399  | 9.61512  |
| H | 6.02559  | 5.58670  | 9.65743  |
| H | 7.25858  | 6.42360  | 10.61348 |
| H | 7.73301  | 5.23686  | 9.38815  |
| H | 5.37372  | 2.89386  | 4.60259  |

|    |         |          |          |
|----|---------|----------|----------|
| H  | 6.70304 | 5.27861  | 6.43091  |
| H  | 3.98804 | 4.32568  | 3.53916  |
| H  | 7.59430 | 6.72699  | 5.00176  |
| H  | 5.42953 | 6.91546  | 5.45487  |
| H  | 4.43101 | 4.60048  | 5.72950  |
| Ir | 8.52049 | 3.50387  | 3.54520  |
| Ir | 5.48888 | 6.74009  | 1.80855  |
| C  | 6.21604 | 7.65662  | -0.10416 |
| C  | 5.11088 | 6.78621  | -0.39899 |
| C  | 5.71974 | 8.71027  | 0.76067  |
| C  | 3.93970 | 7.27796  | 0.27653  |
| C  | 6.51295 | 9.89103  | 1.22804  |
| H  | 6.10100 | 10.31016 | 2.14893  |
| H  | 6.51321 | 10.68432 | 0.46880  |
| H  | 7.55218 | 9.61740  | 1.42632  |
| C  | 2.54658 | 6.74703  | 0.14018  |
| H  | 2.55003 | 5.67114  | -0.05086 |
| H  | 2.01379 | 7.23288  | -0.68891 |
| H  | 1.96717 | 6.91449  | 1.05166  |
| C  | 4.32797 | 8.47659  | 0.99435  |
| C  | 7.58844 | 7.58620  | -0.69889 |
| H  | 8.34181 | 7.96539  | -0.00376 |
| H  | 7.65294 | 8.18067  | -1.62054 |
| H  | 7.86211 | 6.55764  | -0.94632 |
| C  | 3.39819 | 9.36650  | 1.75993  |
| H  | 2.60636 | 8.79005  | 2.24414  |
| H  | 2.92223 | 10.09632 | 1.09189  |
| H  | 3.92665 | 9.91999  | 2.53951  |

|   |          |          |          |
|---|----------|----------|----------|
| C | 10.42575 | 3.35629  | 2.37399  |
| C | 9.59743  | 2.23890  | 2.04091  |
| C | 11.68363 | 4.18125  | 4.52626  |
| H | 11.65503 | 5.20027  | 4.13226  |
| H | 12.71798 | 3.81995  | 4.44475  |
| H | 11.43221 | 4.23591  | 5.58822  |
| C | 8.69518  | 0.12935  | 3.31726  |
| H | 8.30016  | -0.05924 | 4.31852  |
| H | 9.38416  | -0.69020 | 3.07052  |
| H | 7.85521  | 0.07828  | 2.61990  |
| C | 10.21249 | 1.60193  | 5.71480  |
| H | 10.35020 | 2.42205  | 6.42309  |
| H | 11.07175 | 0.92571  | 5.81012  |
| H | 9.31700  | 1.05296  | 6.01498  |
| C | 9.11799  | 1.86698  | 0.67190  |
| H | 8.14694  | 1.36753  | 0.71370  |
| H | 9.82602  | 1.18393  | 0.18426  |
| H | 9.00825  | 2.74704  | 0.03402  |
| C | 10.96279 | 4.37521  | 1.41715  |
| H | 10.29135 | 4.51570  | 0.56709  |
| H | 11.94136 | 4.06521  | 1.02755  |
| H | 11.08753 | 5.34673  | 1.90131  |
| C | 10.09542 | 2.10794  | 4.30989  |
| C | 9.38632  | 1.45553  | 3.24425  |
| C | 10.73748 | 3.28578  | 3.78827  |
| C | 5.15166  | 5.60828  | -1.32313 |
| H | 6.13797  | 5.13882  | -1.32652 |
| H | 4.92164  | 5.91823  | -2.35063 |

|   |         |         |          |
|---|---------|---------|----------|
| H | 4.42437 | 4.84735 | -1.03072 |
| H | 7.04507 | 3.35843 | 2.87551  |
| H | 5.77631 | 5.13934 | 1.84885  |
| H | 7.81535 | 3.70356 | 4.99811  |
| H | 4.62854 | 6.60503 | 3.18132  |
| H | 6.80093 | 6.87084 | 2.76439  |
| H | 8.33456 | 5.11229 | 3.36939  |

**1-linear-t**

|    |          |          |         |
|----|----------|----------|---------|
| U  | 6.15106  | 5.17560  | 4.13648 |
| Ir | 3.87838  | 3.41650  | 4.81095 |
| Ir | 6.81033  | 6.89986  | 6.44483 |
| C  | 6.06813  | 7.90496  | 8.30592 |
| C  | 7.15462  | 7.02591  | 8.65462 |
| C  | 6.60117  | 8.91342  | 7.41207 |
| C  | 8.34244  | 7.46884  | 7.98127 |
| C  | 5.83683  | 10.08491 | 6.87777 |
| H  | 6.26824  | 10.45103 | 5.94335 |
| H  | 5.84331  | 10.91271 | 7.59889 |
| H  | 4.79506  | 9.82153  | 6.67950 |
| C  | 9.72280  | 6.91593  | 8.15565 |
| H  | 9.69510  | 5.85284  | 8.40642 |
| H  | 10.25964 | 7.43635  | 8.96057 |
| H  | 10.31091 | 7.02077  | 7.24063 |
| C  | 7.99210  | 8.64864  | 7.21025 |
| C  | 4.68745  | 7.88169  | 8.88511 |
| H  | 3.95573  | 8.28895  | 8.18268 |
| H  | 4.63160  | 8.47535  | 9.80801 |
| H  | 4.37506  | 6.86223  | 9.12440 |

|   |          |          |         |
|---|----------|----------|---------|
| C | 8.95359  | 9.49426  | 6.43396 |
| H | 9.73463  | 8.88486  | 5.97287 |
| H | 9.44246  | 10.22937 | 7.08702 |
| H | 8.44794  | 10.04051 | 5.63436 |
| C | 1.87024  | 3.75506  | 7.49199 |
| H | 2.67290  | 3.70621  | 8.23151 |
| H | 0.95968  | 3.35482  | 7.95761 |
| H | 1.69461  | 4.80999  | 7.26751 |
| C | 0.60449  | 4.22500  | 4.59760 |
| H | 0.74496  | 5.14430  | 5.17152 |
| H | -0.40322 | 3.84575  | 4.81525 |
| H | 0.63936  | 4.49188  | 3.53868 |
| C | 3.68105  | 0.06865  | 4.34042 |
| H | 3.89306  | 0.11331  | 3.26920 |
| H | 3.02650  | -0.79648 | 4.51513 |
| H | 4.62801  | -0.12173 | 4.85169 |
| C | 1.76990  | 1.98158  | 2.63703 |
| H | 1.48546  | 2.92304  | 2.16178 |
| H | 0.91621  | 1.29542  | 2.56475 |
| H | 2.59327  | 1.55477  | 2.05967 |
| C | 3.79578  | 1.20101  | 7.32469 |
| H | 4.72084  | 0.72455  | 6.99173 |
| H | 3.17146  | 0.43110  | 7.79643 |
| H | 4.05898  | 1.93528  | 8.08927 |
| C | 2.15734  | 2.18678  | 4.06901 |
| C | 3.04622  | 1.33565  | 4.82307 |
| C | 3.07045  | 1.83815  | 6.17983 |
| C | 2.21919  | 2.98615  | 6.25549 |



|    |         |          |          |
|----|---------|----------|----------|
| C  | 1.64687 | 3.20550  | 4.93784  |
| C  | 7.07257 | 5.88845  | 9.62534  |
| H  | 6.08308 | 5.42580  | 9.61225  |
| H  | 7.26681 | 6.24061  | 10.64663 |
| H  | 7.80457 | 5.11158  | 9.39291  |
| H  | 5.42049 | 3.25860  | 5.30276  |
| H  | 6.40990 | 5.32458  | 6.47857  |
| H  | 4.47206 | 3.71565  | 3.32744  |
| H  | 7.77065 | 6.54341  | 5.18102  |
| H  | 5.60437 | 7.11416  | 5.37507  |
| H  | 4.01832 | 5.00967  | 5.11670  |
| Ir | 8.49244 | 3.49428  | 3.50343  |
| Ir | 5.44064 | 6.82293  | 1.78957  |
| C  | 6.16379 | 7.79171  | -0.09872 |
| C  | 5.09125 | 6.88235  | -0.42321 |
| C  | 5.61226 | 8.81191  | 0.76612  |
| C  | 3.89852 | 7.32297  | 0.23849  |
| C  | 6.35595 | 10.00805 | 1.27456  |
| H  | 5.92340 | 10.38039 | 2.20597  |
| H  | 6.32601 | 10.82270 | 0.53934  |
| H  | 7.40448 | 9.77001  | 1.46884  |
| C  | 2.52881 | 6.73727  | 0.08751  |
| H  | 2.57580 | 5.66824  | -0.13304 |
| H  | 1.97853 | 7.22463  | -0.72878 |
| H  | 1.94350 | 6.85782  | 1.00244  |
| C  | 4.22543 | 8.52958  | 0.97862  |
| C  | 7.54223 | 7.78003  | -0.68342 |
| H  | 8.26936 | 8.21807  | 0.00497  |

|   |          |          |          |
|---|----------|----------|----------|
| H | 7.58326  | 8.35104  | -1.62134 |
| H | 7.87242  | 6.76085  | -0.89929 |
| C | 3.24785  | 9.38379  | 1.72492  |
| H | 2.47386  | 8.77725  | 2.20146  |
| H | 2.75030  | 10.09213 | 1.04898  |
| H | 3.74151  | 9.96138  | 2.50998  |
| C | 10.36457 | 3.27015  | 2.29353  |
| C | 9.49290  | 2.17665  | 1.98912  |
| C | 11.70672 | 4.07478  | 4.40188  |
| H | 11.70944 | 5.08929  | 3.99545  |
| H | 12.72431 | 3.67231  | 4.30236  |
| H | 11.48271 | 4.15227  | 5.46866  |
| C | 8.54266  | 0.12277  | 3.31740  |
| H | 8.17474  | -0.04186 | 4.33293  |
| H | 9.18869  | -0.72561 | 3.05352  |
| H | 7.67791  | 0.10374  | 2.64953  |
| C | 10.18102 | 1.56267  | 5.65701  |
| H | 10.32520 | 2.38984  | 6.35582  |
| H | 11.04588 | 0.89248  | 5.74473  |
| H | 9.29433  | 1.01056  | 5.97653  |
| C | 8.98022  | 1.79746  | 0.63433  |
| H | 7.99672  | 1.32561  | 0.70003  |
| H | 9.66015  | 1.08852  | 0.14315  |
| H | 8.88205  | 2.67071  | -0.01481 |
| C | 10.90457 | 4.26352  | 1.31156  |
| H | 10.20829 | 4.42502  | 0.48562  |
| H | 11.85504 | 3.91233  | 0.88924  |
| H | 11.08519 | 5.23159  | 1.78470  |

|   |          |         |          |
|---|----------|---------|----------|
| C | 10.03996 | 2.05575 | 4.24983  |
| C | 9.28647  | 1.41756 | 3.21019  |
| C | 10.70884 | 3.20858 | 3.69800  |
| C | 5.19442  | 5.72363 | -1.36634 |
| H | 6.18710  | 5.26910 | -1.32959 |
| H | 5.01128  | 6.05070 | -2.39805 |
| H | 4.46545  | 4.94628 | -1.12624 |
| H | 6.95476  | 3.26534 | 3.02041  |
| H | 5.96651  | 5.28532 | 1.78875  |
| H | 7.89632  | 3.82225 | 4.98009  |
| H | 4.45795  | 6.39475 | 3.01359  |
| H | 6.56586  | 7.15177 | 2.91519  |
| H | 8.29567  | 5.07142 | 3.15723  |

**1-linear-t-disp**

|    |          |          |         |
|----|----------|----------|---------|
| U  | 6.14093  | 5.23245  | 4.14867 |
| Ir | 3.93040  | 3.45777  | 4.79185 |
| Ir | 6.81276  | 6.91297  | 6.43165 |
| C  | 6.08912  | 7.90140  | 8.28984 |
| C  | 7.15905  | 6.99811  | 8.62494 |
| C  | 6.63905  | 8.90814  | 7.40677 |
| C  | 8.35211  | 7.42564  | 7.95437 |
| C  | 5.88867  | 10.07724 | 6.85669 |
| H  | 6.32161  | 10.41387 | 5.91239 |
| H  | 5.90776  | 10.91864 | 7.56051 |
| H  | 4.84478  | 9.81746  | 6.66735 |
| C  | 9.71247  | 6.82145  | 8.08383 |
| H  | 9.64793  | 5.75328  | 8.30280 |
| H  | 10.28618 | 7.29881  | 8.88901 |

|   |          |          |         |
|---|----------|----------|---------|
| H | 10.27840 | 6.93089  | 7.15583 |
| C | 8.02318  | 8.62030  | 7.19866 |
| C | 4.70254  | 7.87811  | 8.84577 |
| H | 3.98812  | 8.29790  | 8.13353 |
| H | 4.63319  | 8.45776  | 9.77584 |
| H | 4.38408  | 6.85543  | 9.06068 |
| C | 8.99020  | 9.43604  | 6.40397 |
| H | 9.74046  | 8.80010  | 5.92849 |
| H | 9.51322  | 10.15847 | 7.04346 |
| H | 8.48029  | 9.99065  | 5.61337 |
| C | 1.91960  | 3.71487  | 7.44079 |
| H | 2.72563  | 3.67911  | 8.17682 |
| H | 1.01695  | 3.29795  | 7.90564 |
| H | 1.72797  | 4.76627  | 7.21449 |
| C | 0.67571  | 4.19092  | 4.54069 |
| H | 0.79822  | 5.09903  | 5.13545 |
| H | -0.33250 | 3.79854  | 4.72703 |
| H | 0.73785  | 4.47744  | 3.48849 |
| C | 3.90627  | 0.15734  | 4.24987 |
| H | 4.12223  | 0.24991  | 3.18299 |
| H | 3.31339  | -0.75532 | 4.39624 |
| H | 4.86139  | 0.02586  | 4.76367 |
| C | 1.94599  | 2.03170  | 2.55810 |
| H | 1.65450  | 2.98420  | 2.11066 |
| H | 1.11703  | 1.32503  | 2.42931 |
| H | 2.80537  | 1.65360  | 2.00031 |
| C | 3.93698  | 1.23825  | 7.25401 |
| H | 4.87048  | 0.79291  | 6.90337 |

|    |         |          |          |
|----|---------|----------|----------|
| H  | 3.34760 | 0.45248  | 7.74255  |
| H  | 4.19075 | 1.99045  | 8.00376  |
| C  | 2.27770 | 2.19728  | 4.00582  |
| C  | 3.18606 | 1.36420  | 4.75597  |
| C  | 3.17509 | 1.84340  | 6.11990  |
| C  | 2.28402 | 2.95887  | 6.20467  |
| C  | 1.72028 | 3.18007  | 4.88500  |
| C  | 7.04830 | 5.83300  | 9.55412  |
| H  | 6.04946 | 5.39354  | 9.51269  |
| H  | 7.24210 | 6.14396  | 10.58802 |
| H  | 7.76556 | 5.05189  | 9.29366  |
| H  | 5.46299 | 3.33414  | 5.31916  |
| H  | 6.36784 | 5.35034  | 6.46914  |
| H  | 4.52149 | 3.77727  | 3.31205  |
| H  | 7.78338 | 6.54480  | 5.18027  |
| H  | 5.62236 | 7.17920  | 5.35632  |
| H  | 4.01293 | 5.05236  | 5.11416  |
| Ir | 8.42183 | 3.54343  | 3.53031  |
| Ir | 5.43543 | 6.83285  | 1.82039  |
| C  | 6.16028 | 7.77128  | -0.06296 |
| C  | 5.09603 | 6.84999  | -0.37626 |
| C  | 5.59953 | 8.79826  | 0.78587  |
| C  | 3.89963 | 7.29077  | 0.27577  |
| C  | 6.34111 | 9.98570  | 1.30819  |
| H  | 5.90116 | 10.34566 | 2.24059  |
| H  | 6.32076 | 10.80708 | 0.58127  |
| H  | 7.38536 | 9.73666  | 1.50958  |
| C  | 2.54350 | 6.67379  | 0.16193  |

|   |          |          |          |
|---|----------|----------|----------|
| H | 2.61398  | 5.60071  | -0.02941 |
| H | 1.96810  | 7.12725  | -0.65563 |
| H | 1.97631  | 6.80527  | 1.08636  |
| C | 4.21544  | 8.50965  | 0.99835  |
| C | 7.54756  | 7.74347  | -0.61687 |
| H | 8.25968  | 8.18146  | 0.08660  |
| H | 7.61473  | 8.30353  | -1.55909 |
| H | 7.87115  | 6.71820  | -0.81108 |
| C | 3.23739  | 9.34757  | 1.75560  |
| H | 2.48831  | 8.72470  | 2.24987  |
| H | 2.71312  | 10.04215 | 1.08674  |
| H | 3.73758  | 9.93544  | 2.52828  |
| C | 10.26247 | 3.26173  | 2.31355  |
| C | 9.36466  | 2.18259  | 2.04229  |
| C | 11.61323 | 4.10452  | 4.39815  |
| H | 11.61281 | 5.10682  | 3.96344  |
| H | 12.63106 | 3.70074  | 4.31524  |
| H | 11.37881 | 4.21051  | 5.45989  |
| C | 8.34292  | 0.20998  | 3.43337  |
| H | 7.99913  | 0.08814  | 4.46297  |
| H | 8.92957  | -0.67835 | 3.16521  |
| H | 7.45704  | 0.23590  | 2.79460  |
| C | 10.04210 | 1.66050  | 5.72182  |
| H | 10.22459 | 2.51115  | 6.38182  |
| H | 10.87090 | 0.95207  | 5.84174  |
| H | 9.12497  | 1.17225  | 6.05793  |
| C | 8.80359  | 1.80498  | 0.71014  |
| H | 7.81107  | 1.36108  | 0.81593  |

|   |          |         |          |
|---|----------|---------|----------|
| H | 9.44892  | 1.07519 | 0.20454  |
| H | 8.70575  | 2.67724 | 0.06024  |
| C | 10.78793 | 4.23800 | 1.31167  |
| H | 10.06569 | 4.40469 | 0.50984  |
| H | 11.71953 | 3.87153 | 0.86297  |
| H | 10.99299 | 5.20467 | 1.77671  |
| C | 9.92780  | 2.10150 | 4.29843  |
| C | 9.15060  | 1.45756 | 3.28144  |
| C | 10.61897 | 3.22371 | 3.71477  |
| C | 5.21866  | 5.66074 | -1.27271 |
| H | 6.21700  | 5.22304 | -1.20723 |
| H | 5.03798  | 5.94379 | -2.31701 |
| H | 4.49877  | 4.88601 | -1.00083 |
| H | 6.88388  | 3.32217 | 3.04968  |
| H | 5.97302  | 5.29999 | 1.82425  |
| H | 7.85402  | 3.89961 | 5.01107  |
| H | 4.44081  | 6.41392 | 3.03749  |
| H | 6.55503  | 7.19362 | 2.94154  |
| H | 8.25881  | 5.11772 | 3.15287  |

**1-linear-q**

|    |         |         |         |
|----|---------|---------|---------|
| U  | 6.28174 | 4.97359 | 3.74388 |
| Ir | 3.95764 | 3.57522 | 5.15231 |
| Ir | 6.53746 | 6.85307 | 6.29026 |
| C  | 5.56611 | 7.63096 | 8.27438 |
| C  | 6.84951 | 7.03252 | 8.53734 |
| C  | 5.76170 | 8.72535 | 7.36239 |
| C  | 7.84964 | 7.79022 | 7.83381 |
| C  | 4.69399 | 9.66042 | 6.88463 |

|   |         |          |         |
|---|---------|----------|---------|
| H | 4.96364 | 10.12009 | 5.93169 |
| H | 4.53287 | 10.46517 | 7.61309 |
| H | 3.74327 | 9.14148  | 6.74265 |
| C | 9.33191 | 7.61975  | 7.94988 |
| H | 9.59898 | 6.57715  | 8.13487 |
| H | 9.72667 | 8.22191  | 8.77836 |
| H | 9.84210 | 7.93219  | 7.03590 |
| C | 7.16906 | 8.84251  | 7.09844 |
| C | 4.26722 | 7.23355  | 8.89366 |
| H | 3.43156 | 7.37785  | 8.20446 |
| H | 4.06794 | 7.83963  | 9.78808 |
| H | 4.27573 | 6.18589  | 9.20007 |
| C | 7.83183 | 9.93307  | 6.31677 |
| H | 8.76632 | 9.58903  | 5.86781 |
| H | 8.06418 | 10.78708 | 6.96586 |
| H | 7.19020 | 10.28977 | 5.50816 |
| C | 3.00286 | 3.37712  | 8.41160 |
| H | 3.99933 | 3.08928  | 8.75612 |
| H | 2.26814 | 2.89465  | 9.07029 |
| H | 2.89990 | 4.45650  | 8.54172 |
| C | 1.05200 | 4.86132  | 6.35310 |
| H | 1.55228 | 5.53371  | 7.05495 |
| H | 0.08799 | 4.57564  | 6.79659 |
| H | 0.84555 | 5.43435  | 5.44574 |
| C | 2.86394 | 0.58412  | 4.06901 |
| H | 2.76100 | 0.91678  | 3.03326 |
| H | 2.10348 | -0.18834 | 4.25037 |
| H | 3.84562 | 0.11365  | 4.16511 |



|    |         |          |          |
|----|---------|----------|----------|
| C  | 1.01058 | 3.15313  | 3.65122  |
| H  | 0.83214 | 4.22344  | 3.52633  |
| H  | 0.03645 | 2.65634  | 3.74757  |
| H  | 1.48472 | 2.78933  | 2.73686  |
| C  | 4.13961 | 0.75458  | 6.99461  |
| H  | 4.81113 | 0.29518  | 6.26535  |
| H  | 3.52625 | -0.04239 | 7.43576  |
| H  | 4.75871 | 1.17840  | 7.78893  |
| C  | 1.86204 | 2.87852  | 4.85233  |
| C  | 2.71270 | 1.72502  | 5.02519  |
| C  | 3.27680 | 1.79995  | 6.35737  |
| C  | 2.77745 | 2.98152  | 6.98649  |
| C  | 1.89406 | 3.65979  | 6.05530  |
| C  | 7.10791 | 5.91326  | 9.49879  |
| H  | 6.29823 | 5.18027  | 9.48413  |
| H  | 7.19901 | 6.29673  | 10.52287 |
| H  | 8.03228 | 5.38593  | 9.25463  |
| H  | 5.45155 | 3.01211  | 4.86613  |
| H  | 7.05884 | 5.33888  | 6.19223  |
| H  | 3.97661 | 4.35295  | 3.73287  |
| H  | 7.64439 | 6.87089  | 5.16551  |
| H  | 5.70506 | 7.13075  | 4.94008  |
| H  | 4.71822 | 4.92540  | 5.73257  |
| Ir | 8.83036 | 3.36674  | 3.39933  |
| Ir | 5.50686 | 6.63404  | 1.32853  |
| C  | 6.09130 | 7.35187  | -0.71819 |
| C  | 4.85525 | 6.61188  | -0.81379 |
| C  | 5.83816 | 8.49502  | 0.12899  |

|   |          |          |          |
|---|----------|----------|----------|
| C | 3.85334  | 7.28393  | -0.03984 |
| C | 6.82289  | 9.58348  | 0.42762  |
| H | 6.60389  | 10.06909 | 1.38156  |
| H | 6.80020  | 10.35311 | -0.35516 |
| H | 7.84147  | 9.19185  | 0.48269  |
| C | 2.40150  | 6.92491  | 0.03711  |
| H | 2.25282  | 5.84819  | -0.07480 |
| H | 1.82539  | 7.42761  | -0.75200 |
| H | 1.97143  | 7.21495  | 0.99916  |
| C | 4.46886  | 8.46058  | 0.54943  |
| C | 7.34885  | 7.07976  | -1.48454 |
| H | 8.22974  | 7.42791  | -0.93894 |
| H | 7.34059  | 7.58296  | -2.46173 |
| H | 7.48140  | 6.00966  | -1.66286 |
| C | 3.75387  | 9.51617  | 1.33526  |
| H | 2.96148  | 9.08362  | 1.95135  |
| H | 3.29261  | 10.25988 | 0.67095  |
| H | 4.43771  | 10.04524 | 2.00368  |
| C | 11.00758 | 3.38324  | 2.88431  |
| C | 10.32009 | 2.55949  | 1.92794  |
| C | 11.52407 | 3.26097  | 5.45145  |
| H | 11.69110 | 4.34122  | 5.44618  |
| H | 12.50080 | 2.77344  | 5.57968  |
| H | 10.91926 | 3.02783  | 6.33183  |
| C | 9.00115  | 0.30003  | 2.03952  |
| H | 8.30484  | -0.15697 | 2.74664  |
| H | 9.70512  | -0.47571 | 1.70983  |
| H | 8.42264  | 0.61808  | 1.16877  |

|                       |          |          |          |
|-----------------------|----------|----------|----------|
| C                     | 9.73900  | 0.63081  | 5.13711  |
| H                     | 9.57630  | 1.14270  | 6.08892  |
| H                     | 10.56211 | -0.08299 | 5.27650  |
| H                     | 8.83519  | 0.05924  | 4.91319  |
| C                     | 10.34010 | 2.71869  | 0.43917  |
| H                     | 9.42554  | 2.32769  | -0.01390 |
| H                     | 11.18953 | 2.18403  | -0.00858 |
| H                     | 10.41926 | 3.77028  | 0.15258  |
| C                     | 11.82854 | 4.59274  | 2.55616  |
| H                     | 11.42948 | 5.11811  | 1.68538  |
| H                     | 12.86494 | 4.30751  | 2.33297  |
| H                     | 11.84681 | 5.29962  | 3.38909  |
| C                     | 10.05560 | 1.60302  | 4.04263  |
| C                     | 9.72999  | 1.45327  | 2.65793  |
| C                     | 10.84961 | 2.80789  | 4.19362  |
| C                     | 4.63891  | 5.39702  | -1.66285 |
| H                     | 5.54606  | 4.79151  | -1.72704 |
| H                     | 4.35299  | 5.68451  | -2.68314 |
| H                     | 3.84678  | 4.76248  | -1.25855 |
| H                     | 7.43012  | 3.22333  | 2.58029  |
| H                     | 5.83197  | 5.04072  | 1.38491  |
| H                     | 7.93235  | 3.49165  | 4.74818  |
| H                     | 4.65685  | 6.43452  | 2.69809  |
| H                     | 6.82051  | 6.81809  | 2.26890  |
| H                     | 8.64723  | 4.97520  | 3.24649  |
| <b>1-1 lig bend-t</b> |          |          |          |
| U                     | 9.16623  | 9.90284  | 4.34232  |
| Ir                    | 10.19459 | 11.57660 | 6.55813  |

|    |          |          |          |
|----|----------|----------|----------|
| Ir | 7.86605  | 11.59039 | 2.28216  |
| Ir | 7.20512  | 7.95910  | 5.33451  |
| Ir | 11.36599 | 8.42778  | 3.11116  |
| C  | 7.24287  | 11.84975 | 0.13784  |
| C  | 11.69979 | 13.08361 | 7.28904  |
| C  | 9.61605  | 12.83814 | 8.31688  |
| C  | 10.38890 | 13.64657 | 7.39915  |
| C  | 11.75579 | 11.91311 | 8.14684  |
| C  | 8.03666  | 12.97856 | 0.51446  |
| C  | 10.47525 | 11.77426 | 8.77560  |
| C  | 7.35708  | 13.66725 | 1.59536  |
| C  | 6.14216  | 12.95158 | 1.86510  |
| C  | 9.91854  | 14.91474 | 6.75688  |
| H  | 10.43090 | 15.09830 | 5.80972  |
| H  | 10.10809 | 15.77295 | 7.41466  |
| H  | 8.84609  | 14.88163 | 6.55155  |
| C  | 6.21666  | 7.02736  | 7.11909  |
| C  | 13.54250 | 7.98099  | 2.68105  |
| C  | 12.97834 | 11.10062 | 8.44199  |
| H  | 12.71968 | 10.07754 | 8.72522  |
| H  | 13.55245 | 11.54237 | 9.26763  |
| H  | 13.63954 | 11.04220 | 7.57426  |
| C  | 12.58496 | 11.64065 | 2.57672  |
| H  | 11.73035 | 12.01855 | 2.01050  |
| H  | 13.48426 | 12.15586 | 2.20915  |
| H  | 12.43548 | 11.92843 | 3.62116  |
| C  | 9.27395  | 13.46687 | -0.17275 |
| H  | 9.97087  | 13.92343 | 0.53456  |

|   |          |          |          |
|---|----------|----------|----------|
| H | 9.02210  | 14.22447 | -0.92661 |
| H | 9.79914  | 12.65609 | -0.68217 |
| C | 10.11260 | 10.74943 | 9.80548  |
| H | 9.04967  | 10.50160 | 9.76290  |
| H | 10.33111 | 11.12468 | 10.81355 |
| H | 10.67427 | 9.82363  | 9.66231  |
| C | 7.77308  | 14.97614 | 2.19124  |
| H | 7.37098  | 15.10293 | 3.19916  |
| H | 7.41628  | 15.81759 | 1.58167  |
| H | 8.86102  | 15.05379 | 2.26027  |
| C | 12.72105 | 10.15700 | 2.42279  |
| C | 8.24266  | 13.14941 | 8.82621  |
| H | 7.63625  | 13.64169 | 8.06184  |
| H | 8.28409  | 13.81429 | 9.69984  |
| H | 7.71437  | 12.24057 | 9.12437  |
| C | 6.41737  | 7.33188  | 8.57105  |
| H | 7.45645  | 7.17518  | 8.87121  |
| H | 5.78715  | 6.69048  | 9.20249  |
| H | 6.16499  | 8.37098  | 8.79714  |
| C | 4.89992  | 10.88963 | 0.82368  |
| H | 5.22551  | 9.89830  | 0.49910  |
| H | 4.18329  | 11.26683 | 0.08128  |
| H | 4.36562  | 10.76332 | 1.76825  |
| C | 12.82000 | 8.03990  | 1.42894  |
| C | 6.30168  | 5.93068  | 5.05628  |
| C | 11.56001 | 9.90898  | 0.10294  |
| H | 11.08949 | 9.10161  | -0.46303 |
| H | 12.23554 | 10.44648 | -0.57556 |

|   |          |          |          |
|---|----------|----------|----------|
| H | 10.76996 | 10.59419 | 0.42192  |
| C | 12.30923 | 9.37645  | 1.28490  |
| C | 6.88958  | 5.99670  | 6.36061  |
| C | 5.19834  | 7.59023  | 6.26352  |
| C | 12.85594 | 13.67367 | 6.54225  |
| H | 13.54304 | 12.89960 | 6.19146  |
| H | 13.42741 | 14.35686 | 7.18459  |
| H | 12.52132 | 14.23918 | 5.66919  |
| C | 4.20230  | 8.63082  | 6.67286  |
| H | 4.63472  | 9.33910  | 7.38347  |
| H | 3.33291  | 8.16199  | 7.15157  |
| H | 3.84410  | 9.20113  | 5.81289  |
| C | 5.09049  | 13.35746 | 2.85110  |
| H | 4.55586  | 12.48894 | 3.24221  |
| H | 4.35596  | 14.02083 | 2.37675  |
| H | 5.52506  | 13.88899 | 3.70070  |
| C | 14.13719 | 9.69569  | 4.56160  |
| H | 13.52204 | 10.41263 | 5.11145  |
| H | 15.10626 | 10.16617 | 4.34870  |
| H | 14.31632 | 8.84131  | 5.21841  |
| C | 6.06200  | 11.82110 | 0.97551  |
| C | 7.51823  | 10.91316 | -0.99758 |
| H | 8.58806  | 10.83603 | -1.20306 |
| H | 7.02343  | 11.26148 | -1.91356 |
| H | 7.15109  | 9.90722  | -0.78102 |
| C | 13.46295 | 9.27718  | 3.29211  |
| C | 4.29451  | 7.11942  | 3.85470  |
| H | 3.90171  | 8.13871  | 3.83247  |

|   |          |          |          |
|---|----------|----------|----------|
| H | 3.44133  | 6.43219  | 3.93282  |
| H | 4.78381  | 6.93596  | 2.89511  |
| C | 5.24479  | 6.92577  | 4.99527  |
| C | 12.74963 | 6.94840  | 0.40502  |
| H | 12.76189 | 5.96175  | 0.87481  |
| H | 13.60108 | 6.99907  | -0.28699 |
| H | 11.83391 | 7.01481  | -0.18761 |
| C | 6.62276  | 4.93330  | 3.98689  |
| H | 6.47263  | 5.35623  | 2.99066  |
| H | 5.98137  | 4.04624  | 4.07548  |
| H | 7.66223  | 4.60335  | 4.04769  |
| C | 7.96470  | 5.09536  | 6.88473  |
| H | 8.63345  | 4.76602  | 6.08652  |
| H | 7.52511  | 4.20338  | 7.34939  |
| H | 8.57384  | 5.60027  | 7.63804  |
| C | 14.34018 | 6.81466  | 3.17919  |
| H | 14.40689 | 6.81301  | 4.26990  |
| H | 15.36357 | 6.83809  | 2.78129  |
| H | 13.88837 | 5.86591  | 2.87908  |
| H | 8.79494  | 8.01301  | 5.67555  |
| H | 10.89370 | 6.93801  | 3.36047  |
| H | 10.98541 | 8.37852  | 4.68301  |
| H | 9.83235  | 8.40652  | 2.59651  |
| H | 7.15891  | 9.57684  | 5.52311  |
| H | 7.60362  | 8.24175  | 3.78112  |
| H | 11.08292 | 10.84399 | 5.40482  |
| H | 9.16280  | 12.02004 | 5.38548  |
| H | 9.37170  | 10.18297 | 6.68061  |

|   |         |          |         |
|---|---------|----------|---------|
| H | 7.35481 | 11.26630 | 3.78852 |
| H | 9.36480 | 11.78926 | 2.88791 |
| H | 8.22963 | 10.00846 | 2.16380 |

**1-1 lig bend-t-disp**

|    |          |          |         |
|----|----------|----------|---------|
| U  | 9.16876  | 9.87182  | 4.38071 |
| Ir | 10.31005 | 11.52012 | 6.50601 |
| Ir | 7.89765  | 11.45533 | 2.28194 |
| Ir | 7.16556  | 8.04391  | 5.38165 |
| Ir | 11.27614 | 8.37908  | 3.17819 |
| C  | 7.51585  | 11.75795 | 0.09627 |
| C  | 11.90277 | 12.95663 | 7.13671 |
| C  | 9.83050  | 12.86728 | 8.21148 |
| C  | 10.61110 | 13.59113 | 7.25490 |
| C  | 11.90924 | 11.83237 | 8.04179 |
| C  | 8.06597  | 12.96108 | 0.63657 |
| C  | 10.64002 | 11.76601 | 8.69805 |
| C  | 7.16450  | 13.46175 | 1.65098 |
| C  | 6.05097  | 12.55043 | 1.71945 |
| C  | 10.18542 | 14.82732 | 6.53102 |
| H  | 10.64306 | 14.87854 | 5.54069 |
| H  | 10.47947 | 15.72467 | 7.08912 |
| H  | 9.10228  | 14.84995 | 6.39526 |
| C  | 6.19906  | 7.10330  | 7.15589 |
| C  | 13.47108 | 8.15102  | 2.71793 |
| C  | 13.07269 | 10.93296 | 8.30568 |
| H  | 12.74437 | 9.91616  | 8.53131 |
| H  | 13.65469 | 11.30132 | 9.15937 |
| H  | 13.73966 | 10.88282 | 7.44344 |



|   |          |          |          |
|---|----------|----------|----------|
| C | 12.22009 | 11.70851 | 2.87600  |
| H | 11.34620 | 12.06473 | 2.32580  |
| H | 13.08683 | 12.30636 | 2.56191  |
| H | 12.03700 | 11.90266 | 3.93607  |
| C | 9.32451  | 13.63687 | 0.19825  |
| H | 9.82633  | 14.11408 | 1.04344  |
| H | 9.11074  | 14.41075 | -0.54905 |
| H | 10.02437 | 12.92514 | -0.24353 |
| C | 10.24458 | 10.80303 | 9.76968  |
| H | 9.17642  | 10.57965 | 9.72152  |
| H | 10.46095 | 11.21107 | 10.76536 |
| H | 10.78267 | 9.85812  | 9.66790  |
| C | 7.30236  | 14.75315 | 2.38918  |
| H | 6.80486  | 14.70620 | 3.36064  |
| H | 6.86169  | 15.58529 | 1.82435  |
| H | 8.35311  | 14.99054 | 2.57168  |
| C | 12.46375 | 10.25703 | 2.61853  |
| C | 8.46422  | 13.22266 | 8.70108  |
| H | 7.90615  | 13.77961 | 7.94526  |
| H | 8.51876  | 13.84100 | 9.60624  |
| H | 7.88870  | 12.32522 | 8.93953  |
| C | 6.51434  | 7.33438  | 8.59747  |
| H | 7.55990  | 7.10150  | 8.81194  |
| H | 5.88897  | 6.70832  | 9.24751  |
| H | 6.34839  | 8.37790  | 8.87507  |
| C | 5.31970  | 10.37893 | 0.45637  |
| H | 5.86526  | 9.48651  | 0.14131  |
| H | 4.63297  | 10.65890 | -0.35314 |

|   |          |          |          |
|---|----------|----------|----------|
| H | 4.72147  | 10.10551 | 1.32817  |
| C | 12.73166 | 8.23473  | 1.47753  |
| C | 6.11841  | 6.11595  | 5.04299  |
| C | 11.27176 | 10.07148 | 0.32020  |
| H | 10.86344 | 9.26702  | -0.29484 |
| H | 11.86671 | 10.72762 | -0.32817 |
| H | 10.42764 | 10.64056 | 0.72086  |
| C | 12.10597 | 9.52678  | 1.43255  |
| C | 6.76596  | 6.06801  | 6.31603  |
| C | 5.19478  | 7.77927  | 6.37980  |
| C | 13.06188 | 13.46427 | 6.34253  |
| H | 13.70508 | 12.64716 | 6.00796  |
| H | 13.67743 | 14.15571 | 6.93259  |
| H | 12.72296 | 13.99740 | 5.45107  |
| C | 4.32252  | 8.88949  | 6.86930  |
| H | 4.83961  | 9.49572  | 7.61606  |
| H | 3.41085  | 8.48814  | 7.32840  |
| H | 4.02832  | 9.54965  | 6.05071  |
| C | 4.85322  | 12.70622 | 2.59949  |
| H | 4.42109  | 11.73501 | 2.84916  |
| H | 4.08264  | 13.30420 | 2.09790  |
| H | 5.11441  | 13.20447 | 3.53548  |
| C | 13.89308 | 9.77158  | 4.72655  |
| H | 13.19542 | 10.39667 | 5.28917  |
| H | 14.82327 | 10.33419 | 4.57483  |
| H | 14.12045 | 8.89369  | 5.33501  |
| C | 6.26182  | 11.49352 | 0.77550  |
| C | 8.05326  | 10.95817 | -1.04511 |

|   |          |          |          |
|---|----------|----------|----------|
| H | 9.10895  | 11.17089 | -1.22064 |
| H | 7.50661  | 11.19081 | -1.96755 |
| H | 7.95752  | 9.88632  | -0.85688 |
| C | 13.28586 | 9.38578  | 3.41894  |
| C | 4.17490  | 7.52150  | 3.98369  |
| H | 3.86894  | 8.56875  | 4.03852  |
| H | 3.27093  | 6.90174  | 4.04666  |
| H | 4.62413  | 7.36274  | 3.00067  |
| C | 5.13870  | 7.18525  | 5.07442  |
| C | 12.72753 | 7.21218  | 0.38754  |
| H | 12.83008 | 6.20335  | 0.79411  |
| H | 13.55425 | 7.37801  | -0.31541 |
| H | 11.79321 | 7.24335  | -0.17765 |
| C | 6.35908  | 5.19143  | 3.89442  |
| H | 6.19330  | 5.69918  | 2.94181  |
| H | 5.68508  | 4.32680  | 3.94118  |
| H | 7.38695  | 4.82318  | 3.89494  |
| C | 7.80719  | 5.08309  | 6.73735  |
| H | 8.39507  | 4.74145  | 5.88323  |
| H | 7.34401  | 4.20656  | 7.20729  |
| H | 8.49908  | 5.52710  | 7.45627  |
| C | 14.35505 | 7.02106  | 3.13756  |
| H | 14.42629 | 6.95921  | 4.22594  |
| H | 15.37044 | 7.14602  | 2.73970  |
| H | 13.96979 | 6.06374  | 2.77902  |
| H | 8.73810  | 8.07882  | 5.80059  |
| H | 10.91060 | 6.84676  | 3.34667  |
| H | 10.86955 | 8.21391  | 4.73856  |

|   |          |          |         |
|---|----------|----------|---------|
| H | 9.74287  | 8.27030  | 2.67976 |
| H | 7.13719  | 9.66809  | 5.49800 |
| H | 7.62569  | 8.22858  | 3.83274 |
| H | 11.04392 | 10.26539 | 5.78020 |
| H | 9.79476  | 12.02664 | 5.05311 |
| H | 8.99322  | 10.57634 | 6.61238 |
| H | 7.34932  | 11.17948 | 3.78205 |
| H | 9.35389  | 11.73528 | 2.93862 |
| H | 8.30626  | 9.88297  | 2.20428 |

1-2 lig bend-t

|    |          |          |         |
|----|----------|----------|---------|
| U  | 9.15979  | 10.07401 | 4.36246 |
| Ir | 10.15811 | 11.75107 | 6.60495 |
| Ir | 7.94524  | 11.77588 | 2.24848 |
| Ir | 7.16847  | 8.17936  | 5.29680 |
| Ir | 11.33288 | 8.53319  | 3.21333 |
| C  | 7.40565  | 12.04704 | 0.08047 |
| C  | 11.66306 | 13.29214 | 7.23552 |
| C  | 9.66221  | 13.00425 | 8.40751 |
| C  | 10.34927 | 13.82460 | 7.43525 |
| C  | 11.80466 | 12.12718 | 8.09112 |
| C  | 8.23677  | 13.14151 | 0.48186 |
| C  | 10.57676 | 11.96240 | 8.80865 |
| C  | 7.54297  | 13.86470 | 1.53228 |
| C  | 6.29158  | 13.20553 | 1.75997 |
| C  | 9.80935  | 15.07849 | 6.82000 |
| H  | 10.24906 | 15.26097 | 5.83695 |
| H  | 10.03163 | 15.94536 | 7.45563 |
| H  | 8.72549  | 15.02576 | 6.69357 |

|   |          |          |          |
|---|----------|----------|----------|
| C | 5.99665  | 7.12965  | 6.91760  |
| C | 13.47254 | 7.94914  | 2.71497  |
| C | 13.06069 | 11.34041 | 8.30309  |
| H | 12.84214 | 10.31192 | 8.59998  |
| H | 13.67777 | 11.79347 | 9.09063  |
| H | 13.66470 | 11.29621 | 7.39392  |
| C | 12.64013 | 11.62520 | 2.36599  |
| H | 11.70585 | 11.98614 | 1.92876  |
| H | 13.47284 | 12.08471 | 1.81414  |
| H | 12.68031 | 11.99315 | 3.39404  |
| C | 9.51236  | 13.58117 | -0.16693 |
| H | 10.20993 | 13.99948 | 0.56313  |
| H | 9.31584  | 14.35573 | -0.92012 |
| H | 10.01519 | 12.75288 | -0.67054 |
| C | 10.32664 | 10.94610 | 9.87918  |
| H | 9.26462  | 10.70809 | 9.96754  |
| H | 10.66463 | 11.32662 | 10.85167 |
| H | 10.86015 | 10.01418 | 9.67933  |
| C | 7.99575  | 15.15348 | 2.14511  |
| H | 7.56616  | 15.29663 | 3.13937  |
| H | 7.69595  | 16.00908 | 1.52496  |
| H | 9.08318  | 15.18389 | 2.24945  |
| C | 12.72486 | 10.13086 | 2.31900  |
| C | 8.32982  | 13.29823 | 9.02456  |
| H | 7.65837  | 13.78350 | 8.31194  |
| H | 8.43309  | 13.96494 | 9.89151  |
| H | 7.83786  | 12.38478 | 9.36816  |
| C | 6.35968  | 5.86373  | 7.63192  |

|   |          |          |          |
|---|----------|----------|----------|
| H | 6.46252  | 5.02919  | 6.93374  |
| H | 5.59301  | 5.59024  | 8.36941  |
| H | 7.31067  | 5.96277  | 8.16087  |
| C | 4.99807  | 11.19932 | 0.66359  |
| H | 5.28733  | 10.19191 | 0.35455  |
| H | 4.33917  | 11.61160 | -0.11288 |
| H | 4.41004  | 11.10253 | 1.57898  |
| C | 12.68204 | 7.93565  | 1.50551  |
| C | 4.94447  | 8.62462  | 5.47878  |
| C | 11.44290 | 9.74781  | 0.08391  |
| H | 10.87351 | 8.93017  | -0.36397 |
| H | 12.11672 | 10.14925 | -0.68460 |
| H | 10.73322 | 10.52979 | 0.36565  |
| C | 12.22020 | 9.28048  | 1.27486  |
| C | 5.14903  | 7.23260  | 5.75276  |
| C | 6.28960  | 8.47112  | 7.35866  |
| C | 12.75070 | 13.90562 | 6.40928  |
| H | 13.44568 | 13.14788 | 6.03928  |
| H | 13.33116 | 14.62561 | 7.00138  |
| H | 12.34595 | 14.43460 | 5.54306  |
| C | 7.04828  | 8.83717  | 8.59595  |
| H | 7.77686  | 8.06713  | 8.85979  |
| H | 6.36432  | 8.95908  | 9.44631  |
| H | 7.59342  | 9.77344  | 8.45533  |
| C | 5.21746  | 13.66980 | 2.69453  |
| H | 4.61842  | 12.83333 | 3.06189  |
| H | 4.54041  | 14.36655 | 2.18394  |
| H | 5.63805  | 14.18440 | 3.56154  |

|   |          |          |          |
|---|----------|----------|----------|
| C | 14.24031 | 9.77625  | 4.41343  |
| H | 13.71112 | 10.59433 | 4.90798  |
| H | 15.23353 | 10.14098 | 4.12003  |
| H | 14.37940 | 8.98004  | 5.14832  |
| C | 6.19700  | 12.07128 | 0.87112  |
| C | 7.67873  | 11.09404 | -1.04158 |
| H | 8.74927  | 10.99136 | -1.22995 |
| H | 7.20733  | 11.44846 | -1.96732 |
| H | 7.28361  | 10.09900 | -0.82436 |
| C | 13.47911 | 9.29174  | 3.21902  |
| C | 5.52582  | 10.88287 | 6.67596  |
| H | 6.43115  | 11.29135 | 7.13133  |
| H | 4.67500  | 11.13985 | 7.32332  |
| H | 5.38281  | 11.39641 | 5.72194  |
| C | 5.62963  | 9.40138  | 6.48526  |
| C | 12.51451 | 6.76973  | 0.57961  |
| H | 12.50371 | 5.82484  | 1.12862  |
| H | 13.33408 | 6.72335  | -0.15011 |
| H | 11.57617 | 6.83232  | 0.02315  |
| C | 4.07195  | 9.19401  | 4.40342  |
| H | 4.50322  | 10.11195 | 3.99644  |
| H | 3.07454  | 9.43062  | 4.79661  |
| H | 3.94768  | 8.49214  | 3.57568  |
| C | 4.51393  | 6.08523  | 5.02843  |
| H | 4.33536  | 6.32398  | 3.97722  |
| H | 3.54863  | 5.82246  | 5.48106  |
| H | 5.14846  | 5.19615  | 5.05782  |
| C | 14.24541 | 6.79183  | 3.26985  |

|   |          |          |         |
|---|----------|----------|---------|
| H | 14.36781 | 6.87359  | 4.35255 |
| H | 15.24728 | 6.73934  | 2.82323 |
| H | 13.74132 | 5.84336  | 3.06906 |
| H | 7.78085  | 6.93236  | 4.54053 |
| H | 10.84156 | 7.09990  | 3.66583 |
| H | 11.04722 | 8.69266  | 4.79831 |
| H | 9.79599  | 8.46613  | 2.72304 |
| H | 8.72713  | 8.17576  | 5.72033 |
| H | 7.32311  | 8.70400  | 3.77547 |
| H | 11.03973 | 11.04212 | 5.43695 |
| H | 9.08124  | 12.17350 | 5.46469 |
| H | 9.36251  | 10.33683 | 6.72893 |
| H | 7.32254  | 11.38313 | 3.69658 |
| H | 9.37949  | 12.00348 | 2.98284 |
| H | 8.38550  | 10.21525 | 2.11094 |

**1-2 lig bend-t-disp**

|    |          |          |         |
|----|----------|----------|---------|
| U  | 9.18330  | 9.77537  | 4.34826 |
| Ir | 10.22080 | 11.46101 | 6.50824 |
| Ir | 7.91147  | 11.46281 | 2.31548 |
| Ir | 7.19752  | 8.04354  | 5.38486 |
| Ir | 11.35508 | 8.41526  | 3.15170 |
| C  | 7.45338  | 11.89935 | 0.16484 |
| C  | 11.72861 | 13.01170 | 7.06366 |
| C  | 9.70756  | 12.80612 | 8.21829 |
| C  | 10.41291 | 13.55849 | 7.20969 |
| C  | 11.84548 | 11.90044 | 7.98846 |
| C  | 8.21891  | 12.98323 | 0.70004 |
| C  | 10.60843 | 11.78382 | 8.69456 |



|   |          |          |          |
|---|----------|----------|----------|
| C | 7.45186  | 13.57324 | 1.78088  |
| C | 6.22066  | 12.85420 | 1.88585  |
| C | 9.87241  | 14.74562 | 6.47973  |
| H | 10.32211 | 14.83736 | 5.48891  |
| H | 10.07804 | 15.66855 | 7.03547  |
| H | 8.79168  | 14.66432 | 6.34545  |
| C | 5.78758  | 7.54709  | 7.07221  |
| C | 13.55254 | 8.29436  | 2.63019  |
| C | 13.08082 | 11.10181 | 8.24808  |
| H | 12.83553 | 10.08077 | 8.54829  |
| H | 13.67762 | 11.55761 | 9.04832  |
| H | 13.70973 | 11.04078 | 7.35800  |
| C | 12.10538 | 11.77678 | 2.80032  |
| H | 11.19965 | 12.07309 | 2.26803  |
| H | 12.92734 | 12.42655 | 2.46990  |
| H | 11.92850 | 11.96350 | 3.86353  |
| C | 9.51569  | 13.50685 | 0.17519  |
| H | 10.13087 | 13.91641 | 0.98043  |
| H | 9.34574  | 14.30759 | -0.55554 |
| H | 10.09541 | 12.72271 | -0.31559 |
| C | 10.33065 | 10.82301 | 9.80388  |
| H | 9.26313  | 10.61624 | 9.89473  |
| H | 10.67480 | 11.23562 | 10.76018 |
| H | 10.84151 | 9.87176  | 9.64141  |
| C | 7.84967  | 14.77425 | 2.57571  |
| H | 7.38206  | 14.76406 | 3.56271  |
| H | 7.55382  | 15.70146 | 2.06855  |
| H | 8.93126  | 14.80228 | 2.72637  |

|   |          |          |          |
|---|----------|----------|----------|
| C | 12.43169 | 10.34174 | 2.54053  |
| C | 8.35797  | 13.12565 | 8.77290  |
| H | 7.71006  | 13.56456 | 8.01038  |
| H | 8.42937  | 13.83903 | 9.60406  |
| H | 7.86058  | 12.22813 | 9.14633  |
| C | 5.87369  | 6.37149  | 7.99107  |
| H | 5.84842  | 5.43209  | 7.43414  |
| H | 5.03814  | 6.36424  | 8.70290  |
| H | 6.80328  | 6.38694  | 8.56455  |
| C | 5.07131  | 10.90073 | 0.56355  |
| H | 5.42460  | 9.91782  | 0.24328  |
| H | 4.45812  | 11.31996 | -0.24486 |
| H | 4.42182  | 10.74948 | 1.42804  |
| C | 12.77502 | 8.32407  | 1.41227  |
| C | 5.13250  | 8.94890  | 5.33684  |
| C | 11.20005 | 10.06983 | 0.27005  |
| H | 10.79414 | 9.23631  | -0.30692 |
| H | 11.75891 | 10.71889 | -0.41639 |
| H | 10.35494 | 10.62987 | 0.68051  |
| C | 12.08197 | 9.58223  | 1.37133  |
| C | 5.03382  | 7.61018  | 5.84049  |
| C | 6.33632  | 8.85049  | 7.31119  |
| C | 12.82588 | 13.55750 | 6.21004  |
| H | 13.48265 | 12.76218 | 5.85111  |
| H | 13.44108 | 14.27143 | 6.77218  |
| H | 12.42671 | 14.07522 | 5.33502  |
| C | 7.13268  | 9.27243  | 8.50035  |
| H | 7.67042  | 8.42998  | 8.94022  |

|   |          |          |          |
|---|----------|----------|----------|
| H | 6.48052  | 9.70244  | 9.27148  |
| H | 7.87099  | 10.02219 | 8.20792  |
| C | 5.09780  | 13.18257 | 2.81452  |
| H | 4.52677  | 12.29117 | 3.08062  |
| H | 4.40834  | 13.89489 | 2.34526  |
| H | 5.46705  | 13.63124 | 3.73935  |
| C | 13.94709 | 9.94994  | 4.61215  |
| H | 13.23862 | 10.54591 | 5.19198  |
| H | 14.84531 | 10.55399 | 4.43054  |
| H | 14.23235 | 9.08909  | 5.22031  |
| C | 6.21380  | 11.80432 | 0.89476  |
| C | 7.82064  | 11.04971 | -1.00772 |
| H | 8.89969  | 11.03391 | -1.16863 |
| H | 7.34829  | 11.43431 | -1.91985 |
| H | 7.48955  | 10.01891 | -0.86418 |
| C | 13.32187 | 9.52374  | 3.32562  |
| C | 6.11203  | 11.21571 | 6.22429  |
| H | 7.11898  | 11.49685 | 6.54716  |
| H | 5.38805  | 11.71413 | 6.88336  |
| H | 5.97731  | 11.60910 | 5.21471  |
| C | 5.91983  | 9.73304  | 6.25415  |
| C | 12.79277 | 7.29005  | 0.33338  |
| H | 12.96028 | 6.29280  | 0.74666  |
| H | 13.58839 | 7.49118  | -0.39559 |
| H | 11.84179 | 7.26508  | -0.20339 |
| C | 4.48155  | 9.48033  | 4.10259  |
| H | 5.16663  | 10.14682 | 3.57294  |
| H | 3.56715  | 10.03444 | 4.34983  |

|   |          |          |         |
|---|----------|----------|---------|
| H | 4.21398  | 8.67257  | 3.41842 |
| C | 4.21390  | 6.50337  | 5.26015 |
| H | 4.13450  | 6.59685  | 4.17485 |
| H | 3.19812  | 6.50587  | 5.67577 |
| H | 4.66108  | 5.52964  | 5.47230 |
| C | 14.49929 | 7.21262  | 3.03974 |
| H | 14.59720 | 7.16372  | 4.12662 |
| H | 15.49798 | 7.38400  | 2.61809 |
| H | 14.15327 | 6.23471  | 2.69766 |
| H | 7.64164  | 6.57755  | 4.98667 |
| H | 11.10064 | 6.86861  | 3.36926 |
| H | 11.00688 | 8.25271  | 4.72322 |
| H | 9.83405  | 8.16735  | 2.66977 |
| H | 8.75065  | 7.93048  | 5.82276 |
| H | 7.51332  | 8.13408  | 3.80133 |
| H | 11.09801 | 10.58042 | 5.46661 |
| H | 9.23820  | 11.89753 | 5.29675 |
| H | 9.34406  | 10.10418 | 6.68919 |
| H | 7.24155  | 10.85035 | 3.65326 |
| H | 9.25197  | 11.77737 | 3.16393 |
| H | 8.47923  | 9.95761  | 2.07583 |

**Table S8.** Atomic coordinates for the computed structures of **2** at different spin states (singlet (sing), triplet (t) and quintet (q)), with or without dispersion corrections (disp)

**2-linear-s**

|    |          |          |         |
|----|----------|----------|---------|
| Th | 6.15591  | 5.14189  | 4.12698 |
| Ir | 3.81221  | 3.37323  | 4.84146 |
| Ir | 6.80912  | 6.91070  | 6.48837 |
| C  | 6.06475  | 7.90866  | 8.35422 |
| C  | 7.16173  | 7.04379  | 8.69763 |
| C  | 6.58086  | 8.92218  | 7.45347 |
| C  | 8.34299  | 7.49806  | 8.01639 |
| C  | 5.80182  | 10.08719 | 6.92625 |
| H  | 6.22190  | 10.45775 | 5.98839 |
| H  | 5.80667  | 10.91495 | 7.64757 |
| H  | 4.76076  | 9.81490  | 6.73648 |
| C  | 9.73096  | 6.96443  | 8.19089 |
| H  | 9.71783  | 5.90016  | 8.43809 |
| H  | 10.26029 | 7.48939  | 8.99792 |
| H  | 10.31858 | 7.07959  | 7.27677 |
| C  | 7.97340  | 8.67163  | 7.24588 |
| C  | 4.68805  | 7.87418  | 8.94238 |
| H  | 3.94579  | 8.25833  | 8.23804 |
| H  | 4.62945  | 8.48292  | 9.85518 |
| H  | 4.39237  | 6.85472  | 9.20189 |
| C  | 8.91950  | 9.52529  | 6.45938 |
| H  | 9.70867  | 8.92404  | 6.00162 |
| H  | 9.39808  | 10.27300 | 7.10552 |
| H  | 8.40309  | 10.05673 | 5.65674 |
| C  | 1.75923  | 3.83545  | 7.46176 |
| H  | 2.55045  | 3.81893  | 8.21485 |

|   |          |          |          |
|---|----------|----------|----------|
| H | 0.84003  | 3.45986  | 7.93045  |
| H | 1.59111  | 4.87879  | 7.18420  |
| C | 0.53781  | 4.16864  | 4.52719  |
| H | 0.65056  | 5.10741  | 5.07527  |
| H | -0.47328 | 3.78655  | 4.72406  |
| H | 0.60403  | 4.40304  | 3.46198  |
| C | 3.61392  | 0.00342  | 4.51950  |
| H | 3.82977  | -0.01231 | 3.44838  |
| H | 2.96043  | -0.85184 | 4.74033  |
| H | 4.55920  | -0.15623 | 5.04430  |
| C | 1.74432  | 1.84487  | 2.69216  |
| H | 1.50371  | 2.77002  | 2.16368  |
| H | 0.86896  | 1.18527  | 2.63368  |
| H | 2.56521  | 1.36155  | 2.15748  |
| C | 3.66894  | 1.26567  | 7.45181  |
| H | 4.60647  | 0.78453  | 7.16315  |
| H | 3.03681  | 0.50814  | 7.93347  |
| H | 3.90573  | 2.02848  | 8.19708  |
| C | 2.10524  | 2.10986  | 4.12136  |
| C | 2.97347  | 1.29360  | 4.92829  |
| C | 2.97411  | 1.85722  | 6.26449  |
| C | 2.12357  | 3.00673  | 6.26898  |
| C | 1.57981  | 3.17251  | 4.93256  |
| C | 7.09936  | 5.90678  | 9.67035  |
| H | 6.11217  | 5.43918  | 9.67265  |
| H | 7.30721  | 6.26125  | 10.68813 |
| H | 7.83185  | 5.13349  | 9.42780  |
| H | 5.36376  | 3.14458  | 5.26642  |

|    |         |          |          |
|----|---------|----------|----------|
| H  | 6.49229 | 5.31870  | 6.52647  |
| H  | 4.34009 | 3.71249  | 3.34395  |
| H  | 7.74692 | 6.63833  | 5.18944  |
| H  | 5.54408 | 7.07557  | 5.48209  |
| H  | 3.99198 | 4.94618  | 5.20613  |
| Ir | 8.56750 | 3.44893  | 3.45531  |
| Ir | 5.44087 | 6.85017  | 1.73852  |
| C  | 6.15244 | 7.82712  | -0.15042 |
| C  | 5.06919 | 6.93574  | -0.46993 |
| C  | 5.62364 | 8.84709  | 0.73535  |
| C  | 3.88499 | 7.38042  | 0.21201  |
| C  | 6.38479 | 10.03507 | 1.23693  |
| H  | 5.96596 | 10.41231 | 2.17269  |
| H  | 6.35767 | 10.85091 | 0.50268  |
| H  | 7.43251 | 9.78578  | 1.42149  |
| C  | 2.50611 | 6.81707  | 0.05945  |
| H  | 2.53730 | 5.74791  | -0.16377 |
| H  | 1.96131 | 7.31389  | -0.75505 |
| H  | 1.92309 | 6.94233  | 0.97525  |
| C  | 4.23750 | 8.57490  | 0.95821  |
| C  | 7.52560 | 7.80668  | -0.74732 |
| H  | 8.26607 | 8.21273  | -0.05351 |
| H  | 7.56856 | 8.40259  | -1.66941 |
| H  | 7.83559 | 6.78821  | -0.99385 |
| C  | 3.28021 | 9.42608  | 1.73384  |
| H  | 2.50830 | 8.81901  | 2.21290  |
| H  | 2.77971 | 10.14788 | 1.07495  |
| H  | 3.79174 | 9.98769  | 2.51892  |

|   |          |          |          |
|---|----------|----------|----------|
| C | 10.45796 | 3.25873  | 2.26592  |
| C | 9.59388  | 2.16886  | 1.92458  |
| C | 11.76910 | 4.02355  | 4.40680  |
| H | 11.77881 | 5.04510  | 4.01847  |
| H | 12.78803 | 3.62217  | 4.31689  |
| H | 11.52803 | 4.08262  | 5.47104  |
| C | 8.63321  | 0.08522  | 3.19748  |
| H | 8.24962  | -0.09976 | 4.20359  |
| H | 9.28468  | -0.75652 | 2.92636  |
| H | 7.77921  | 0.07919  | 2.51575  |
| C | 10.24116 | 1.47635  | 5.58777  |
| H | 10.35555 | 2.28976  | 6.30801  |
| H | 11.11918 | 0.82331  | 5.67483  |
| H | 9.36195  | 0.89734  | 5.87927  |
| C | 9.10969  | 1.81194  | 0.55335  |
| H | 8.12663  | 1.33603  | 0.59047  |
| H | 9.80120  | 1.11433  | 0.06183  |
| H | 9.02091  | 2.69665  | -0.08163 |
| C | 11.00660 | 4.27522  | 1.31276  |
| H | 10.32558 | 4.44373  | 0.47567  |
| H | 11.96869 | 3.94036  | 0.90387  |
| H | 11.16796 | 5.23623  | 1.80669  |
| C | 10.11205 | 1.99982  | 4.19043  |
| C | 9.37738  | 1.38256  | 3.12762  |
| C | 10.78213 | 3.17070  | 3.67154  |
| C | 5.14613  | 5.78245  | -1.42225 |
| H | 6.13980  | 5.32878  | -1.41790 |
| H | 4.93154  | 6.11576  | -2.44577 |



|   |         |         |          |
|---|---------|---------|----------|
| H | 4.42513 | 5.00331 | -1.16461 |
| H | 7.02854 | 3.16456 | 3.01460  |
| H | 5.79970 | 5.26677 | 1.72499  |
| H | 8.01861 | 3.80553 | 4.94146  |
| H | 4.51465 | 6.57451 | 3.04523  |
| H | 6.70405 | 7.06535 | 2.73720  |
| H | 8.33844 | 5.00653 | 3.05881  |

**2-linear-s-disp**

|    |          |          |         |
|----|----------|----------|---------|
| Th | 6.14742  | 5.14451  | 4.12253 |
| Ir | 3.83869  | 3.40404  | 4.84131 |
| Ir | 6.80110  | 6.88042  | 6.45179 |
| C  | 6.05982  | 7.87447  | 8.30073 |
| C  | 7.14190  | 6.99277  | 8.64593 |
| C  | 6.59499  | 8.88134  | 7.40588 |
| C  | 8.33149  | 7.43074  | 7.97219 |
| C  | 5.82876  | 10.03612 | 6.84755 |
| H  | 6.25665  | 10.37209 | 5.90071 |
| H  | 5.83623  | 10.88299 | 7.54512 |
| H  | 4.78844  | 9.76095  | 6.66039 |
| C  | 9.70127  | 6.85240  | 8.11761 |
| H  | 9.65286  | 5.78543  | 8.34633 |
| H  | 10.26109 | 7.34674  | 8.92243 |
| H  | 10.27233 | 6.96198  | 7.19281 |
| C  | 7.98334  | 8.61141  | 7.20396 |
| C  | 4.67274  | 7.83637  | 8.85484 |
| H  | 3.95286  | 8.23396  | 8.13546 |
| H  | 4.59239  | 8.42849  | 9.77605 |
| H  | 4.37041  | 6.81199  | 9.08432 |

|   |          |          |         |
|---|----------|----------|---------|
| C | 8.93690  | 9.43193  | 6.39790 |
| H | 9.70273  | 8.80273  | 5.93877 |
| H | 9.44067  | 10.17721 | 7.02630 |
| H | 8.41909  | 9.95978  | 5.59430 |
| C | 1.85670  | 3.90068  | 7.46350 |
| H | 2.67147  | 3.88400  | 8.19050 |
| H | 0.94588  | 3.54782  | 7.96341 |
| H | 1.70013  | 4.94073  | 7.16902 |
| C | 0.60597  | 4.23731  | 4.54193 |
| H | 0.74016  | 5.16863  | 5.09694 |
| H | -0.41460 | 3.87760  | 4.72815 |
| H | 0.69087  | 4.47538  | 3.47918 |
| C | 3.67266  | 0.06917  | 4.50294 |
| H | 3.88252  | 0.07485  | 3.43089 |
| H | 3.04176  | -0.80334 | 4.71849 |
| H | 4.62507  | -0.06831 | 5.02028 |
| C | 1.79061  | 1.91822  | 2.69685 |
| H | 1.57516  | 2.85727  | 2.18290 |
| H | 0.90656  | 1.27393  | 2.61623 |
| H | 2.61430  | 1.43256  | 2.16952 |
| C | 3.74971  | 1.32176  | 7.43466 |
| H | 4.68661  | 0.85565  | 7.12173 |
| H | 3.14018  | 0.55754  | 7.93311 |
| H | 3.99332  | 2.09307  | 8.16829 |
| C | 2.13756  | 2.15750  | 4.13063 |
| C | 3.00884  | 1.33820  | 4.92775 |
| C | 3.02298  | 1.89961  | 6.26409 |
| C | 2.17691  | 3.05058  | 6.27714 |

|    |         |          |          |
|----|---------|----------|----------|
| C  | 1.62205 | 3.21989  | 4.94713  |
| C  | 7.04861 | 5.83507  | 9.58625  |
| H  | 6.05395 | 5.38547  | 9.55597  |
| H  | 7.24667 | 6.15771  | 10.61571 |
| H  | 7.77182 | 5.05876  | 9.32799  |
| H  | 5.39161 | 3.14679  | 5.24164  |
| H  | 6.43928 | 5.29964  | 6.50739  |
| H  | 4.32971 | 3.75552  | 3.33464  |
| H  | 7.76018 | 6.58885  | 5.17406  |
| H  | 5.55306 | 7.08751  | 5.43309  |
| H  | 4.02403 | 4.96796  | 5.23578  |
| Ir | 8.52875 | 3.48231  | 3.45828  |
| Ir | 5.44495 | 6.82550  | 1.76632  |
| C  | 6.17594 | 7.80865  | -0.09162 |
| C  | 5.11571 | 6.89712  | -0.43130 |
| C  | 5.61117 | 8.81568  | 0.78342  |
| C  | 3.91267 | 7.31851  | 0.22716  |
| C  | 6.34792 | 9.99341  | 1.33369  |
| H  | 5.90730 | 10.32842 | 2.27499  |
| H  | 6.32458 | 10.83268 | 0.62741  |
| H  | 7.39323 | 9.74402  | 1.52896  |
| C  | 2.55608 | 6.70988  | 0.08064  |
| H  | 2.62620 | 5.64114  | -0.13385 |
| H  | 1.99229 | 7.18276  | -0.73422 |
| H  | 1.97672 | 6.82150  | 1.00010  |
| C  | 4.22762 | 8.51834  | 0.98041  |
| C  | 7.56727 | 7.79394  | -0.63596 |
| H  | 8.27371 | 8.21480  | 0.08353  |

|   |          |          |          |
|---|----------|----------|----------|
| H | 7.64170  | 8.37645  | -1.56380 |
| H | 7.89230  | 6.77337  | -0.85117 |
| C | 3.24762  | 9.33151  | 1.76183  |
| H | 2.50004  | 8.69267  | 2.23749  |
| H | 2.72270  | 10.04295 | 1.11179  |
| H | 3.74648  | 9.89828  | 2.55080  |
| C | 10.40328 | 3.30446  | 2.27278  |
| C | 9.54306  | 2.21256  | 1.93408  |
| C | 11.68301 | 4.09774  | 4.41920  |
| H | 11.66846 | 5.11582  | 4.02312  |
| H | 12.71234 | 3.72181  | 4.34779  |
| H | 11.41950 | 4.15704  | 5.47775  |
| C | 8.55648  | 0.15269  | 3.21852  |
| H | 8.17685  | -0.01358 | 4.22897  |
| H | 9.18245  | -0.70646 | 2.94481  |
| H | 7.69642  | 0.17228  | 2.54532  |
| C | 10.16823 | 1.54880  | 5.60214  |
| H | 10.26807 | 2.37706  | 6.30687  |
| H | 11.04395 | 0.89789  | 5.71554  |
| H | 9.28158  | 0.97758  | 5.88489  |
| C | 9.03344  | 1.86888  | 0.57248  |
| H | 8.04830  | 1.40022  | 0.62977  |
| H | 9.71060  | 1.17184  | 0.06199  |
| H | 8.93608  | 2.76117  | -0.04987 |
| C | 10.92094 | 4.33838  | 1.32616  |
| H | 10.22682 | 4.49545  | 0.49814  |
| H | 11.88770 | 4.03151  | 0.90841  |
| H | 11.05769 | 5.29743  | 1.83033  |

|   |          |         |          |
|---|----------|---------|----------|
| C | 10.06201 | 2.04937 | 4.19811  |
| C | 9.32892  | 1.42893 | 3.13816  |
| C | 10.72828 | 3.22033 | 3.67715  |
| C | 5.24216  | 5.72894 | -1.35462 |
| H | 6.24428  | 5.29798 | -1.30549 |
| H | 5.05180  | 6.03437 | -2.39077 |
| H | 4.52990  | 4.94293 | -1.09542 |
| H | 6.99427  | 3.17819 | 3.01717  |
| H | 5.87744  | 5.26217 | 1.73156  |
| H | 7.99832  | 3.84027 | 4.95000  |
| H | 4.47669  | 6.50002 | 3.02908  |
| H | 6.65772  | 7.10401 | 2.80928  |
| H | 8.30412  | 5.03555 | 3.04651  |

2-1 lig bend-s

|    |          |          |         |
|----|----------|----------|---------|
| Th | 9.16591  | 9.90364  | 4.34191 |
| Ir | 10.21925 | 11.60494 | 6.60983 |
| Ir | 7.85213  | 11.60943 | 2.20169 |
| Ir | 7.15536  | 7.91768  | 5.36389 |
| Ir | 11.42503 | 8.38059  | 3.12404 |
| C  | 7.22844  | 11.83843 | 0.05322 |
| C  | 11.72437 | 13.11290 | 7.34309 |
| C  | 9.64525  | 12.85334 | 8.38088 |
| C  | 10.41029 | 13.66929 | 7.46684 |
| C  | 11.78643 | 11.93623 | 8.19301 |
| C  | 8.03775  | 12.96661 | 0.41062 |
| C  | 10.51208 | 11.78673 | 8.82791 |
| C  | 7.35500  | 13.67656 | 1.47786 |
| C  | 6.13790  | 12.97936 | 1.76117 |

|   |          |          |          |
|---|----------|----------|----------|
| C | 9.93236  | 14.94040 | 6.83554  |
| H | 10.44000 | 15.13287 | 5.88759  |
| H | 10.12303 | 15.79374 | 7.49912  |
| H | 8.85900  | 14.90556 | 6.63550  |
| C | 6.20209  | 6.94892  | 7.14985  |
| C | 13.61302 | 8.01396  | 2.67717  |
| C | 13.01157 | 11.12043 | 8.46777  |
| H | 12.75537 | 10.09469 | 8.74332  |
| H | 13.59336 | 11.55477 | 9.29178  |
| H | 13.66386 | 11.07088 | 7.59282  |
| C | 12.51595 | 11.63583 | 2.61463  |
| H | 11.62862 | 11.98157 | 2.07777  |
| H | 13.37984 | 12.19563 | 2.22830  |
| H | 12.38441 | 11.90618 | 3.66645  |
| C | 9.26555  | 13.44586 | -0.29960 |
| H | 9.96835  | 13.92055 | 0.38987  |
| H | 9.00625  | 14.18523 | -1.06934 |
| H | 9.79006  | 12.62574 | -0.79460 |
| C | 10.15866 | 10.75631 | 9.85539  |
| H | 9.09891  | 10.49571 | 9.80874  |
| H | 10.36901 | 11.13232 | 10.86499 |
| H | 10.73171 | 9.83741  | 9.71292  |
| C | 7.79031  | 14.98224 | 2.06748  |
| H | 7.39150  | 15.11844 | 3.07533  |
| H | 7.44318  | 15.82354 | 1.45279  |
| H | 8.87924  | 15.04531 | 2.13351  |
| C | 12.71290 | 10.16055 | 2.44245  |
| C | 8.27746  | 13.16018 | 8.90788  |

|   |          |          |          |
|---|----------|----------|----------|
| H | 7.66467  | 13.66479 | 8.15687  |
| H | 8.32899  | 13.81253 | 9.79044  |
| H | 7.74977  | 12.24869 | 9.19905  |
| C | 6.44886  | 7.19729  | 8.60535  |
| H | 7.49003  | 6.99976  | 8.87233  |
| H | 5.81605  | 6.55299  | 9.23121  |
| H | 6.23427  | 8.23469  | 8.87424  |
| C | 4.87814  | 10.90926 | 0.74812  |
| H | 5.18911  | 9.91814  | 0.40902  |
| H | 4.15031  | 11.29842 | 0.02291  |
| H | 4.36084  | 10.77868 | 1.70163  |
| C | 12.87970 | 8.05681  | 1.42987  |
| C | 6.20088  | 5.91619  | 5.05163  |
| C | 11.55214 | 9.89308  | 0.12412  |
| H | 11.10365 | 9.07536  | -0.44492 |
| H | 12.20852 | 10.45456 | -0.55375 |
| H | 10.74318 | 10.55256 | 0.44998  |
| C | 12.32307 | 9.37617  | 1.29911  |
| C | 6.82870  | 5.92981  | 6.33930  |
| C | 5.16958  | 7.55956  | 6.34343  |
| C | 12.87781 | 13.71909 | 6.60477  |
| H | 13.56713 | 12.95335 | 6.24005  |
| H | 13.44868 | 14.39425 | 7.25638  |
| H | 12.54053 | 14.29774 | 5.74128  |
| C | 4.21035  | 8.60825  | 6.81595  |
| H | 4.67860  | 9.27661  | 7.54232  |
| H | 3.33998  | 8.14430  | 7.29762  |
| H | 3.84854  | 9.22097  | 5.98717  |

|   |          |          |          |
|---|----------|----------|----------|
| C | 5.08159  | 13.41109 | 2.73111  |
| H | 4.55266  | 12.55228 | 3.15070  |
| H | 4.34185  | 14.05207 | 2.23426  |
| H | 5.50992  | 13.97447 | 3.56319  |
| C | 14.16635 | 9.73274  | 4.56516  |
| H | 13.53890 | 10.43387 | 5.12156  |
| H | 15.12278 | 10.22633 | 4.34734  |
| H | 14.36999 | 8.88095  | 5.21822  |
| C | 6.05106  | 11.82941 | 0.88610  |
| C | 7.50178  | 10.88027 | -1.06474 |
| H | 8.57185  | 10.78956 | -1.26270 |
| H | 7.01664  | 11.22190 | -1.98813 |
| H | 7.12155  | 9.88205  | -0.83612 |
| C | 13.49419 | 9.30118  | 3.29892  |
| C | 4.18098  | 7.18083  | 3.95247  |
| H | 3.79401  | 8.20213  | 3.98489  |
| H | 3.32607  | 6.49566  | 4.02910  |
| H | 4.63915  | 7.03429  | 2.97143  |
| C | 5.16347  | 6.93444  | 5.05510  |
| C | 12.84342 | 6.97269  | 0.39641  |
| H | 12.89693 | 5.98314  | 0.85714  |
| H | 13.68691 | 7.06195  | -0.30144 |
| H | 11.92114 | 7.00932  | -0.18861 |
| C | 6.46597  | 4.94237  | 3.94553  |
| H | 6.29098  | 5.39484  | 2.96648  |
| H | 5.81117  | 4.06482  | 4.03166  |
| H | 7.50042  | 4.59161  | 3.96270  |
| C | 7.89953  | 4.99042  | 6.80190  |



|   |          |          |         |
|---|----------|----------|---------|
| H | 8.53385  | 4.66883  | 5.97301 |
| H | 7.45463  | 4.09566  | 7.25600 |
| H | 8.54467  | 5.46009  | 7.54794 |
| C | 14.45535 | 6.87260  | 3.15949 |
| H | 14.53208 | 6.86567  | 4.24950 |
| H | 15.47352 | 6.93499  | 2.75256 |
| H | 14.03452 | 5.91074  | 2.85625 |
| H | 8.75395  | 7.90374  | 5.64234 |
| H | 11.00639 | 6.87600  | 3.38380 |
| H | 11.05433 | 8.32689  | 4.69538 |
| H | 9.89614  | 8.28392  | 2.61431 |
| H | 7.16374  | 9.51714  | 5.65975 |
| H | 7.47424  | 8.25469  | 3.80666 |
| H | 11.12108 | 10.79615 | 5.52292 |
| H | 9.26661  | 12.08800 | 5.39029 |
| H | 9.31560  | 10.26647 | 6.73726 |
| H | 7.21732  | 11.12376 | 3.61113 |
| H | 9.23142  | 11.96731 | 2.98432 |
| H | 8.42448  | 10.10148 | 2.01512 |

2-1 lig bend-s-disp

|    |          |          |         |
|----|----------|----------|---------|
| Th | 9.14708  | 9.84227  | 4.30613 |
| Ir | 10.28281 | 11.45554 | 6.54956 |
| Ir | 7.86706  | 11.52712 | 2.20051 |
| Ir | 7.14931  | 7.94568  | 5.40050 |
| Ir | 11.30130 | 8.33894  | 3.04122 |
| C  | 7.35243  | 11.82089 | 0.04452 |
| C  | 11.87087 | 12.87540 | 7.23173 |
| C  | 9.79133  | 12.75181 | 8.28994 |

|   |          |          |          |
|---|----------|----------|----------|
| C | 10.57660 | 13.50452 | 7.36039  |
| C | 11.87170 | 11.72452 | 8.10149  |
| C | 8.13227  | 12.95251 | 0.49320  |
| C | 10.59811 | 11.63665 | 8.74956  |
| C | 7.38179  | 13.59613 | 1.54197  |
| C | 6.15819  | 12.87854 | 1.74249  |
| C | 10.15684 | 14.76323 | 6.67263  |
| H | 10.61359 | 14.84029 | 5.68351  |
| H | 10.45700 | 15.64266 | 7.25549  |
| H | 9.07355  | 14.79683 | 6.53974  |
| C | 6.14859  | 7.14196  | 7.21965  |
| C | 13.51633 | 8.25986  | 2.66457  |
| C | 13.03317 | 10.81570 | 8.34058  |
| H | 12.70150 | 9.79669  | 8.55058  |
| H | 13.62329 | 11.16608 | 9.19622  |
| H | 13.69272 | 10.77769 | 7.47198  |
| C | 11.99403 | 11.71675 | 2.78816  |
| H | 11.03165 | 11.96380 | 2.32950  |
| H | 12.74777 | 12.40069 | 2.37461  |
| H | 11.90768 | 11.92099 | 3.85914  |
| C | 9.39763  | 13.45638 | -0.12076 |
| H | 10.01645 | 13.97258 | 0.61725  |
| H | 9.19012  | 14.16212 | -0.93574 |
| H | 9.99408  | 12.63936 | -0.53331 |
| C | 10.19757 | 10.64555 | 9.79321  |
| H | 9.13022  | 10.42150 | 9.73142  |
| H | 10.40611 | 11.02714 | 10.80104 |
| H | 10.73797 | 9.70451  | 9.67019  |

|   |          |          |          |
|---|----------|----------|----------|
| C | 7.79393  | 14.84035 | 2.25985  |
| H | 7.37528  | 14.87059 | 3.26782  |
| H | 7.44952  | 15.73071 | 1.71978  |
| H | 8.88066  | 14.89826 | 2.35077  |
| C | 12.37454 | 10.29372 | 2.53306  |
| C | 8.42181  | 13.09210 | 8.78141  |
| H | 7.86733  | 13.66985 | 8.03864  |
| H | 8.47089  | 13.68470 | 9.70388  |
| H | 7.84603  | 12.18775 | 8.99138  |
| C | 6.37703  | 7.54837  | 8.63912  |
| H | 7.42381  | 7.41469  | 8.92183  |
| H | 5.76179  | 6.95649  | 9.32959  |
| H | 6.13097  | 8.60227  | 8.78876  |
| C | 5.01881  | 10.80330 | 0.62515  |
| H | 5.37748  | 9.84968  | 0.23196  |
| H | 4.27036  | 11.19929 | -0.07301 |
| H | 4.52010  | 10.60041 | 1.57558  |
| C | 12.83032 | 8.30754  | 1.39120  |
| C | 6.22438  | 5.93080  | 5.22458  |
| C | 11.32751 | 10.05670 | 0.16586  |
| H | 10.93124 | 9.23262  | -0.43139 |
| H | 11.94778 | 10.68468 | -0.48648 |
| H | 10.48053 | 10.65024 | 0.51934  |
| C | 12.12363 | 9.55124  | 1.32310  |
| C | 6.80798  | 6.05814  | 6.52352  |
| C | 5.14577  | 7.67050  | 6.32974  |
| C | 13.03479 | 13.41156 | 6.46363  |
| H | 13.70315 | 12.60944 | 6.14293  |

|   |          |          |          |
|---|----------|----------|----------|
| H | 13.62230 | 14.11451 | 7.06859  |
| H | 12.70465 | 13.93992 | 5.56575  |
| C | 4.18871  | 8.76983  | 6.65826  |
| H | 4.63578  | 9.48817  | 7.34858  |
| H | 3.28407  | 8.36447  | 7.12768  |
| H | 3.89023  | 9.31390  | 5.75981  |
| C | 5.04311  | 13.25991 | 2.66077  |
| H | 4.53040  | 12.37520 | 3.04523  |
| H | 4.30148  | 13.88263 | 2.14389  |
| H | 5.41496  | 13.82294 | 3.51971  |
| C | 13.77739 | 9.89343  | 4.68338  |
| H | 13.04493 | 10.49524 | 5.22595  |
| H | 14.69214 | 10.48568 | 4.55233  |
| H | 14.01856 | 9.02609  | 5.30158  |
| C | 6.14427  | 11.76900 | 0.80779  |
| C | 7.71840  | 10.90401 | -1.07707 |
| H | 8.80161  | 10.80814 | -1.17235 |
| H | 7.32792  | 11.28434 | -2.02900 |
| H | 7.31101  | 9.90350  | -0.91767 |
| C | 13.22459 | 9.47807  | 3.36085  |
| C | 4.26172  | 7.09923  | 3.93659  |
| H | 3.90501  | 8.12861  | 3.85753  |
| H | 3.38646  | 6.44343  | 4.03108  |
| H | 4.76592  | 6.85476  | 2.99894  |
| C | 5.18576  | 6.93755  | 5.09924  |
| C | 12.94368 | 7.29376  | 0.29875  |
| H | 13.06097 | 6.28687  | 0.70594  |
| H | 13.81007 | 7.50114  | -0.34261 |

|                       |          |          |          |
|-----------------------|----------|----------|----------|
| H                     | 12.05190 | 7.29097  | -0.33211 |
| C                     | 6.55894  | 4.89611  | 4.20048  |
| H                     | 6.41495  | 5.28423  | 3.18985  |
| H                     | 5.92215  | 4.01016  | 4.31805  |
| H                     | 7.60065  | 4.58024  | 4.28399  |
| C                     | 7.88047  | 5.18736  | 7.09279  |
| H                     | 8.54512  | 4.81792  | 6.30944  |
| H                     | 7.44323  | 4.32315  | 7.60795  |
| H                     | 8.49110  | 5.73667  | 7.81249  |
| C                     | 14.46156 | 7.19197  | 3.11191  |
| H                     | 14.48975 | 7.12232  | 4.20173  |
| H                     | 15.48166 | 7.39351  | 2.75993  |
| H                     | 14.16134 | 6.21390  | 2.72892  |
| H                     | 8.70586  | 8.04676  | 5.84453  |
| H                     | 10.99038 | 6.78724  | 3.11978  |
| H                     | 10.89274 | 8.05516  | 4.57602  |
| H                     | 9.77611  | 8.18536  | 2.53836  |
| H                     | 7.05703  | 9.56656  | 5.45835  |
| H                     | 7.61999  | 8.04209  | 3.84941  |
| H                     | 11.00975 | 10.19787 | 5.82881  |
| H                     | 9.81122  | 12.01115 | 5.10355  |
| H                     | 8.94311  | 10.54816 | 6.61263  |
| H                     | 7.10371  | 10.53294 | 3.22616  |
| H                     | 8.79695  | 12.04847 | 3.42028  |
| H                     | 8.91611  | 10.32186 | 1.93728  |
| <b>2-2 lig bend-s</b> |          |          |          |
| Th                    | 9.18582  | 10.00961 | 4.36764  |
| Ir                    | 10.23559 | 11.70123 | 6.65949  |

|    |          |          |          |
|----|----------|----------|----------|
| Ir | 7.86759  | 11.74594 | 2.23899  |
| Ir | 7.16784  | 8.09066  | 5.38399  |
| Ir | 11.40477 | 8.46454  | 3.13841  |
| C  | 7.33011  | 12.03176 | 0.07267  |
| C  | 11.74497 | 13.23680 | 7.30224  |
| C  | 9.74623  | 12.93421 | 8.47592  |
| C  | 10.43123 | 13.76601 | 7.51292  |
| C  | 11.88821 | 12.06110 | 8.14376  |
| C  | 8.14970  | 13.13332 | 0.48890  |
| C  | 10.66252 | 11.88611 | 8.86188  |
| C  | 7.43587  | 13.83520 | 1.54078  |
| C  | 6.19335  | 13.16142 | 1.75791  |
| C  | 9.88942  | 15.02770 | 6.91507  |
| H  | 10.32807 | 15.22442 | 5.93425  |
| H  | 10.11175 | 15.88579 | 7.56242  |
| H  | 8.80548  | 14.97588 | 6.78908  |
| C  | 5.83406  | 7.25544  | 7.00662  |
| C  | 13.57317 | 8.01134  | 2.66829  |
| C  | 13.14560 | 11.27243 | 8.34058  |
| H  | 12.92932 | 10.24075 | 8.62778  |
| H  | 13.76639 | 11.71780 | 9.12951  |
| H  | 13.74470 | 11.23844 | 7.42771  |
| C  | 12.55593 | 11.64319 | 2.35089  |
| H  | 11.60479 | 11.96090 | 1.91613  |
| H  | 13.36277 | 12.14693 | 1.79931  |
| H  | 12.58271 | 12.00773 | 3.38066  |
| C  | 9.41463  | 13.60056 | -0.16137 |
| H  | 10.09510 | 14.05308 | 0.56421  |

|   |          |          |          |
|---|----------|----------|----------|
| H | 9.20191  | 14.35424 | -0.93148 |
| H | 9.94591  | 12.77759 | -0.64448 |
| C | 10.41149 | 10.85419 | 9.91739  |
| H | 9.35256  | 10.59517 | 9.98174  |
| H | 10.72436 | 11.22940 | 10.90029 |
| H | 10.96539 | 9.93434  | 9.71708  |
| C | 7.87505  | 15.11684 | 2.17836  |
| H | 7.44350  | 15.23764 | 3.17463  |
| H | 7.56600  | 15.97860 | 1.57199  |
| H | 8.96191  | 15.15656 | 2.28351  |
| C | 12.71560 | 10.15532 | 2.29263  |
| C | 8.41798  | 13.22458 | 9.10367  |
| H | 7.74223  | 13.71514 | 8.39871  |
| H | 8.52736  | 13.88540 | 9.97441  |
| H | 7.92771  | 12.30940 | 9.44479  |
| C | 6.07962  | 6.04009  | 7.84775  |
| H | 6.19333  | 5.14553  | 7.23040  |
| H | 5.24635  | 5.86390  | 8.54117  |
| H | 6.99122  | 6.14276  | 8.44153  |
| C | 4.92951  | 11.15333 | 0.62487  |
| H | 5.22888  | 10.14881 | 0.31599  |
| H | 4.27931  | 11.56546 | -0.15891 |
| H | 4.32787  | 11.05035 | 1.53072  |
| C | 12.81145 | 7.97844  | 1.43887  |
| C | 4.96977  | 8.66656  | 5.37031  |
| C | 11.49742 | 9.74362  | 0.02644  |
| H | 10.99287 | 8.90347  | -0.45614 |
| H | 12.15760 | 10.21125 | -0.71599 |

|   |          |          |          |
|---|----------|----------|----------|
| H | 10.73242 | 10.46943 | 0.31346  |
| C | 12.27970 | 9.29611  | 1.22188  |
| C | 5.08168  | 7.29377  | 5.77234  |
| C | 6.16830  | 8.61142  | 7.35254  |
| C | 12.83275 | 13.86454 | 6.48677  |
| H | 13.52753 | 13.11355 | 6.10273  |
| H | 13.41396 | 14.57380 | 7.09108  |
| H | 12.42836 | 14.40952 | 5.63025  |
| C | 6.86332  | 9.04966  | 8.60385  |
| H | 7.50151  | 8.25782  | 9.00262  |
| H | 6.13291  | 9.31596  | 9.37921  |
| H | 7.49590  | 9.91997  | 8.41247  |
| C | 5.10302  | 13.60677 | 2.68279  |
| H | 4.52796  | 12.75863 | 3.06194  |
| H | 4.40551  | 14.27569 | 2.16229  |
| H | 5.50525  | 14.14614 | 3.54347  |
| C | 14.21986 | 9.85271  | 4.40239  |
| H | 13.64303 | 10.63376 | 4.90360  |
| H | 15.19537 | 10.27329 | 4.12449  |
| H | 14.39410 | 9.05366  | 5.12660  |
| C | 6.11981  | 12.03223 | 0.85288  |
| C | 7.62473  | 11.09361 | -1.05661 |
| H | 8.69875  | 10.99079 | -1.22427 |
| H | 7.17396  | 11.46396 | -1.98628 |
| H | 7.22188  | 10.09693 | -0.86277 |
| C | 13.49897 | 9.34606  | 3.19222  |
| C | 5.57163  | 10.98978 | 6.42768  |
| H | 6.42530  | 11.39186 | 6.97969  |



|   |          |          |          |
|---|----------|----------|----------|
| H | 4.65624  | 11.32762 | 6.93448  |
| H | 5.58697  | 11.44266 | 5.43212  |
| C | 5.62247  | 9.49423  | 6.35549  |
| C | 12.72146 | 6.81980  | 0.49334  |
| H | 12.75220 | 5.86705  | 1.02762  |
| H | 13.55455 | 6.82908  | -0.22223 |
| H | 11.79062 | 6.84175  | -0.07852 |
| C | 4.20174  | 9.17723  | 4.19155  |
| H | 4.68717  | 10.05639 | 3.76106  |
| H | 3.18105  | 9.45665  | 4.48446  |
| H | 4.12991  | 8.42246  | 3.40516  |
| C | 4.43132  | 6.12017  | 5.10554  |
| H | 4.33257  | 6.27671  | 4.02865  |
| H | 3.42660  | 5.94375  | 5.51214  |
| H | 5.01393  | 5.20708  | 5.25008  |
| C | 14.40306 | 6.89108  | 3.21665  |
| H | 14.49935 | 6.96016  | 4.30287  |
| H | 15.41457 | 6.90490  | 2.78916  |
| H | 13.95918 | 5.91862  | 2.99015  |
| H | 7.79928  | 6.73684  | 4.86673  |
| H | 10.95011 | 6.99047  | 3.48670  |
| H | 11.10551 | 8.48227  | 4.72377  |
| H | 9.86962  | 8.37693  | 2.65261  |
| H | 8.69920  | 8.12156  | 5.88888  |
| H | 7.45586  | 8.34862  | 3.81710  |
| H | 11.11781 | 10.96844 | 5.50944  |
| H | 9.18001  | 12.15559 | 5.51530  |
| H | 9.41039  | 10.30875 | 6.79230  |

|   |         |          |         |
|---|---------|----------|---------|
| H | 7.18316 | 11.17158 | 3.59277 |
| H | 9.18766 | 12.11248 | 3.11049 |
| H | 8.48572 | 10.25917 | 2.02876 |

2-2 lig bend-s-disp

|    |          |          |         |
|----|----------|----------|---------|
| Th | 9.17719  | 9.74899  | 4.35817 |
| Ir | 10.28835 | 11.42056 | 6.58079 |
| Ir | 7.85159  | 11.44158 | 2.26655 |
| Ir | 7.16864  | 7.98176  | 5.48175 |
| Ir | 11.40226 | 8.38397  | 3.09648 |
| C  | 7.40198  | 11.86604 | 0.10921 |
| C  | 11.82226 | 12.93862 | 7.16144 |
| C  | 9.79601  | 12.74696 | 8.31194 |
| C  | 10.51450 | 13.50333 | 7.31813 |
| C  | 11.91877 | 11.80856 | 8.06555 |
| C  | 8.16710  | 12.96551 | 0.65898 |
| C  | 10.67882 | 11.69789 | 8.76855 |
| C  | 7.38515  | 13.53976 | 1.71878 |
| C  | 6.14716  | 12.81826 | 1.82865 |
| C  | 9.99571  | 14.71375 | 6.61118 |
| H  | 10.44218 | 14.81274 | 5.61954 |
| H  | 10.22563 | 15.62201 | 7.18135 |
| H  | 8.91248  | 14.65929 | 6.48352 |
| C  | 5.67562  | 7.66924  | 7.14205 |
| C  | 13.60471 | 8.38785  | 2.60782 |
| C  | 13.13924 | 10.98091 | 8.30359 |
| H  | 12.87519 | 9.96488  | 8.60472 |
| H  | 13.75852 | 11.42047 | 9.09564 |
| H  | 13.75158 | 10.90841 | 7.40285 |

|   |          |          |          |
|---|----------|----------|----------|
| C | 11.91683 | 11.76780 | 2.78623  |
| H | 10.92124 | 11.95096 | 2.36973  |
| H | 12.60742 | 12.50181 | 2.34943  |
| H | 11.85470 | 11.96029 | 3.86165  |
| C | 9.45558  | 13.49980 | 0.12436  |
| H | 10.03727 | 13.98779 | 0.90993  |
| H | 9.27748  | 14.23741 | -0.66863 |
| H | 10.07538 | 12.70428 | -0.29521 |
| C | 10.37852 | 10.71795 | 9.85512  |
| H | 9.30948  | 10.50756 | 9.91569  |
| H | 10.69954 | 11.11276 | 10.82685 |
| H | 10.89374 | 9.77025  | 9.68632  |
| C | 7.77237  | 14.72844 | 2.53851  |
| H | 7.32028  | 14.68451 | 3.53163  |
| H | 7.44241  | 15.65564 | 2.05455  |
| H | 8.85527  | 14.77987 | 2.66955  |
| C | 12.37295 | 10.37050 | 2.50881  |
| C | 8.45461  | 13.08592 | 8.87489  |
| H | 7.80291  | 13.52134 | 8.11341  |
| H | 8.54071  | 13.80861 | 9.69659  |
| H | 7.95303  | 12.19851 | 9.26534  |
| C | 5.67917  | 6.56138  | 8.14509  |
| H | 5.62026  | 5.58673  | 7.65549  |
| H | 4.82564  | 6.64654  | 8.82997  |
| H | 6.59333  | 6.57312  | 8.74281  |
| C | 5.04401  | 10.84288 | 0.51329  |
| H | 5.41442  | 9.88198  | 0.15011  |
| H | 4.39134  | 11.26981 | -0.25837 |

|   |          |          |          |
|---|----------|----------|----------|
| H | 4.43294  | 10.65007 | 1.39670  |
| C | 12.85355 | 8.38602  | 1.37261  |
| C | 5.13854  | 8.95962  | 5.28445  |
| C | 11.24654 | 10.06000 | 0.18485  |
| H | 10.83895 | 9.21329  | -0.37137 |
| H | 11.83217 | 10.67524 | -0.51035 |
| H | 10.40542 | 10.65109 | 0.55343  |
| C | 12.09712 | 9.60287  | 1.32212  |
| C | 4.97285  | 7.66614  | 5.87809  |
| C | 6.26667  | 8.96316  | 7.30809  |
| C | 12.92788 | 13.49004 | 6.32219  |
| H | 13.59582 | 12.69916 | 5.97499  |
| H | 13.53029 | 14.21073 | 6.88967  |
| H | 12.53646 | 14.00144 | 5.43979  |
| C | 7.03324  | 9.43737  | 8.49720  |
| H | 7.50278  | 8.60399  | 9.02401  |
| H | 6.37281  | 9.95916  | 9.20161  |
| H | 7.82480  | 10.12262 | 8.18596  |
| C | 4.99583  | 13.17044 | 2.71258  |
| H | 4.40334  | 12.28817 | 2.96485  |
| H | 4.32804  | 13.89185 | 2.22436  |
| H | 5.33866  | 13.61352 | 3.65067  |
| C | 13.89729 | 10.05003 | 4.59390  |
| H | 13.16513 | 10.61592 | 5.17348  |
| H | 14.77265 | 10.68774 | 4.41615  |
| H | 14.21344 | 9.19862  | 5.20013  |
| C | 6.16761  | 11.77693 | 0.82337  |
| C | 7.78995  | 11.03805 | -1.07181 |

|   |          |          |          |
|---|----------|----------|----------|
| H | 8.87413  | 10.93977 | -1.14961 |
| H | 7.42722  | 11.49720 | -1.99992 |
| H | 7.36975  | 10.03228 | -1.00491 |
| C | 13.29846 | 9.60150  | 3.30276  |
| C | 6.20649  | 11.23911 | 6.01647  |
| H | 7.15801  | 11.51391 | 6.48220  |
| H | 5.41482  | 11.84105 | 6.48258  |
| H | 6.27123  | 11.52307 | 4.96229  |
| C | 5.92919  | 9.77770  | 6.16831  |
| C | 12.95589 | 7.36452  | 0.28638  |
| H | 13.13418 | 6.36825  | 0.69738  |
| H | 13.78028 | 7.59918  | -0.39936 |
| H | 12.03500 | 7.31713  | -0.29910 |
| C | 4.51894  | 9.42550  | 4.00955  |
| H | 5.16412  | 10.15819 | 3.52027  |
| H | 3.54180  | 9.88784  | 4.19958  |
| H | 4.37462  | 8.59641  | 3.31375  |
| C | 4.12104  | 6.55652  | 5.35165  |
| H | 4.06571  | 6.58542  | 4.26113  |
| H | 3.09797  | 6.62465  | 5.74348  |
| H | 4.52428  | 5.58123  | 5.63335  |
| C | 14.60869 | 7.36156  | 3.02325  |
| H | 14.68838 | 7.30368  | 4.11109  |
| H | 15.60289 | 7.59928  | 2.62356  |
| H | 14.33010 | 6.36903  | 2.66221  |
| H | 7.59943  | 6.47501  | 5.25729  |
| H | 11.20494 | 6.82254  | 3.26518  |
| H | 11.08281 | 8.16095  | 4.66205  |

|   |          |          |         |
|---|----------|----------|---------|
| H | 9.88806  | 8.08571  | 2.63193 |
| H | 8.70360  | 7.89307  | 5.96855 |
| H | 7.56316  | 7.87063  | 3.92243 |
| H | 11.14729 | 10.50364 | 5.56125 |
| H | 9.36469  | 11.91190 | 5.34632 |
| H | 9.35124  | 10.10928 | 6.75708 |
| H | 7.15736  | 10.22887 | 3.08243 |
| H | 8.58324  | 11.93534 | 3.62229 |
| H | 9.03833  | 10.36982 | 2.01363 |

**Table S9.** Atomic coordinates for the computed structures of **3** (Ir-centered H<sup>-</sup>) at different spin states (singlet (sing), triplet (t) and quintet (q))

**3-Ir-centered-H-sing**

|    |          |          |          |
|----|----------|----------|----------|
| C  | 7.77553  | -1.50989 | 14.79934 |
| C  | 7.81070  | -0.11101 | 14.44151 |
| C  | 9.11304  | 0.39247  | 14.81757 |
| C  | 9.86968  | -0.67974 | 15.38973 |
| C  | 9.03666  | -1.86928 | 15.37614 |
| Ir | 9.37058  | -1.20263 | 13.25879 |
| U  | 10.35233 | -1.97267 | 10.52888 |
| U  | 11.03756 | 0.54779  | 7.79814  |
| Ir | 12.00832 | -0.10419 | 5.06126  |
| C  | 13.60223 | 0.23407  | 3.52657  |
| C  | 13.56074 | -1.17242 | 3.84453  |
| C  | 12.25434 | -1.65908 | 3.45838  |
| C  | 11.50364 | -0.56838 | 2.91689  |
| C  | 12.34098 | 0.61674  | 2.96249  |
| C  | 14.71048 | -2.01488 | 4.30232  |
| C  | 11.81554 | -3.08946 | 3.52070  |
| C  | 10.15381 | -0.64853 | 2.27471  |
| C  | 11.99430 | 1.95237  | 2.38113  |
| C  | 14.79651 | 1.12499  | 3.67816  |
| C  | 6.65572  | 0.70954  | 13.95746 |
| C  | 9.54573  | 1.82275  | 14.71881 |
| C  | 11.21670 | -0.57637 | 16.03503 |
| C  | 9.39017  | -3.18762 | 15.99197 |
| C  | 6.58352  | -2.40815 | 14.67547 |
| Ir | 12.68114 | -0.57420 | 9.81173  |
| C  | 14.96328 | -0.32204 | 9.39216  |

|    |          |          |          |
|----|----------|----------|----------|
| C  | 14.71007 | -1.61440 | 9.99714  |
| C  | 14.25189 | -1.40677 | 11.34161 |
| C  | 14.09569 | 0.00585  | 11.52242 |
| C  | 14.57453 | 0.67731  | 10.32843 |
| C  | 14.03710 | -2.46558 | 12.37882 |
| C  | 15.05693 | -2.94015 | 9.39137  |
| C  | 15.62241 | -0.08990 | 8.06814  |
| C  | 14.74087 | 2.15658  | 10.16919 |
| C  | 13.69211 | 0.68498  | 12.79550 |
| Ir | 10.66093 | -4.93419 | 10.18635 |
| C  | 9.62276  | -6.92220 | 10.18631 |
| C  | 10.64312 | -6.94003 | 11.18983 |
| C  | 11.92284 | -6.76088 | 10.52687 |
| C  | 11.66907 | -6.63338 | 9.12158  |
| C  | 10.24748 | -6.72735 | 8.89598  |
| C  | 10.44898 | -7.22595 | 12.64682 |
| C  | 13.26409 | -6.85993 | 11.18546 |
| C  | 12.70652 | -6.52227 | 8.04741  |
| C  | 9.56957  | -6.80253 | 7.56350  |
| C  | 8.16369  | -7.16886 | 10.41729 |
| Ir | 8.70782  | -0.86883 | 8.50839  |
| C  | 6.48184  | -1.47176 | 8.90421  |
| C  | 6.56925  | -0.06382 | 8.60062  |
| C  | 6.98754  | 0.08724  | 7.22835  |
| C  | 7.28014  | -1.21615 | 6.72758  |
| C  | 6.96530  | -2.18250 | 7.76510  |
| C  | 7.03073  | 1.36668  | 6.45209  |
| C  | 6.09595  | 1.04613  | 9.48907  |



|    |          |          |          |
|----|----------|----------|----------|
| C  | 5.89672  | -2.07338 | 10.14412 |
| C  | 6.98116  | -3.67039 | 7.59760  |
| C  | 7.68819  | -1.54660 | 5.32536  |
| Ir | 10.75792 | 3.49207  | 8.10488  |
| C  | 11.78409 | 5.48399  | 8.05842  |
| C  | 10.74799 | 5.48055  | 7.06604  |
| C  | 9.48328  | 5.31047  | 7.75771  |
| C  | 9.75422  | 5.20617  | 9.15818  |
| C  | 11.18455 | 5.30879  | 9.35665  |
| C  | 10.91570 | 5.75937  | 5.60458  |
| C  | 8.13296  | 5.37554  | 7.11433  |
| C  | 8.73802  | 5.11942  | 10.25468 |
| C  | 11.88473 | 5.39624  | 10.67710 |
| C  | 13.23919 | 5.72342  | 7.79689  |
| H  | 6.32398  | -3.05850 | 10.35029 |
| H  | 4.80847  | -2.19697 | 10.04537 |
| H  | 6.08315  | -1.44847 | 11.02109 |
| H  | 12.91564 | 5.04149  | 10.60357 |
| H  | 11.38333 | 4.78837  | 11.43450 |
| H  | 11.91362 | 6.43133  | 11.04479 |
| H  | 13.46175 | 6.79786  | 7.82605  |
| H  | 13.53465 | 5.34588  | 6.81524  |
| H  | 13.86555 | 5.23210  | 8.54479  |
| H  | 7.37477  | 4.87470  | 7.72084  |
| H  | 8.13673  | 4.90027  | 6.13034  |
| H  | 7.81686  | 6.41867  | 6.98088  |
| H  | 6.25419  | 0.80419  | 10.54266 |
| H  | 5.02401  | 1.23727  | 9.34358  |

|   |          |          |          |
|---|----------|----------|----------|
| H | 6.63355  | 1.97444  | 9.28036  |
| H | 9.10438  | 4.51544  | 11.08817 |
| H | 7.80621  | 4.66924  | 9.90530  |
| H | 8.50261  | 6.11950  | 10.64192 |
| H | 10.16415 | 5.23363  | 5.01028  |
| H | 11.89711 | 5.43673  | 5.24865  |
| H | 10.81904 | 6.83305  | 5.39279  |
| H | 9.57797  | 0.26565  | 2.43967  |
| H | 9.56978  | -1.48351 | 2.66818  |
| H | 10.24907 | -0.79014 | 1.18980  |
| H | 7.75557  | -3.98168 | 6.89276  |
| H | 6.01625  | -4.03404 | 7.21786  |
| H | 7.18728  | -4.17304 | 8.54585  |
| H | 7.78455  | 1.32714  | 5.66087  |
| H | 7.28273  | 2.21530  | 7.09202  |
| H | 6.05950  | 1.57595  | 5.98080  |
| H | 12.23917 | 1.99275  | 1.31099  |
| H | 12.53968 | 2.75760  | 2.87898  |
| H | 10.92781 | 2.16618  | 2.48676  |
| H | 6.81042  | -1.64440 | 4.67160  |
| H | 8.23904  | -2.48961 | 5.28599  |
| H | 8.34127  | -0.77467 | 4.91093  |
| H | 15.41851 | 0.81817  | 4.52213  |
| H | 14.50009 | 2.16310  | 3.84510  |
| H | 15.41721 | 1.09241  | 2.77344  |
| H | 14.37298 | -2.84047 | 4.93391  |
| H | 15.42727 | -1.42870 | 4.88261  |
| H | 15.25068 | -2.44656 | 3.44833  |

|   |          |          |          |
|---|----------|----------|----------|
| H | 12.13716 | -3.63016 | 2.62093  |
| H | 10.72881 | -3.17299 | 3.59123  |
| H | 12.24361 | -3.59791 | 4.38783  |
| H | 15.34614 | 0.88283  | 7.65386  |
| H | 16.71728 | -0.11785 | 8.16319  |
| H | 15.33058 | -0.84717 | 7.33676  |
| H | 8.53897  | -6.44500 | 7.62065  |
| H | 10.08607 | -6.19097 | 6.81941  |
| H | 9.54412  | -7.83514 | 7.18862  |
| H | 7.94060  | -8.24205 | 10.35749 |
| H | 7.85007  | -6.81546 | 11.40231 |
| H | 7.54952  | -6.65991 | 9.67079  |
| H | 14.03083 | -6.32700 | 10.61794 |
| H | 13.24558 | -6.43638 | 12.19276 |
| H | 13.58230 | -7.90774 | 11.27082 |
| H | 15.00267 | -2.90123 | 8.30064  |
| H | 16.07538 | -3.24685 | 9.66605  |
| H | 14.36359 | -3.71554 | 9.72759  |
| H | 12.34011 | -5.93613 | 7.20151  |
| H | 13.61514 | -6.04051 | 8.41484  |
| H | 12.98035 | -7.51775 | 7.67447  |
| H | 11.19522 | -6.71069 | 13.25661 |
| H | 9.46422  | -6.89855 | 12.98851 |
| H | 10.53487 | -8.30181 | 12.85033 |
| H | 11.80254 | -1.48673 | 15.88456 |
| H | 11.79321 | 0.25940  | 15.63197 |
| H | 11.11764 | -0.42015 | 17.11758 |
| H | 13.95873 | 2.70357  | 10.70066 |

|   |          |          |          |
|---|----------|----------|----------|
| H | 15.71140 | 2.48927  | 10.56349 |
| H | 14.68264 | 2.45243  | 9.11873  |
| H | 13.27611 | -2.16522 | 13.10465 |
| H | 13.70603 | -3.40619 | 11.93002 |
| H | 14.96442 | -2.66790 | 12.93400 |
| H | 9.14104  | -3.20229 | 17.06171 |
| H | 8.85224  | -4.00863 | 15.51218 |
| H | 10.45854 | -3.39665 | 15.89641 |
| H | 14.55572 | 0.81946  | 13.46111 |
| H | 13.26710 | 1.67217  | 12.59779 |
| H | 12.93542 | 0.10458  | 13.32953 |
| H | 5.96270  | -2.13307 | 13.81976 |
| H | 6.88144  | -3.45122 | 14.54666 |
| H | 5.96001  | -2.34417 | 15.57657 |
| H | 6.99148  | 1.53918  | 13.33049 |
| H | 5.96229  | 0.10920  | 13.36300 |
| H | 6.08935  | 1.13373  | 14.79811 |
| H | 9.22515  | 2.38259  | 15.60710 |
| H | 10.63172 | 1.90976  | 14.64143 |
| H | 9.11183  | 2.30901  | 13.84199 |
| H | 10.32874 | 2.34767  | 9.18008  |
| H | 12.13060 | 2.64771  | 7.89053  |
| H | 10.09587 | 2.55404  | 6.95120  |
| H | 11.58200 | -1.14825 | 6.23570  |
| H | 10.66449 | 0.73337  | 5.44949  |
| H | 12.76807 | 0.77063  | 6.20093  |
| H | 9.83840  | -0.19166 | 12.07746 |
| H | 8.58233  | -2.03951 | 12.11233 |

|   |          |          |          |
|---|----------|----------|----------|
| H | 10.70903 | -2.05719 | 12.90069 |
| H | 11.32039 | -3.77473 | 9.25999  |
| H | 11.12461 | -4.04716 | 11.46553 |
| H | 9.29015  | -4.05772 | 10.14303 |
| H | 10.01402 | -1.74491 | 8.07330  |
| H | 9.35602  | 0.12202  | 9.62623  |
| H | 11.39987 | 0.35657  | 10.20337 |
| H | 12.05279 | -1.51252 | 8.63893  |

**3-Ir-centered-H-t**

|    |          |          |          |
|----|----------|----------|----------|
| C  | 10.99011 | 5.25709  | 9.56623  |
| C  | 11.59813 | 5.54165  | 8.28468  |
| C  | 10.57240 | 5.56067  | 7.28730  |
| C  | 9.30575  | 5.29301  | 7.94539  |
| C  | 9.57219  | 5.11266  | 9.34260  |
| Ir | 10.64665 | 3.50800  | 8.20220  |
| U  | 11.04691 | 0.57229  | 7.75170  |
| Ir | 8.75346  | -0.91998 | 8.46430  |
| C  | 6.88748  | -2.19421 | 7.93680  |
| C  | 6.48456  | -1.20670 | 8.88149  |
| C  | 6.71081  | 0.09292  | 8.28291  |
| C  | 7.16937  | -0.09814 | 6.93629  |
| C  | 7.34654  | -1.50702 | 6.74505  |
| C  | 5.82936  | -1.45779 | 10.20384 |
| C  | 6.34340  | 1.40827  | 8.89860  |
| C  | 7.37157  | 0.97364  | 5.90964  |
| C  | 7.74524  | -2.17154 | 5.46364  |
| C  | 6.74576  | -3.67713 | 8.08574  |
| C  | 13.04328 | 5.86494  | 8.06186  |

|    |          |          |          |
|----|----------|----------|----------|
| C  | 10.74399 | 5.92461  | 5.84485  |
| C  | 7.95873  | 5.36321  | 7.29539  |
| C  | 8.54643  | 4.91340  | 10.41518 |
| C  | 11.67210 | 5.29044  | 10.89866 |
| Ir | 11.99402 | -0.08181 | 5.00513  |
| C  | 12.61456 | 0.71653  | 3.00495  |
| C  | 13.71614 | -0.01988 | 3.56449  |
| C  | 13.28427 | -1.39567 | 3.71189  |
| C  | 11.93472 | -1.49476 | 3.25137  |
| C  | 11.50823 | -0.18009 | 2.81079  |
| C  | 15.10589 | 0.49362  | 3.78242  |
| C  | 14.15038 | -2.53346 | 4.15595  |
| C  | 11.14118 | -2.75731 | 3.11885  |
| C  | 10.21938 | 0.14261  | 2.11990  |
| C  | 12.64896 | 2.15895  | 2.60280  |
| Ir | 12.72038 | -0.52035 | 9.75574  |
| C  | 14.61478 | 0.77545  | 10.09061 |
| C  | 14.97758 | -0.34397 | 9.28443  |
| C  | 14.75505 | -1.54524 | 10.06766 |
| C  | 14.31167 | -1.16107 | 11.37321 |
| C  | 14.14650 | 0.26512  | 11.36163 |
| C  | 15.61473 | -0.29106 | 7.93040  |
| C  | 15.10424 | -2.93752 | 9.63761  |
| C  | 14.11861 | -2.06040 | 12.55491 |
| C  | 13.74308 | 1.10114  | 12.53797 |
| C  | 14.79967 | 2.22045  | 9.74682  |
| U  | 10.41198 | -1.99884 | 10.49739 |
| Ir | 10.73903 | -4.94982 | 10.22799 |

|    |          |          |          |
|----|----------|----------|----------|
| C  | 10.33838 | -6.78597 | 9.00203  |
| C  | 9.75166  | -6.95883 | 10.30734 |
| C  | 10.79470 | -6.92621 | 11.29064 |
| C  | 12.05138 | -6.73840 | 10.58826 |
| C  | 11.76798 | -6.65484 | 9.18855  |
| C  | 8.30287  | -7.22176 | 10.58095 |
| C  | 10.64432 | -7.19154 | 12.75651 |
| C  | 13.40726 | -6.77445 | 11.22279 |
| C  | 12.77449 | -6.56084 | 8.08367  |
| C  | 9.62905  | -6.90418 | 7.68895  |
| Ir | 9.37140  | -1.30403 | 13.20532 |
| C  | 9.02458  | -1.99434 | 15.31170 |
| C  | 7.76569  | -1.62873 | 14.73303 |
| C  | 7.80147  | -0.22611 | 14.39340 |
| C  | 9.10207  | 0.27348  | 14.77980 |
| C  | 9.85696  | -0.80476 | 15.34236 |
| C  | 6.57599  | -2.52699 | 14.58879 |
| C  | 6.64805  | 0.60167  | 13.91828 |
| C  | 9.53169  | 1.70588  | 14.70082 |
| C  | 11.20581 | -0.70795 | 15.98465 |
| C  | 9.37548  | -3.31994 | 15.91315 |
| H  | 6.10778  | -2.43587 | 10.60357 |
| H  | 4.73427  | -1.43042 | 10.11124 |
| H  | 6.12306  | -0.71060 | 10.94466 |
| H  | 12.72254 | 5.00085  | 10.81501 |
| H  | 11.19915 | 4.60303  | 11.60458 |
| H  | 11.64041 | 6.29713  | 11.33799 |
| H  | 13.22047 | 6.94061  | 8.19093  |

|   |          |          |          |
|---|----------|----------|----------|
| H | 13.36346 | 5.59135  | 7.05377  |
| H | 13.68576 | 5.33460  | 8.76844  |
| H | 7.22020  | 4.76663  | 7.83611  |
| H | 7.99342  | 4.99257  | 6.26782  |
| H | 7.59154  | 6.39796  | 7.26382  |
| H | 6.39830  | 1.36154  | 9.98892  |
| H | 5.32013  | 1.70030  | 8.62586  |
| H | 7.02420  | 2.19718  | 8.56808  |
| H | 8.93684  | 4.29680  | 11.22801 |
| H | 7.65044  | 4.42317  | 10.02847 |
| H | 8.24430  | 5.87958  | 10.83992 |
| H | 10.02429 | 5.39822  | 5.21296  |
| H | 11.74381 | 5.66978  | 5.48547  |
| H | 10.59710 | 7.00232  | 5.69267  |
| H | 9.92594  | 1.18166  | 2.28984  |
| H | 9.40381  | -0.49073 | 2.47823  |
| H | 10.30297 | -0.00790 | 1.03487  |
| H | 7.52816  | -4.20715 | 7.53765  |
| H | 5.77479  | -4.02156 | 7.70275  |
| H | 6.82409  | -3.98057 | 9.13271  |
| H | 8.14649  | 0.69731  | 5.18920  |
| H | 7.67842  | 1.91639  | 6.37136  |
| H | 6.44606  | 1.16260  | 5.34691  |
| H | 13.00544 | 2.26118  | 1.56967  |
| H | 13.31686 | 2.73578  | 3.24674  |
| H | 11.65749 | 2.61391  | 2.66169  |
| H | 6.86991  | -2.34990 | 4.82425  |
| H | 8.22560  | -3.13536 | 5.64904  |



|   |          |          |          |
|---|----------|----------|----------|
| H | 8.45436  | -1.55447 | 4.90635  |
| H | 15.59968 | -0.02898 | 4.60531  |
| H | 15.10384 | 1.55898  | 4.02655  |
| H | 15.72361 | 0.35868  | 2.88388  |
| H | 13.56174 | -3.32818 | 4.61982  |
| H | 14.89482 | -2.20500 | 4.88504  |
| H | 14.68821 | -2.96688 | 3.30234  |
| H | 11.29845 | -3.21095 | 2.13124  |
| H | 10.07081 | -2.57168 | 3.23185  |
| H | 11.42923 | -3.49155 | 3.87468  |
| H | 15.26015 | 0.56711  | 7.35383  |
| H | 16.70839 | -0.21851 | 8.01183  |
| H | 15.38361 | -1.18646 | 7.34836  |
| H | 8.59719  | -6.55209 | 7.76236  |
| H | 10.12256 | -6.31058 | 6.91534  |
| H | 9.60235  | -7.94690 | 7.34340  |
| H | 8.09865  | -8.30005 | 10.56293 |
| H | 8.00689  | -6.83969 | 11.56065 |
| H | 7.66354  | -6.74820 | 9.83257  |
| H | 14.15216 | -6.26197 | 10.60971 |
| H | 13.40028 | -6.29600 | 12.20538 |
| H | 13.74440 | -7.81063 | 11.35926 |
| H | 15.02304 | -3.04950 | 8.55350  |
| H | 16.13380 | -3.19224 | 9.92374  |
| H | 14.43164 | -3.67006 | 10.09109 |
| H | 12.38592 | -5.98288 | 7.24173  |
| H | 13.69567 | -6.07844 | 8.41745  |
| H | 13.03411 | -7.56138 | 7.71356  |

|   |          |          |          |
|---|----------|----------|----------|
| H | 11.37918 | -6.63142 | 13.34017 |
| H | 9.65355  | -6.90088 | 13.11390 |
| H | 10.78121 | -8.25817 | 12.98099 |
| H | 11.78399 | -1.62359 | 15.83733 |
| H | 11.78709 | 0.12046  | 15.57303 |
| H | 11.11192 | -0.54378 | 17.06652 |
| H | 13.97955 | 2.82989  | 10.13415 |
| H | 15.73915 | 2.60778  | 10.16621 |
| H | 14.83123 | 2.37089  | 8.66470  |
| H | 13.29864 | -1.71626 | 13.19152 |
| H | 13.88591 | -3.08366 | 12.24839 |
| H | 15.02694 | -2.09951 | 13.17355 |
| H | 9.12027  | -3.34806 | 16.98117 |
| H | 8.84071  | -4.13515 | 15.42013 |
| H | 10.44445 | -3.52730 | 15.82077 |
| H | 14.60404 | 1.30997  | 13.18750 |
| H | 13.32615 | 2.05930  | 12.21811 |
| H | 12.98120 | 0.59342  | 13.13519 |
| H | 5.96269  | -2.24192 | 13.73088 |
| H | 6.87705  | -3.56784 | 14.44943 |
| H | 5.94459  | -2.47551 | 15.48522 |
| H | 6.98360  | 1.42898  | 13.28791 |
| H | 5.94514  | 0.00521  | 13.33140 |
| H | 6.09224  | 1.03026  | 14.76378 |
| H | 9.19875  | 2.25593  | 15.59073 |
| H | 10.61818 | 1.79751  | 14.63769 |
| H | 9.10649  | 2.19948  | 13.82383 |
| H | 10.05108 | 2.28804  | 9.09204  |

|   |          |          |          |
|---|----------|----------|----------|
| H | 12.04996 | 2.68935  | 8.18426  |
| H | 10.23990 | 2.65428  | 6.88136  |
| H | 10.60514 | -0.56644 | 5.70102  |
| H | 11.70362 | 1.39196  | 5.61759  |
| H | 12.71613 | -0.45410 | 6.41298  |
| H | 9.83338  | -0.27979 | 12.02979 |
| H | 8.61826  | -2.16829 | 12.05401 |
| H | 10.69231 | -2.18832 | 12.85539 |
| H | 11.15403 | -3.81159 | 9.14307  |
| H | 11.35498 | -3.98778 | 11.38776 |
| H | 9.34981  | -4.12864 | 10.42023 |
| H | 10.05262 | -1.82346 | 8.07016  |
| H | 9.35594  | 0.03231  | 9.63815  |
| H | 11.41081 | 0.33940  | 10.20008 |
| H | 12.09045 | -1.52282 | 8.63815  |

**3-Ir-centered-H-q**

|    |          |          |         |
|----|----------|----------|---------|
| C  | 10.99011 | 5.25709  | 9.56623 |
| C  | 11.59813 | 5.54165  | 8.28468 |
| C  | 10.57240 | 5.56067  | 7.28730 |
| C  | 9.30575  | 5.29301  | 7.94539 |
| C  | 9.57219  | 5.11266  | 9.34260 |
| Ir | 10.64665 | 3.50800  | 8.20220 |
| U  | 11.04691 | 0.57229  | 7.75170 |
| Ir | 8.75346  | -0.91998 | 8.46430 |
| C  | 6.88748  | -2.19421 | 7.93680 |
| C  | 6.48456  | -1.20670 | 8.88149 |
| C  | 6.71081  | 0.09292  | 8.28291 |
| C  | 7.16937  | -0.09814 | 6.93629 |

|    |          |          |          |
|----|----------|----------|----------|
| C  | 7.34654  | -1.50702 | 6.74505  |
| C  | 5.82936  | -1.45779 | 10.20384 |
| C  | 6.34340  | 1.40827  | 8.89860  |
| C  | 7.37157  | 0.97364  | 5.90964  |
| C  | 7.74524  | -2.17154 | 5.46364  |
| C  | 6.74576  | -3.67713 | 8.08574  |
| C  | 13.04328 | 5.86494  | 8.06186  |
| C  | 10.74399 | 5.92461  | 5.84485  |
| C  | 7.95873  | 5.36321  | 7.29539  |
| C  | 8.54643  | 4.91340  | 10.41518 |
| C  | 11.67210 | 5.29044  | 10.89866 |
| Ir | 11.99402 | -0.08181 | 5.00513  |
| C  | 12.61456 | 0.71653  | 3.00495  |
| C  | 13.71614 | -0.01988 | 3.56449  |
| C  | 13.28427 | -1.39567 | 3.71189  |
| C  | 11.93472 | -1.49476 | 3.25137  |
| C  | 11.50823 | -0.18009 | 2.81079  |
| C  | 15.10589 | 0.49362  | 3.78242  |
| C  | 14.15038 | -2.53346 | 4.15595  |
| C  | 11.14118 | -2.75731 | 3.11885  |
| C  | 10.21938 | 0.14261  | 2.11990  |
| C  | 12.64896 | 2.15895  | 2.60280  |
| Ir | 12.72038 | -0.52035 | 9.75574  |
| C  | 14.61478 | 0.77545  | 10.09061 |
| C  | 14.97758 | -0.34397 | 9.28443  |
| C  | 14.75505 | -1.54524 | 10.06766 |
| C  | 14.31167 | -1.16107 | 11.37321 |
| C  | 14.14650 | 0.26512  | 11.36163 |

|    |          |          |          |
|----|----------|----------|----------|
| C  | 15.61473 | -0.29106 | 7.93040  |
| C  | 15.10424 | -2.93752 | 9.63761  |
| C  | 14.11861 | -2.06040 | 12.55491 |
| C  | 13.74308 | 1.10114  | 12.53797 |
| C  | 14.79967 | 2.22045  | 9.74682  |
| U  | 10.41198 | -1.99884 | 10.49739 |
| Ir | 10.73903 | -4.94982 | 10.22799 |
| C  | 10.33838 | -6.78597 | 9.00203  |
| C  | 9.75166  | -6.95883 | 10.30734 |
| C  | 10.79470 | -6.92621 | 11.29064 |
| C  | 12.05138 | -6.73840 | 10.58826 |
| C  | 11.76798 | -6.65484 | 9.18855  |
| C  | 8.30287  | -7.22176 | 10.58095 |
| C  | 10.64432 | -7.19154 | 12.75651 |
| C  | 13.40726 | -6.77445 | 11.22279 |
| C  | 12.77449 | -6.56084 | 8.08367  |
| C  | 9.62905  | -6.90418 | 7.68895  |
| Ir | 9.37140  | -1.30403 | 13.20532 |
| C  | 9.02458  | -1.99434 | 15.31170 |
| C  | 7.76569  | -1.62873 | 14.73303 |
| C  | 7.80147  | -0.22611 | 14.39340 |
| C  | 9.10207  | 0.27348  | 14.77980 |
| C  | 9.85696  | -0.80476 | 15.34236 |
| C  | 6.57599  | -2.52699 | 14.58879 |
| C  | 6.64805  | 0.60167  | 13.91828 |
| C  | 9.53169  | 1.70588  | 14.70082 |
| C  | 11.20581 | -0.70795 | 15.98465 |
| C  | 9.37548  | -3.31994 | 15.91315 |

|   |          |          |          |
|---|----------|----------|----------|
| H | 6.10778  | -2.43587 | 10.60357 |
| H | 4.73427  | -1.43042 | 10.11124 |
| H | 6.12306  | -0.71060 | 10.94466 |
| H | 12.72254 | 5.00085  | 10.81501 |
| H | 11.19915 | 4.60303  | 11.60458 |
| H | 11.64041 | 6.29713  | 11.33799 |
| H | 13.22047 | 6.94061  | 8.19093  |
| H | 13.36346 | 5.59135  | 7.05377  |
| H | 13.68576 | 5.33460  | 8.76844  |
| H | 7.22020  | 4.76663  | 7.83611  |
| H | 7.99342  | 4.99257  | 6.26782  |
| H | 7.59154  | 6.39796  | 7.26382  |
| H | 6.39830  | 1.36154  | 9.98892  |
| H | 5.32013  | 1.70030  | 8.62586  |
| H | 7.02420  | 2.19718  | 8.56808  |
| H | 8.93684  | 4.29680  | 11.22801 |
| H | 7.65044  | 4.42317  | 10.02847 |
| H | 8.24430  | 5.87958  | 10.83992 |
| H | 10.02429 | 5.39822  | 5.21296  |
| H | 11.74381 | 5.66978  | 5.48547  |
| H | 10.59710 | 7.00232  | 5.69267  |
| H | 9.92594  | 1.18166  | 2.28984  |
| H | 9.40381  | -0.49073 | 2.47823  |
| H | 10.30297 | -0.00790 | 1.03487  |
| H | 7.52816  | -4.20715 | 7.53765  |
| H | 5.77479  | -4.02156 | 7.70275  |
| H | 6.82409  | -3.98057 | 9.13271  |
| H | 8.14649  | 0.69731  | 5.18920  |

|   |          |          |          |
|---|----------|----------|----------|
| H | 7.67842  | 1.91639  | 6.37136  |
| H | 6.44606  | 1.16260  | 5.34691  |
| H | 13.00544 | 2.26118  | 1.56967  |
| H | 13.31686 | 2.73578  | 3.24674  |
| H | 11.65749 | 2.61391  | 2.66169  |
| H | 6.86991  | -2.34990 | 4.82425  |
| H | 8.22560  | -3.13536 | 5.64904  |
| H | 8.45436  | -1.55447 | 4.90635  |
| H | 15.59968 | -0.02898 | 4.60531  |
| H | 15.10384 | 1.55898  | 4.02655  |
| H | 15.72361 | 0.35868  | 2.88388  |
| H | 13.56174 | -3.32818 | 4.61982  |
| H | 14.89482 | -2.20500 | 4.88504  |
| H | 14.68821 | -2.96688 | 3.30234  |
| H | 11.29845 | -3.21095 | 2.13124  |
| H | 10.07081 | -2.57168 | 3.23185  |
| H | 11.42923 | -3.49155 | 3.87468  |
| H | 15.26015 | 0.56711  | 7.35383  |
| H | 16.70839 | -0.21851 | 8.01183  |
| H | 15.38361 | -1.18646 | 7.34836  |
| H | 8.59719  | -6.55209 | 7.76236  |
| H | 10.12256 | -6.31058 | 6.91534  |
| H | 9.60235  | -7.94690 | 7.34340  |
| H | 8.09865  | -8.30005 | 10.56293 |
| H | 8.00689  | -6.83969 | 11.56065 |
| H | 7.66354  | -6.74820 | 9.83257  |
| H | 14.15216 | -6.26197 | 10.60971 |
| H | 13.40028 | -6.29600 | 12.20538 |

|   |          |          |          |
|---|----------|----------|----------|
| H | 13.74440 | -7.81063 | 11.35926 |
| H | 15.02304 | -3.04950 | 8.55350  |
| H | 16.13380 | -3.19224 | 9.92374  |
| H | 14.43164 | -3.67006 | 10.09109 |
| H | 12.38592 | -5.98288 | 7.24173  |
| H | 13.69567 | -6.07844 | 8.41745  |
| H | 13.03411 | -7.56138 | 7.71356  |
| H | 11.37918 | -6.63142 | 13.34017 |
| H | 9.65355  | -6.90088 | 13.11390 |
| H | 10.78121 | -8.25817 | 12.98099 |
| H | 11.78399 | -1.62359 | 15.83733 |
| H | 11.78709 | 0.12046  | 15.57303 |
| H | 11.11192 | -0.54378 | 17.06652 |
| H | 13.97955 | 2.82989  | 10.13415 |
| H | 15.73915 | 2.60778  | 10.16621 |
| H | 14.83123 | 2.37089  | 8.66470  |
| H | 13.29864 | -1.71626 | 13.19152 |
| H | 13.88591 | -3.08366 | 12.24839 |
| H | 15.02694 | -2.09951 | 13.17355 |
| H | 9.12027  | -3.34806 | 16.98117 |
| H | 8.84071  | -4.13515 | 15.42013 |
| H | 10.44445 | -3.52730 | 15.82077 |
| H | 14.60404 | 1.30997  | 13.18750 |
| H | 13.32615 | 2.05930  | 12.21811 |
| H | 12.98120 | 0.59342  | 13.13519 |
| H | 5.96269  | -2.24192 | 13.73088 |
| H | 6.87705  | -3.56784 | 14.44943 |
| H | 5.94459  | -2.47551 | 15.48522 |



|   |          |          |          |
|---|----------|----------|----------|
| H | 6.98360  | 1.42898  | 13.28791 |
| H | 5.94514  | 0.00521  | 13.33140 |
| H | 6.09224  | 1.03026  | 14.76378 |
| H | 9.19875  | 2.25593  | 15.59073 |
| H | 10.61818 | 1.79751  | 14.63769 |
| H | 9.10649  | 2.19948  | 13.82383 |
| H | 10.05108 | 2.28804  | 9.09204  |
| H | 12.04996 | 2.68935  | 8.18426  |
| H | 10.23990 | 2.65428  | 6.88136  |
| H | 10.60514 | -0.56644 | 5.70102  |
| H | 11.70362 | 1.39196  | 5.61759  |
| H | 12.71613 | -0.45410 | 6.41298  |
| H | 9.83338  | -0.27979 | 12.02979 |
| H | 8.61826  | -2.16829 | 12.05401 |
| H | 10.69231 | -2.18832 | 12.85539 |
| H | 11.15403 | -3.81159 | 9.14307  |
| H | 11.35498 | -3.98778 | 11.38776 |
| H | 9.34981  | -4.12864 | 10.42023 |
| H | 10.05262 | -1.82346 | 8.07016  |
| H | 9.35594  | 0.03231  | 9.63815  |
| H | 11.41081 | 0.33940  | 10.20008 |
| H | 12.09045 | -1.52282 | 8.63815  |

**Table S10.** Atomic coordinates for the computed structures of **3** (U–Ir bridging H<sup>-</sup>) at different spin states (singlet (sing), triplet (t) and quintet (q))

**3-U-Ir brid. H-sing**

|    |          |          |          |
|----|----------|----------|----------|
| C  | 14.32570 | -1.51889 | 11.39171 |
| C  | 14.59633 | -1.46638 | 9.97872  |
| C  | 14.99485 | -0.12305 | 9.64815  |
| C  | 14.99644 | 0.64296  | 10.87054 |
| C  | 14.58862 | -0.20521 | 11.93197 |
| Ir | 12.80479 | -0.12854 | 10.36832 |
| U  | 10.37309 | -1.46559 | 10.02249 |
| Ir | 10.84588 | -4.40194 | 9.97151  |
| C  | 11.02510 | -6.36112 | 11.08149 |
| C  | 12.19650 | -6.20590 | 10.23982 |
| C  | 11.75173 | -6.15445 | 8.87892  |
| C  | 10.31538 | -6.28060 | 8.85582  |
| C  | 9.87838  | -6.41282 | 10.22695 |
| C  | 14.63460 | -2.63544 | 9.04546  |
| C  | 15.57635 | 0.32821  | 8.34554  |
| C  | 9.46119  | -6.42541 | 7.63490  |
| C  | 13.61660 | -6.29712 | 10.70441 |
| C  | 8.46791  | -6.66277 | 10.66506 |
| C  | 15.41396 | 2.07557  | 10.99207 |
| C  | 12.63454 | -6.09661 | 7.67100  |
| C  | 11.04225 | -6.57669 | 12.56290 |
| C  | 14.50556 | 0.16735  | 13.37940 |
| C  | 14.09846 | -2.75316 | 12.20715 |
| Ir | 8.48694  | -1.09047 | 7.98675  |
| C  | 6.82550  | 0.30937  | 7.23557  |
| C  | 6.68330  | 0.13336  | 8.65447  |

|    |          |          |          |
|----|----------|----------|----------|
| C  | 6.37239  | -1.25120 | 8.90752  |
| C  | 6.30310  | -1.91925 | 7.63107  |
| C  | 6.58176  | -0.97117 | 6.61051  |
| C  | 6.69010  | 1.23050  | 9.67239  |
| C  | 5.90493  | -1.82993 | 10.20504 |
| C  | 5.93788  | -3.35712 | 7.43061  |
| C  | 6.55433  | -1.22169 | 5.13445  |
| C  | 6.94113  | 1.61504  | 6.51410  |
| U  | 10.96051 | 0.15884  | 8.26443  |
| Ir | 10.52184 | 3.08604  | 8.10800  |
| C  | 9.85079  | 4.95495  | 7.01784  |
| C  | 9.21286  | 4.92380  | 8.31196  |
| C  | 10.26059 | 4.96640  | 9.30818  |
| C  | 11.52271 | 5.02065  | 8.63814  |
| C  | 11.26731 | 5.01138  | 7.20748  |
| C  | 12.86179 | 5.19226  | 9.28523  |
| C  | 7.74536  | 5.06418  | 8.57352  |
| C  | 12.30043 | 5.17980  | 6.13710  |
| C  | 10.05090 | 5.04608  | 10.78875 |
| C  | 9.14020  | 5.02571  | 5.70170  |
| Ir | 12.36399 | -0.38220 | 5.71225  |
| C  | 13.99260 | -1.41238 | 4.52852  |
| C  | 12.70314 | -1.90850 | 4.09920  |
| C  | 11.95664 | -0.81947 | 3.55034  |
| C  | 12.78232 | 0.37272  | 3.63391  |
| C  | 14.02910 | -0.00169 | 4.22928  |
| C  | 12.43768 | 1.71296  | 3.06203  |
| C  | 10.61787 | -0.90620 | 2.88566  |

|    |          |          |          |
|----|----------|----------|----------|
| C  | 12.27378 | -3.34245 | 4.12829  |
| C  | 15.21109 | 0.89886  | 4.41299  |
| C  | 15.14530 | -2.25078 | 4.98682  |
| Ir | 9.05715  | -1.13282 | 12.66515 |
| C  | 7.40605  | -0.27908 | 13.96625 |
| C  | 8.67789  | 0.28983  | 14.36292 |
| C  | 9.51752  | -0.76832 | 14.82861 |
| C  | 8.77653  | -2.01242 | 14.71985 |
| C  | 7.48058  | -1.69827 | 14.19617 |
| C  | 9.23485  | -3.34702 | 15.22060 |
| C  | 10.87250 | -0.61756 | 15.44657 |
| C  | 9.00719  | 1.75066  | 14.38142 |
| C  | 6.35382  | -2.66852 | 14.01901 |
| C  | 6.17632  | 0.49752  | 13.61084 |
| H  | 6.17422  | -2.88589 | 10.29582 |
| H  | 4.81102  | -1.75347 | 10.28926 |
| H  | 6.35880  | -1.31154 | 11.05131 |
| H  | 13.65518 | 4.74877  | 8.67863  |
| H  | 12.89265 | 4.71363  | 10.26652 |
| H  | 13.09943 | 6.25630  | 9.41940  |
| H  | 12.51377 | 6.24294  | 5.96164  |
| H  | 11.96764 | 4.74598  | 5.19134  |
| H  | 13.24006 | 4.69252  | 6.40913  |
| H  | 7.46290  | 4.62055  | 9.53151  |
| H  | 7.14736  | 4.58005  | 7.79741  |
| H  | 7.45221  | 6.12280  | 8.60176  |
| H  | 7.01236  | 0.85833  | 10.64753 |
| H  | 5.68427  | 1.66055  | 9.78021  |

|   |          |          |          |
|---|----------|----------|----------|
| H | 7.37718  | 2.02852  | 9.38070  |
| H | 10.87937 | 4.58771  | 11.33336 |
| H | 9.13544  | 4.53087  | 11.08866 |
| H | 9.96923  | 6.09236  | 11.11147 |
| H | 8.18721  | 4.49259  | 5.73160  |
| H | 9.73959  | 4.58798  | 4.90013  |
| H | 8.93051  | 6.06939  | 5.43332  |
| H | 10.05120 | 0.01945  | 3.01322  |
| H | 10.01821 | -1.71912 | 3.30155  |
| H | 10.72733 | -1.08523 | 1.80747  |
| H | 6.35553  | -3.75306 | 6.50146  |
| H | 4.84753  | -3.48058 | 7.38407  |
| H | 6.30600  | -3.97697 | 8.25210  |
| H | 7.44888  | 1.49779  | 5.55283  |
| H | 7.51799  | 2.33576  | 7.09686  |
| H | 5.94581  | 2.03871  | 6.31681  |
| H | 12.70517 | 1.76771  | 1.99797  |
| H | 12.96757 | 2.51553  | 3.58062  |
| H | 11.36748 | 1.91783  | 3.14684  |
| H | 5.56290  | -0.99741 | 4.71842  |
| H | 6.78326  | -2.26429 | 4.89872  |
| H | 7.28158  | -0.59638 | 4.61068  |
| H | 15.82875 | 0.58481  | 5.25738  |
| H | 14.90097 | 1.93054  | 4.59492  |
| H | 15.84344 | 0.89046  | 3.51563  |
| H | 14.80625 | -3.11745 | 5.55958  |
| H | 15.82842 | -1.68315 | 5.62356  |
| H | 15.72551 | -2.62472 | 4.13185  |

|   |          |          |          |
|---|----------|----------|----------|
| H | 12.60226 | -3.86261 | 3.21882  |
| H | 11.18728 | -3.43258 | 4.19484  |
| H | 12.70217 | -3.86514 | 4.98639  |
| H | 15.41098 | 1.39630  | 8.18042  |
| H | 16.66145 | 0.15097  | 8.32159  |
| H | 15.11903 | -0.20024 | 7.50719  |
| H | 8.44649  | -6.06175 | 7.81302  |
| H | 9.86661  | -5.85413 | 6.79625  |
| H | 9.38975  | -7.47643 | 7.32186  |
| H | 8.25203  | -7.73910 | 10.66856 |
| H | 8.28802  | -6.28092 | 11.67258 |
| H | 7.75166  | -6.18129 | 9.99523  |
| H | 14.29618 | -5.74608 | 10.04980 |
| H | 13.73609 | -5.89860 | 11.71492 |
| H | 13.95059 | -7.34352 | 10.72268 |
| H | 14.37323 | -2.33048 | 8.02969  |
| H | 15.64060 | -3.07867 | 9.02571  |
| H | 13.92010 | -3.40463 | 9.34864  |
| H | 12.14448 | -5.57010 | 6.84903  |
| H | 13.57296 | -5.57997 | 7.88501  |
| H | 12.87936 | -7.10928 | 7.32460  |
| H | 11.82941 | -5.98853 | 13.04145 |
| H | 10.09296 | -6.28563 | 13.01847 |
| H | 11.22026 | -7.63323 | 12.80498 |
| H | 11.49488 | -1.49547 | 15.25667 |
| H | 11.39759 | 0.25375  | 15.04909 |
| H | 10.79163 | -0.49517 | 16.53501 |
| H | 14.92854 | 2.56600  | 11.83995 |

|   |          |          |          |
|---|----------|----------|----------|
| H | 16.49937 | 2.15649  | 11.13959 |
| H | 15.15995 | 2.64151  | 10.09249 |
| H | 13.50853 | -2.53828 | 13.10247 |
| H | 13.55654 | -3.50824 | 11.63575 |
| H | 15.05552 | -3.18422 | 12.53456 |
| H | 9.03748  | -3.45449 | 16.29601 |
| H | 8.72188  | -4.16340 | 14.70644 |
| H | 10.30753 | -3.48554 | 15.06332 |
| H | 15.45151 | -0.04814 | 13.89440 |
| H | 14.29477 | 1.23226  | 13.50940 |
| H | 13.71756 | -0.39144 | 13.88974 |
| H | 5.67812  | -2.35828 | 13.21900 |
| H | 6.72134  | -3.66785 | 13.77444 |
| H | 5.76505  | -2.74361 | 14.94246 |
| H | 6.42299  | 1.42144  | 13.08143 |
| H | 5.50272  | -0.07842 | 12.97157 |
| H | 5.61501  | 0.77556  | 14.51360 |
| H | 8.67679  | 2.21194  | 15.32152 |
| H | 10.08214 | 1.91703  | 14.28300 |
| H | 8.51819  | 2.27811  | 13.55902 |
| H | 10.08275 | 2.08655  | 9.31476  |
| H | 11.87976 | 2.24393  | 7.85752  |
| H | 9.81566  | 1.99496  | 7.13856  |
| H | 11.90747 | -1.45847 | 6.85175  |
| H | 11.03334 | 0.50098  | 5.96774  |
| H | 12.99069 | 0.44667  | 6.95364  |
| H | 9.31995  | 0.01870  | 11.54405 |
| H | 8.49889  | -2.03531 | 11.44093 |

|   |          |          |          |
|---|----------|----------|----------|
| H | 10.48470 | -1.80972 | 12.32568 |
| H | 11.30034 | -3.29718 | 8.85972  |
| H | 11.40448 | -3.36708 | 11.08817 |
| H | 9.44661  | -3.62011 | 10.16060 |
| H | 11.65315 | 0.04133  | 11.47382 |
| H | 9.14884  | -2.54112 | 8.14600  |
| H | 9.52024  | -1.07572 | 6.75828  |
| H | 12.24992 | 1.31895  | 9.94222  |

**3-U-Ir brid. H-t**

|    |          |          |          |
|----|----------|----------|----------|
| C  | 11.78785 | -0.86073 | 3.06646  |
| C  | 12.25505 | 0.50965  | 2.94488  |
| C  | 13.60362 | 0.55114  | 3.43296  |
| C  | 13.97963 | -0.76989 | 3.86793  |
| C  | 12.84394 | -1.63831 | 3.63498  |
| Ir | 12.24067 | -0.05545 | 5.11109  |
| U  | 11.11928 | 0.52969  | 7.82682  |
| Ir | 12.57830 | -0.29866 | 10.13839 |
| C  | 14.70028 | -0.24606 | 9.25439  |
| C  | 14.89179 | 0.38580  | 10.54360 |
| C  | 14.56061 | -0.54446 | 11.54979 |
| C  | 14.15368 | -1.78155 | 10.91442 |
| C  | 14.29232 | -1.60852 | 9.48969  |
| C  | 15.38524 | 1.78583  | 10.74077 |
| C  | 14.63258 | -0.33120 | 13.03003 |
| C  | 13.97466 | -3.08328 | 11.63623 |
| C  | 14.27179 | -2.70450 | 8.46853  |
| C  | 15.19867 | 0.31334  | 7.95567  |
| C  | 11.51583 | 1.62861  | 2.27861  |



|    |          |          |          |
|----|----------|----------|----------|
| C  | 14.50527 | 1.74686  | 3.40939  |
| C  | 15.34937 | -1.20802 | 4.28401  |
| C  | 12.82493 | -3.11904 | 3.85736  |
| C  | 10.47861 | -1.38295 | 2.56135  |
| Ir | 10.78083 | 3.49913  | 8.06459  |
| C  | 10.17361 | 5.19773  | 9.40367  |
| C  | 11.55044 | 5.35848  | 9.05465  |
| C  | 11.63018 | 5.52141  | 7.61270  |
| C  | 10.29303 | 5.46608  | 7.09612  |
| C  | 9.38128  | 5.26121  | 8.19307  |
| C  | 12.69762 | 5.46975  | 10.01041 |
| C  | 12.86954 | 5.84918  | 6.83884  |
| C  | 9.89715  | 5.67945  | 5.66767  |
| C  | 7.88656  | 5.31352  | 8.12083  |
| C  | 9.62646  | 5.08733  | 10.79317 |
| Ir | 8.83296  | -1.14750 | 8.11308  |
| U  | 10.26349 | -1.93236 | 10.45723 |
| Ir | 9.12998  | -1.26102 | 13.15260 |
| C  | 9.56164  | -0.36517 | 15.16398 |
| C  | 9.12699  | -1.74087 | 15.33880 |
| C  | 7.78150  | -1.83572 | 14.85202 |
| C  | 7.37306  | -0.54124 | 14.36627 |
| C  | 8.48577  | 0.36299  | 14.56712 |
| C  | 9.89424  | -2.81369 | 16.04809 |
| C  | 6.91079  | -3.05248 | 14.91977 |
| C  | 5.99383  | -0.15549 | 13.93009 |
| C  | 8.46653  | 1.83416  | 14.28902 |
| C  | 10.85632 | 0.20733  | 15.65189 |

|    |          |          |          |
|----|----------|----------|----------|
| C  | 6.54646  | -1.88504 | 7.66668  |
| C  | 6.87460  | -0.95050 | 6.66329  |
| C  | 7.24145  | 0.29781  | 7.30133  |
| C  | 7.07830  | 0.12688  | 8.72378  |
| C  | 6.69821  | -1.24385 | 8.95685  |
| C  | 6.09333  | -3.29827 | 7.46705  |
| C  | 6.83841  | -1.17040 | 5.18277  |
| C  | 7.40705  | 1.60191  | 6.58021  |
| C  | 7.05155  | 1.22775  | 9.73984  |
| C  | 6.19263  | -1.81189 | 10.24926 |
| Ir | 10.56255 | -4.91900 | 10.35381 |
| C  | 11.88732 | -6.68115 | 9.88755  |
| C  | 10.69192 | -6.76314 | 9.06719  |
| C  | 9.57043  | -6.88927 | 9.94972  |
| C  | 10.04630 | -6.87391 | 11.31226 |
| C  | 11.48708 | -6.75313 | 11.25983 |
| C  | 10.66412 | -6.85178 | 7.57263  |
| C  | 8.14778  | -7.10054 | 9.53208  |
| C  | 9.22722  | -7.11991 | 12.54114 |
| C  | 12.40298 | -6.80064 | 12.44403 |
| C  | 13.29203 | -6.68029 | 9.36951  |
| H  | 6.37726  | -2.88836 | 10.31405 |
| H  | 5.10722  | -1.65827 | 10.33798 |
| H  | 6.67605  | -1.35015 | 11.11351 |
| H  | 13.62696 | 5.11180  | 9.56112  |
| H  | 12.52202 | 4.88134  | 10.91392 |
| H  | 12.85417 | 6.51409  | 10.31229 |
| H  | 13.06312 | 6.93041  | 6.84536  |

|   |          |          |          |
|---|----------|----------|----------|
| H | 12.78459 | 5.53236  | 5.79660  |
| H | 13.74610 | 5.35181  | 7.26148  |
| H | 7.42524  | 4.73435  | 8.92491  |
| H | 7.51530  | 4.91279  | 7.17417  |
| H | 7.52335  | 6.34676  | 8.20865  |
| H | 7.32952  | 0.86138  | 10.73119 |
| H | 6.04173  | 1.65856  | 9.80549  |
| H | 7.74616  | 2.02836  | 9.47427  |
| H | 10.34676 | 4.62211  | 11.46981 |
| H | 8.71550  | 4.48464  | 10.81651 |
| H | 9.38119  | 6.08079  | 11.19107 |
| H | 8.99236  | 5.12094  | 5.41677  |
| H | 10.68543 | 5.35796  | 4.98334  |
| H | 9.69904  | 6.74246  | 5.47873  |
| H | 9.68885  | -0.63298 | 2.64860  |
| H | 10.15825 | -2.26541 | 3.11972  |
| H | 10.55499 | -1.66395 | 1.50235  |
| H | 6.39034  | -3.68221 | 6.48751  |
| H | 4.99988  | -3.37611 | 7.53484  |
| H | 6.51808  | -3.96129 | 8.22575  |
| H | 7.91666  | 1.46562  | 5.62163  |
| H | 8.00026  | 2.31388  | 7.15923  |
| H | 6.42693  | 2.05506  | 6.37158  |
| H | 11.67712 | 1.61576  | 1.19212  |
| H | 11.84400 | 2.60135  | 2.65271  |
| H | 10.43985 | 1.55610  | 2.45621  |
| H | 5.90596  | -0.78495 | 4.74881  |
| H | 6.90444  | -2.23195 | 4.93000  |

|   |          |          |          |
|---|----------|----------|----------|
| H | 7.66822  | -0.66040 | 4.68632  |
| H | 15.23627 | 1.71080  | 4.22044  |
| H | 13.93983 | 2.67559  | 3.51396  |
| H | 15.05691 | 1.79262  | 2.46152  |
| H | 15.30841 | -2.05741 | 4.97069  |
| H | 15.89168 | -0.40482 | 4.78871  |
| H | 15.94615 | -1.51493 | 3.41409  |
| H | 13.19646 | -3.64810 | 2.96995  |
| H | 11.81478 | -3.47860 | 4.06604  |
| H | 13.45615 | -3.40231 | 4.70291  |
| H | 15.04848 | 1.39561  | 7.90092  |
| H | 16.27663 | 0.12480  | 7.84541  |
| H | 14.68311 | -0.12558 | 7.09825  |
| H | 9.71572  | -6.48998 | 7.16846  |
| H | 11.45900 | -6.25106 | 7.12365  |
| H | 10.79838 | -7.88908 | 7.23656  |
| H | 7.92723  | -8.17332 | 9.45816  |
| H | 7.45091  | -6.66565 | 10.25251 |
| H | 7.94566  | -6.65006 | 8.55774  |
| H | 13.34611 | -6.28713 | 12.24293 |
| H | 11.94833 | -6.32721 | 13.31753 |
| H | 12.63701 | -7.84004 | 12.70877 |
| H | 13.97069 | -2.32954 | 7.48717  |
| H | 15.27170 | -3.15194 | 8.37121  |
| H | 13.57337 | -3.49520 | 8.75162  |
| H | 13.37073 | -6.12435 | 8.43200  |
| H | 13.98540 | -6.22679 | 10.08180 |
| H | 13.63550 | -7.70555 | 9.17765  |

|   |          |          |          |
|---|----------|----------|----------|
| H | 9.65232  | -6.60850 | 13.40849 |
| H | 8.20474  | -6.75444 | 12.41640 |
| H | 9.17324  | -8.19168 | 12.77711 |
| H | 11.66528 | -0.52439 | 15.58887 |
| H | 11.15487 | 1.07866  | 15.06460 |
| H | 10.77247 | 0.52147  | 16.70104 |
| H | 15.11829 | 2.17223  | 11.72789 |
| H | 16.47875 | 1.83530  | 10.65104 |
| H | 14.96290 | 2.46418  | 9.99447  |
| H | 13.46985 | -2.94053 | 12.59632 |
| H | 13.36826 | -3.78730 | 11.06103 |
| H | 14.95006 | -3.54844 | 11.84126 |
| H | 9.73852  | -2.75588 | 17.13388 |
| H | 9.58492  | -3.80902 | 15.72014 |
| H | 10.96741 | -2.72554 | 15.86081 |
| H | 15.56982 | -0.72974 | 13.44130 |
| H | 14.58503 | 0.73005  | 13.28816 |
| H | 13.80844 | -0.83305 | 13.54394 |
| H | 6.18871  | -3.07164 | 14.10020 |
| H | 7.50191  | -3.96918 | 14.86171 |
| H | 6.34946  | -3.07141 | 15.86288 |
| H | 6.01529  | 0.67304  | 13.21750 |
| H | 5.47809  | -0.98930 | 13.44737 |
| H | 5.38262  | 0.16102  | 14.78652 |
| H | 8.05667  | 2.38337  | 15.14678 |
| H | 9.47075  | 2.21671  | 14.09334 |
| H | 7.84945  | 2.06652  | 13.41794 |
| H | 10.08797 | 2.33256  | 8.96345  |

|   |          |          |          |
|---|----------|----------|----------|
| H | 12.16581 | 2.65595  | 8.12637  |
| H | 10.44768 | 2.59804  | 6.75756  |
| H | 12.20892 | -1.03610 | 6.41177  |
| H | 10.72191 | 0.37810  | 5.48229  |
| H | 12.70062 | 1.13701  | 6.11123  |
| H | 9.17413  | -0.31754 | 11.82518 |
| H | 8.67433  | -2.48218 | 12.18794 |
| H | 10.64740 | -1.71920 | 12.80410 |
| H | 11.25003 | -3.81239 | 9.37375  |
| H | 10.90871 | -3.93770 | 11.59786 |
| H | 9.18921  | -4.06973 | 10.21266 |
| H | 11.51333 | -0.08500 | 11.32597 |
| H | 9.47591  | -2.61023 | 8.31388  |
| H | 9.92359  | -1.33677 | 6.94417  |
| H | 11.96136 | 1.17726  | 9.95584  |

**3-U-Ir brid. H-q**

|    |          |          |          |
|----|----------|----------|----------|
| C  | 7.63249  | -2.05615 | 14.83986 |
| C  | 7.38727  | -0.67759 | 14.51254 |
| C  | 8.59576  | 0.06209  | 14.82250 |
| C  | 9.56398  | -0.85547 | 15.33482 |
| C  | 8.97282  | -2.18182 | 15.34262 |
| Ir | 9.07521  | -1.44937 | 13.23003 |
| U  | 10.20375 | -1.91375 | 10.48836 |
| U  | 11.03915 | 0.54698  | 7.85013  |
| Ir | 12.23505 | -0.28261 | 5.22176  |
| C  | 13.58057 | 0.22111  | 3.50029  |
| C  | 14.02693 | -1.02267 | 4.07342  |
| C  | 12.94649 | -1.97598 | 3.92434  |

|    |          |          |          |
|----|----------|----------|----------|
| C  | 11.85423 | -1.32548 | 3.27129  |
| C  | 12.24336 | 0.04934  | 3.00830  |
| C  | 15.41276 | -1.33248 | 4.54772  |
| C  | 13.01349 | -3.42492 | 4.29569  |
| C  | 10.57967 | -1.96990 | 2.82166  |
| C  | 11.44938 | 1.04823  | 2.22436  |
| C  | 14.40872 | 1.46131  | 3.36250  |
| C  | 6.07108  | -0.08096 | 14.12102 |
| C  | 8.75243  | 1.54807  | 14.72317 |
| C  | 10.91298 | -0.50365 | 15.88088 |
| C  | 9.59172  | -3.41552 | 15.92338 |
| C  | 6.62691  | -3.16307 | 14.75976 |
| Ir | 12.43184 | -0.17778 | 10.24752 |
| C  | 14.39989 | -0.21733 | 11.68531 |
| C  | 14.11693 | -1.49709 | 11.06709 |
| C  | 14.26708 | -1.34031 | 9.64331  |
| C  | 14.56199 | 0.04879  | 9.38772  |
| C  | 14.66911 | 0.71912  | 10.66636 |
| C  | 14.03236 | -2.79929 | 11.80446 |
| C  | 14.35004 | -2.45657 | 8.64792  |
| C  | 15.03745 | 0.63033  | 8.09031  |
| C  | 15.02713 | 2.16211  | 10.84256 |
| C  | 14.42751 | 0.02830  | 13.16209 |
| Ir | 10.69021 | -4.85318 | 10.15660 |
| C  | 9.73591  | -6.87632 | 10.10690 |
| C  | 10.75767 | -6.88261 | 11.11070 |
| C  | 12.02838 | -6.64167 | 10.45198 |
| C  | 11.76802 | -6.48793 | 9.05012  |

|    |          |          |          |
|----|----------|----------|----------|
| C  | 10.35026 | -6.62634 | 8.82206  |
| C  | 10.57629 | -7.21680 | 12.55897 |
| C  | 13.37205 | -6.71052 | 11.10859 |
| C  | 12.79955 | -6.32195 | 7.97758  |
| C  | 9.66880  | -6.66950 | 7.48962  |
| C  | 8.28616  | -7.17745 | 10.33210 |
| Ir | 8.68805  | -1.02459 | 8.21494  |
| C  | 6.68981  | -0.73399 | 6.85063  |
| C  | 7.13763  | 0.49682  | 7.47045  |
| C  | 7.02619  | 0.33275  | 8.89910  |
| C  | 6.58349  | -1.01595 | 9.14982  |
| C  | 6.35319  | -1.65005 | 7.86857  |
| C  | 7.32112  | 1.79145  | 6.73800  |
| C  | 7.11088  | 1.42823  | 9.91719  |
| C  | 6.08752  | -1.54906 | 10.45994 |
| C  | 5.81990  | -3.03735 | 7.68336  |
| C  | 6.58118  | -0.95525 | 5.37371  |
| Ir | 10.82504 | 3.54725  | 7.89995  |
| C  | 11.95986 | 5.46995  | 7.75004  |
| C  | 10.95015 | 5.45875  | 6.73538  |
| C  | 9.65725  | 5.40579  | 7.39330  |
| C  | 9.89239  | 5.38012  | 8.80778  |
| C  | 11.31401 | 5.41543  | 9.04396  |
| C  | 11.16726 | 5.61582  | 5.26213  |
| C  | 8.33093  | 5.53085  | 6.71050  |
| C  | 8.84087  | 5.41162  | 9.87370  |
| C  | 11.98403 | 5.55132  | 10.37610 |
| C  | 13.43243 | 5.61975  | 7.52152  |



|   |          |          |          |
|---|----------|----------|----------|
| H | 6.17466  | -2.63818 | 10.51009 |
| H | 5.02532  | -1.29809 | 10.59612 |
| H | 6.64939  | -1.14375 | 11.30411 |
| H | 12.99756 | 5.14407  | 10.35474 |
| H | 11.43597 | 5.01461  | 11.15453 |
| H | 12.05436 | 6.60493  | 10.68020 |
| H | 13.71501 | 6.68050  | 7.51807  |
| H | 13.73475 | 5.18821  | 6.56460  |
| H | 14.00954 | 5.12446  | 8.30590  |
| H | 7.52341  | 5.12595  | 7.32484  |
| H | 8.31932  | 4.99541  | 5.75775  |
| H | 8.09456  | 6.58356  | 6.50462  |
| H | 7.43664  | 1.04594  | 10.88786 |
| H | 6.12836  | 1.90431  | 10.04962 |
| H | 7.82191  | 2.19736  | 9.60811  |
| H | 9.16129  | 4.86568  | 10.76408 |
| H | 7.90543  | 4.96529  | 9.52855  |
| H | 8.62825  | 6.44644  | 10.17159 |
| H | 10.41023 | 5.07405  | 4.68967  |
| H | 12.14492 | 5.23343  | 4.95958  |
| H | 11.11525 | 6.67322  | 4.96979  |
| H | 9.75349  | -1.25506 | 2.81481  |
| H | 10.29427 | -2.79442 | 3.47907  |
| H | 10.68326 | -2.36989 | 1.80410  |
| H | 6.09069  | -3.44494 | 6.70576  |
| H | 4.72407  | -3.05215 | 7.75570  |
| H | 6.20822  | -3.71876 | 8.44520  |
| H | 7.80728  | 1.63817  | 5.76996  |

|   |          |          |          |
|---|----------|----------|----------|
| H | 7.94499  | 2.49110  | 7.29795  |
| H | 6.34791  | 2.26671  | 6.54739  |
| H | 11.62996 | 0.93701  | 1.14660  |
| H | 11.71063 | 2.07204  | 2.50282  |
| H | 10.37688 | 0.92689  | 2.39625  |
| H | 5.63074  | -0.56515 | 4.98520  |
| H | 6.62937  | -2.01755 | 5.11986  |
| H | 7.38757  | -0.45021 | 4.83540  |
| H | 15.11540 | 1.56218  | 4.18954  |
| H | 13.78333 | 2.35684  | 3.34960  |
| H | 14.98453 | 1.43783  | 2.42830  |
| H | 15.40817 | -2.09342 | 5.33241  |
| H | 15.90484 | -0.44550 | 4.95460  |
| H | 16.03664 | -1.70895 | 3.72538  |
| H | 13.47101 | -4.00991 | 3.48698  |
| H | 12.01797 | -3.83342 | 4.48361  |
| H | 13.61107 | -3.57799 | 5.19745  |
| H | 14.75817 | 1.68411  | 7.99547  |
| H | 16.13365 | 0.57251  | 8.02369  |
| H | 14.61287 | 0.10723  | 7.23063  |
| H | 8.63147  | -6.33425 | 7.56311  |
| H | 10.16759 | -6.01797 | 6.76787  |
| H | 9.66364  | -7.68769 | 7.07632  |
| H | 8.09941  | -8.25517 | 10.23903 |
| H | 7.96323  | -6.86547 | 11.32802 |
| H | 7.65459  | -6.66531 | 9.60259  |
| H | 14.12041 | -6.13720 | 10.55631 |
| H | 13.33800 | -6.31193 | 12.12563 |

|   |          |          |          |
|---|----------|----------|----------|
| H | 13.72638 | -7.74844 | 11.16883 |
| H | 14.07314 | -2.11450 | 7.64790  |
| H | 15.37515 | -2.85278 | 8.60463  |
| H | 13.67651 | -3.27521 | 8.91453  |
| H | 12.42043 | -5.71580 | 7.15177  |
| H | 13.70253 | -5.83896 | 8.35759  |
| H | 13.08913 | -7.30004 | 7.57196  |
| H | 11.30104 | -6.68847 | 13.18334 |
| H | 9.57892  | -6.94066 | 12.90918 |
| H | 10.70695 | -8.29347 | 12.73224 |
| H | 11.62216 | -1.32406 | 15.74695 |
| H | 11.32754 | 0.37705  | 15.38523 |
| H | 10.85219 | -0.28821 | 16.95592 |
| H | 14.69190 | 2.54524  | 11.80997 |
| H | 16.11388 | 2.31113  | 10.78594 |
| H | 14.56857 | 2.77907  | 10.06480 |
| H | 13.49545 | -2.69251 | 12.75165 |
| H | 13.50620 | -3.55724 | 11.22033 |
| H | 15.03831 | -3.17843 | 12.03609 |
| H | 9.39612  | -3.48726 | 17.00202 |
| H | 9.19653  | -4.31836 | 15.45150 |
| H | 10.67534 | -3.42201 | 15.78056 |
| H | 15.39228 | -0.27123 | 13.59330 |
| H | 14.27581 | 1.08477  | 13.39928 |
| H | 13.64767 | -0.54176 | 13.67368 |
| H | 5.91158  | -2.99631 | 13.95118 |
| H | 7.11015  | -4.12646 | 14.58207 |
| H | 6.06240  | -3.23733 | 15.69818 |

|   |          |          |          |
|---|----------|----------|----------|
| H | 6.20001  | 0.80514  | 13.49405 |
| H | 5.45839  | -0.79202 | 13.56179 |
| H | 5.49886  | 0.22284  | 15.00828 |
| H | 8.38394  | 2.03961  | 15.63328 |
| H | 9.79927  | 1.82993  | 14.58918 |
| H | 8.19229  | 1.95088  | 13.87579 |
| H | 10.09909 | 2.49052  | 8.89988  |
| H | 12.15854 | 2.63100  | 8.03085  |
| H | 10.38484 | 2.55552  | 6.68958  |
| H | 12.24507 | -1.10961 | 6.62620  |
| H | 10.68942 | 0.09364  | 5.53899  |
| H | 12.60779 | 1.04199  | 6.07751  |
| H | 9.12029  | -0.40708 | 11.97769 |
| H | 8.59634  | -2.57951 | 12.16713 |
| H | 10.58628 | -1.88984 | 12.84064 |
| H | 11.27658 | -3.63942 | 9.24384  |
| H | 11.07508 | -3.95782 | 11.45652 |
| H | 9.26855  | -4.07529 | 10.19803 |
| H | 11.36207 | -0.09216 | 11.44580 |
| H | 9.26474  | -2.51868 | 8.39353  |
| H | 9.71974  | -1.27731 | 7.00758  |
| H | 11.65767 | 1.22394  | 10.06113 |

## References

- 1 P. J. Bailey, R. A. Coxall, C. M. Dick, S. Fabre, L. C. Henderson, C. Herber, S. T. Liddle, D. Loroño-González, A. Parkin and S. Parsons, *Chem. – Eur. J.*, 2003, **9**, 4820–4828.
- 2 T. M. Gilbert, F. J. Hollander and R. G. Bergman, *J. Am. Chem. Soc.*, 1985, **107**, 3508–3516.
- 3 M. J. Monreal, R. K. Thomson, T. Cantat, N. E. Travia, B. L. Scott and J. L. Kiplinger, *Organometallics*, 2011, **30**, 2031–2038.
- 4 J. L. Kiplinger, D. E. Morris, B. L. Scott and C. J. Burns, *Organometallics*, 2002, **21**, 5978–5982.
- 5 T. Cantat, B. L. Scott and J. L. Kiplinger, *Chem. Commun.*, 2010, **46**, 919–921.
- 6 M. D. Walter, C. H. Booth, W. W. Lukens and R. A. Andersen, *Organometallics*, 2009, **28**, 698–707.
- 7 C. H. Booth, M. D. Walter, D. Kazhdan, Y.-J. Hu, W. W. Lukens, E. D. Bauer, L. Maron, O. Eisenstein and R. A. Andersen, *J. Am. Chem. Soc.*, 2009, **131**, 6480–6491.
- 8 C. H. Booth, D. Kazhdan, E. L. Werkema, M. D. Walter, W. W. Lukens, E. D. Bauer, Y.-J. Hu, L. Maron, O. Eisenstein, M. Head-Gordon and R. A. Andersen, *J. Am. Chem. Soc.*, 2010, **132**, 17537–17549.
- 9 G. A. Bain and J. F. Berry, *J. Chem. Educ.*, 2008, **85**, 532.
- 10 M. J. Frisch, G. W. Trucks, H. B. Schlegel, G. E. Scuseria, M. A. Robb, J. R. Cheeseman, G. Scalmani, V. Barone, G. A. Petersson, H. Nakatsuji, X. Li, M. Caricato, A. Marenich, J. Bloino, B. G. Janesko, R. Gomperts, B. Mennucci, H. P. Hratchian, J. V. Ortiz, A. F. Izmaylov, J. L. Sonnenberg, D. Williams-Young, F. Ding, F. Lipparini, F. Egidi, J. Goings, B. Peng, A. Petrone, T. Henderson, D. Ranasinghe, V. G. Zakrzewski, J. Gao, N. Rega, G. Zheng, W. Liang, M. Hada, M. Ehara, K. Toyota, R. Fukuda, J. Hasegawa, M. Ishida, T. Nakajima, Y. Honda, O. Kitao, H. Nakai, T. Vreven, K. Throssell, J. A. Montgomery, Jr., J. E. Peralta, F. Ogliaro, M. Bearpark, J. J. Heyd, E. Brothers, K. N. Kudin, V. N. Staroverov, T. Keith, R. Kobayashi, J. Normand, K. Raghavachari, A. Rendell, J. C. Burant, S. S. Iyengar, J. Tomasi, M. Cossi, J. M. Millam, M. Klene, C. Adamo, R. Cammi, J. W. Ochterski, R. L. Martin, K. Morokuma, O. Farkas, J. B. Foresman and D. J. Fox, .
- 11 J. P. Perdew, J. A. Chevary, S. H. Vosko, K. A. Jackson, M. R. Pederson, D. J. Singh and C. Fiolhais, *Phys. Rev. B*, 1992, **46**, 6671–6687.
- 12 A. D. Becke, *J. Chem. Phys.*, 1993, **98**, 5648–5652.
- 13 X. Cao and M. Dolg, *J. Mol. Struct. THEOCHEM*, 2004, **673**, 203–209.
- 14 X. Cao, M. Dolg and H. Stoll, *J. Chem. Phys.*, 2003, **118**, 487–496.
- 15 D. Andrae, U. Häußermann, M. Dolg, H. Stoll and H. Preuß, *Theor. Chim. Acta*, 1990, **77**, 123–141.
- 16 A. W. Ehlers, M. Böhme, S. Dapprich, A. Gobbi, A. Höllwarth, V. Jonas, K. F. Köhler, R. Stegmann, A. Veldkamp and G. Frenking, *Chem. Phys. Lett.*, 1993, **208**, 111–114.
- 17 P. C. Hariharan and J. A. Pople, *Theor. Chim. Acta*, 1973, **28**, 213–222.
- 18 R. Ditchfield, W. J. Hehre and J. A. Pople, *J. Chem. Phys.*, 1971, **54**, 724–728.
- 19 W. J. Hehre, R. Ditchfield and J. A. Pople, *J. Chem. Phys.*, 1972, **56**, 2257–2261.
- 20 S. Grimme, S. Ehrlich and L. Goerigk, *J. Comput. Chem.*, 2011, **32**, 1456–1465.
- 21 A. E. Reed, L. A. Curtiss and F. Weinhold, *Chem. Rev.*, 1988, **88**, 899–926.
